# Supplementary material for: DeepPoseKit, a software toolkit for fast and robust animal pose estimation using deep learning
Source: eLife. 2019 Oct 1;8:e47994. doi: 10.7554/eLife.47994 (PMC6897514; doi:10.7554/eLife.47994)
Supplement: Appendix 1—figure 1—source data 1. — See 'Materials and methods’ for details. [file elife-47994-app1-fig1-data1.csv]

	downsample	maxima	treatment	error
0	0	integer	0 False	2.23606797749979
1	0	integer	0 False	2.0
2	0	integer	0 False	1.0
3	0	integer	0 False	1.4142135623730951
4	0	integer	0 False	2.23606797749979
5	0	integer	0 False	1.4142135623730951
6	0	integer	0 False	2.23606797749979
7	0	integer	0 False	1.4142135623730951
8	0	integer	0 False	1.0
9	0	integer	0 False	0.0
10	0	integer	0 False	1.0
11	0	integer	0 False	3.605551275463989
12	0	integer	0 False	3.1622776601683795
13	0	integer	0 False	2.23606797749979
14	0	integer	0 False	1.0
15	0	integer	0 False	1.4142135623730951
16	0	integer	0 False	1.0
17	0	integer	0 False	1.0
18	0	integer	0 False	1.4142135623730951
19	0	integer	0 False	1.0
20	0	integer	0 False	2.23606797749979
21	0	integer	0 False	1.0
22	0	integer	0 False	1.0
23	0	integer	0 False	1.0
24	0	integer	0 False	2.0
25	0	integer	0 False	1.144430553185826
26	0	integer	0 False	2.0
27	0	integer	0 False	1.4142135623730951
28	0	integer	0 False	1.0
29	0	integer	0 False	0.0
30	0	integer	0 False	1.0
31	0	integer	0 False	3.0
32	0	integer	0 False	1.4142135623730951
33	0	integer	0 False	2.0
34	0	integer	0 False	2.23606797749979
35	0	integer	0 False	0.0
36	0	integer	0 False	1.0
37	0	integer	0 False	1.4142135623730951
38	0	integer	0 False	1.4142135623730951
39	0	integer	0 False	1.0
40	0	integer	0 False	2.0
41	0	integer	0 False	2.8284271247461903
42	0	integer	0 False	2.23606797749979
43	0	integer	0 False	1.0
44	0	integer	0 False	2.0
45	0	integer	0 False	1.0
46	0	integer	0 False	1.4142135623730951
47	0	integer	0 False	2.23606797749979
48	0	integer	0 False	2.23606797749979
49	0	integer	0 False	1.4142135623730951
50	0	integer	0 False	1.4142135623730951
51	0	integer	0 False	1.0
52	0	integer	0 False	1.4142135623730951
53	0	integer	0 False	1.0
54	0	integer	0 False	1.4142135623730951
55	0	integer	0 False	2.23606797749979
56	0	integer	0 False	1.0
57	0	integer	0 False	1.4142135623730951
58	0	integer	0 False	2.23606797749979
59	0	integer	0 False	1.0
60	0	integer	0 False	1.4142135623730951
61	0	integer	0 False	1.0
62	0	integer	0 False	0.0
63	0	integer	0 False	1.0
64	0	integer	0 False	1.0
65	0	integer	0 False	2.8284271247461903
66	0	integer	0 False	1.0
67	0	integer	0 False	1.0
68	0	integer	0 False	1.0
69	0	integer	0 False	2.23606797749979
70	0	integer	0 False	2.23606797749979
71	0	integer	0 False	2.23606797749979
72	0	integer	0 False	2.0
73	0	integer	0 False	2.23606797749979
74	0	integer	0 False	2.23606797749979
75	0	integer	0 False	4.242640687119285
76	0	integer	0 False	2.0
77	0	integer	0 False	1.0
78	0	integer	0 False	1.4142135623730951
79	0	integer	0 False	1.4142135623730951
80	0	integer	0 False	1.0
81	0	integer	0 False	5.619383323739851
82	0	integer	0 False	1.0
83	0	integer	0 False	1.4142135623730951
84	0	integer	0 False	2.23606797749979
85	0	integer	0 False	1.4142135623730951
86	0	integer	0 False	1.0
87	0	integer	0 False	2.7765475574141236
88	0	integer	0 False	4.969896519480162
89	0	integer	0 False	1.0
90	0	integer	0 False	2.23606797749979
91	0	integer	0 False	6.406886648462284
92	0	integer	0 False	13.847883867324065
93	0	integer	0 False	16.52179092810334
94	0	integer	0 False	1.4142135623730951
95	0	integer	0 False	0.0
96	0	integer	0 False	1.0
97	0	integer	0 False	0.0
98	0	integer	0 False	1.0
99	0	integer	0 False	2.23606797749979
100	0	integer	0 False	2.0
101	0	integer	0 False	1.4142135623730951
102	0	integer	0 False	1.4142135623730951
103	0	integer	0 False	2.23606797749979
104	0	integer	0 False	0.0
105	0	integer	0 False	2.0
106	0	integer	0 False	0.0
107	0	integer	0 False	2.23606797749979
108	0	integer	0 False	2.0
109	0	integer	0 False	0.0
110	0	integer	0 False	1.0
111	0	integer	0 False	1.0
112	0	integer	0 False	2.8284271247461903
113	0	integer	0 False	1.0
114	0	integer	0 False	1.0
115	0	integer	0 False	1.0
116	0	integer	0 False	3.1622776601683795
117	0	integer	0 False	1.0
118	0	integer	0 False	1.0
119	0	integer	0 False	1.0
120	0	integer	0 False	2.0
121	0	integer	0 False	1.0
122	0	integer	0 False	2.0
123	0	integer	0 False	2.0
124	0	integer	0 False	1.0
125	0	integer	0 False	3.605551275463989
126	0	integer	0 False	1.0
127	0	integer	0 False	1.0
128	0	integer	0 False	2.23606797749979
129	0	integer	0 False	2.23606797749979
130	0	integer	0 False	2.23606797749979
131	0	integer	0 False	2.8284271247461903
132	0	integer	0 False	2.23606797749979
133	0	integer	0 False	0.0
134	0	integer	0 False	1.4142135623730951
135	0	integer	0 False	7.211102550927978
136	0	integer	0 False	4.009632355741751
137	0	integer	0 False	1.664643720148289
138	0	integer	0 False	3.0
139	0	integer	0 False	1.0
140	0	integer	0 False	1.4142135623730951
141	0	integer	0 False	0.0
142	0	integer	0 False	2.23606797749979
143	0	integer	0 False	1.0
144	0	integer	0 False	2.23606797749979
145	0	integer	0 False	11.40175425099138
146	0	integer	0 False	5.830951894845301
147	0	integer	0 False	1.8730462569513187
148	0	integer	0 False	5.081764442366722
149	0	integer	0 False	1.0
150	0	integer	0 False	0.94799798793041
151	0	integer	0 False	1.4142135623730951
152	0	integer	0 False	13.943766583611987
153	0	integer	0 False	3.2168288523168
154	0	integer	0 False	2.0
155	0	integer	0 False	0.7707144970110456
156	0	integer	0 False	3.792078382419682
157	0	integer	0 False	0.7830226534490571
158	0	integer	0 False	1.4142135623730951
159	0	integer	0 False	0.0
160	0	integer	0 False	1.4142135623730951
161	0	integer	0 False	2.23606797749979
162	0	integer	0 False	0.0
163	0	integer	0 False	1.0
164	0	integer	0 False	2.23606797749979
165	0	integer	0 False	1.0
166	0	integer	0 False	0.0
167	0	integer	0 False	1.0
168	0	integer	0 False	1.4142135623730951
169	0	integer	0 False	1.0
170	0	integer	0 False	3.1622776601683795
171	0	integer	0 False	2.23606797749979
172	0	integer	0 False	1.0
173	0	integer	0 False	2.0
174	0	integer	0 False	0.0
175	0	integer	0 False	3.1622776601683795
176	0	integer	0 False	1.4142135623730951
177	0	integer	0 False	3.277494698234962
178	0	integer	0 False	1.4142135623730951
179	0	integer	0 False	1.4142135623730951
180	0	integer	0 False	1.0
181	0	integer	0 False	1.0
182	0	integer	0 False	2.0
183	0	integer	0 False	3.1622776601683795
184	0	integer	0 False	1.0
185	0	integer	0 False	1.4142135623730951
186	0	integer	0 False	3.605551275463989
187	0	integer	0 False	1.4142135623730951
188	0	integer	0 False	0.0
189	0	integer	0 False	2.23606797749979
190	0	integer	0 False	2.23606797749979
191	0	integer	0 False	2.0
192	0	integer	0 False	1.0
193	0	integer	0 False	2.0
194	0	integer	0 False	2.23606797749979
195	0	integer	0 False	1.0
196	0	integer	0 False	2.23606797749979
197	0	integer	0 False	1.4142135623730951
198	0	integer	0 False	2.23606797749979
199	0	integer	0 False	2.23606797749979
200	0	integer	0 False	2.8284271247461903
201	0	integer	0 False	1.0
202	0	integer	0 False	4.123105625617661
203	0	integer	0 False	1.0
204	0	integer	0 False	1.4142135623730951
205	0	integer	0 False	3.1622776601683795
206	0	integer	0 False	1.0
207	0	integer	0 False	4.21891956076898
208	0	integer	0 False	2.8284271247461903
209	0	integer	0 False	2.8284271247461903
210	0	integer	0 False	2.23606797749979
211	0	integer	0 False	1.4142135623730951
212	0	integer	0 False	1.0
213	0	integer	0 False	1.4142135623730951
214	0	integer	0 False	3.0
215	0	integer	0 False	23.345235059857504
216	0	integer	0 False	20.50951608913897
217	0	integer	0 False	0.4742769138497767
218	0	integer	0 False	1.0
219	0	integer	0 False	1.0
220	0	integer	0 False	1.4142135623730951
221	0	integer	0 False	3.1622776601683795
222	0	integer	0 False	2.0
223	0	integer	0 False	1.0
224	0	integer	0 False	2.23606797749979
225	0	integer	0 False	1.4142135623730951
226	0	integer	0 False	0.0
227	0	integer	0 False	2.0
228	0	integer	0 False	1.0
229	0	integer	0 False	1.0
230	0	integer	0 False	1.0
231	0	integer	0 False	1.0
232	0	integer	0 False	1.0
233	0	integer	0 False	2.23606797749979
234	0	integer	0 False	1.0
235	0	integer	0 False	3.0
236	0	integer	0 False	2.23606797749979
237	0	integer	0 False	0.0
238	0	integer	0 False	1.0
239	0	integer	0 False	1.4142135623730951
240	0	integer	0 False	1.4142135623730951
241	0	integer	0 False	0.0
242	0	integer	0 False	2.23606797749979
243	0	integer	0 False	2.23606797749979
244	0	integer	0 False	1.4142135623730951
245	0	integer	0 False	1.0
246	0	integer	0 False	1.0
247	0	integer	0 False	1.4142135623730951
248	0	integer	0 False	1.0
249	0	integer	0 False	1.0
250	0	integer	0 False	1.0
251	0	integer	0 False	1.4142135623730951
252	0	integer	0 False	0.0
253	0	integer	0 False	5.0990195135927845
254	0	integer	0 False	0.0
255	0	integer	0 False	1.0
256	0	integer	0 False	1.0
257	0	integer	0 False	1.4142135623730951
258	0	integer	0 False	2.0
259	0	integer	0 False	1.0
260	0	integer	0 False	2.0
261	0	integer	0 False	1.0
262	0	integer	0 False	2.23606797749979
263	0	integer	0 False	3.0
264	0	integer	0 False	1.4142135623730951
265	0	integer	0 False	2.0
266	0	integer	0 False	1.0
267	0	integer	0 False	2.8284271247461903
268	0	integer	0 False	1.0
269	0	integer	0 False	2.23606797749979
270	0	integer	0 False	0.0
271	0	integer	0 False	1.4142135623730951
272	0	integer	0 False	1.0
273	0	integer	0 False	3.0
274	0	integer	0 False	1.4142135623730951
275	0	integer	0 False	3.1622776601683795
276	0	integer	0 False	0.0
277	0	integer	0 False	1.0
278	0	integer	0 False	2.23606797749979
279	0	integer	0 False	3.605551275463989
280	0	integer	0 False	1.4142135623730951
281	0	integer	0 False	2.0
282	0	integer	0 False	2.23606797749979
283	0	integer	0 False	1.0
284	0	integer	0 False	2.8284271247461903
285	0	integer	0 False	2.23606797749979
286	0	integer	0 False	0.0
287	0	integer	0 False	1.0
288	0	integer	0 False	1.0
289	0	integer	0 False	0.0
290	0	integer	0 False	1.4142135623730951
291	0	integer	0 False	0.0
292	0	integer	0 False	2.0
293	0	integer	0 False	1.0
294	0	integer	0 False	2.23606797749979
295	0	integer	0 False	1.0
296	0	integer	0 False	0.0
297	0	integer	0 False	2.0
298	0	integer	0 False	1.0
299	0	integer	0 False	1.0
300	0	integer	0 False	2.23606797749979
301	0	integer	0 False	1.4142135623730951
302	0	integer	0 False	1.0
303	0	integer	0 False	2.0
304	0	integer	0 False	1.4142135623730951
305	0	integer	0 False	1.4142135623730951
306	0	integer	0 False	2.23606797749979
307	0	integer	0 False	1.0
308	0	integer	0 False	1.4142135623730951
309	0	integer	0 False	1.0
310	0	integer	0 False	1.0
311	0	integer	0 False	2.23606797749979
312	0	integer	0 False	3.0
313	0	integer	0 False	1.0
314	0	integer	0 False	0.0
315	0	integer	0 False	1.134140497804658
316	0	integer	0 False	1.0
317	0	integer	0 False	3.597854235263771
318	0	integer	0 False	1.0
319	0	integer	0 False	0.0
320	0	integer	0 False	1.4142135623730951
321	0	integer	0 False	1.4142135623730951
322	0	integer	0 False	1.4142135623730951
323	0	integer	0 False	1.0
324	0	integer	0 False	1.0
325	0	integer	0 False	0.0
326	0	integer	0 False	2.0
327	0	integer	0 False	5.7927984848807
328	0	integer	0 False	9.691403007399272
329	0	integer	0 False	1.0
330	0	integer	0 False	1.4142135623730951
331	0	integer	0 False	1.4142135623730951
332	0	integer	0 False	0.0
333	0	integer	0 False	1.0
334	0	integer	0 False	1.4142135623730951
335	0	integer	0 False	1.0
336	0	integer	0 False	2.0
337	0	integer	0 False	2.8284271247461903
338	0	integer	0 False	3.1622776601683795
339	0	integer	0 False	2.361633313400619
340	0	integer	0 False	0.0
341	0	integer	0 False	2.0
342	0	integer	0 False	1.4142135623730951
343	0	integer	0 False	1.0
344	0	integer	0 False	1.4142135623730951
345	0	integer	0 False	0.0
346	0	integer	0 False	1.0
347	0	integer	0 False	1.0
348	0	integer	0 False	1.0
349	0	integer	0 False	1.0
350	0	integer	0 False	1.0
351	0	integer	0 False	2.0
352	0	integer	0 False	0.2455931085923286
353	0	integer	0 False	1.4142135623730951
354	0	integer	0 False	1.0
355	0	integer	0 False	1.0
356	0	integer	0 False	2.23606797749979
357	0	integer	0 False	2.4686212636256557
358	0	integer	0 False	0.0
359	0	integer	0 False	3.049728978011594
360	0	integer	0 False	3.317933971098351
361	0	integer	0 False	1.4142135623730951
362	0	integer	0 False	1.4142135623730951
363	0	integer	0 False	1.6878038009832739
364	0	integer	0 False	1.4142135623730951
365	0	integer	0 False	1.0
366	0	integer	0 False	2.0
367	0	integer	0 False	1.1645395930170634
368	0	integer	0 False	1.4142135623730951
369	0	integer	0 False	1.664671236952007
370	0	integer	0 False	3.1622776601683795
371	0	integer	0 False	5.0990195135927845
372	0	integer	0 False	1.4142135623730951
373	0	integer	0 False	2.23606797749979
374	0	integer	0 False	4.123105625617661
375	0	integer	0 False	1.342872772010463
376	0	integer	0 False	1.698614626950829
377	0	integer	0 False	1.0
378	0	integer	0 False	2.23606797749979
379	0	integer	0 False	2.3364366858226897
380	0	integer	0 False	0.5217315939712927
381	0	integer	0 False	3.192992662523909
382	0	integer	0 False	0.0
383	0	integer	0 False	3.1622776601683795
384	0	integer	0 False	1.4142135623730951
385	0	integer	0 False	2.0
386	0	integer	0 False	0.0
387	0	integer	0 False	1.0
388	0	integer	0 False	1.0
389	0	integer	0 False	1.0
390	0	integer	0 False	1.0
391	0	integer	0 False	1.0
392	0	integer	0 False	1.0
393	0	integer	0 False	1.0
394	0	integer	0 False	2.23606797749979
395	0	integer	0 False	1.4142135623730951
396	0	integer	0 False	1.0
397	0	integer	0 False	1.0
398	0	integer	0 False	1.0
399	0	integer	0 False	2.0
400	0	integer	0 False	1.4142135623730951
401	0	integer	0 False	3.0
402	0	integer	0 False	1.0
403	0	integer	0 False	2.0
404	0	integer	0 False	1.0
405	0	integer	0 False	1.0
406	0	integer	0 False	1.0
407	0	integer	0 False	2.23606797749979
408	0	integer	0 False	2.23606797749979
409	0	integer	0 False	1.0
410	0	integer	0 False	2.23606797749979
411	0	integer	0 False	3.1622776601683795
412	0	integer	0 False	0.0
413	0	integer	0 False	1.0
414	0	integer	0 False	3.1622776601683795
415	0	integer	0 False	1.0
416	0	integer	0 False	2.23606797749979
417	0	integer	0 False	1.4142135623730951
418	0	integer	0 False	1.0
419	0	integer	0 False	1.0
420	0	integer	0 False	2.0
421	0	integer	0 False	0.0
422	0	integer	0 False	2.23606797749979
423	0	integer	0 False	1.0
424	0	integer	0 False	1.4142135623730951
425	0	integer	0 False	2.0
426	0	integer	0 False	2.23606797749979
427	0	integer	0 False	1.0
428	0	integer	0 False	0.0
429	0	integer	0 False	0.0
430	0	integer	0 False	1.4142135623730951
431	0	integer	0 False	1.4142135623730951
432	0	integer	0 False	1.0
433	0	integer	0 False	1.0
434	0	integer	0 False	0.0
435	0	integer	0 False	4.47213595499958
436	0	integer	0 False	0.0
437	0	integer	0 False	1.0
438	0	integer	0 False	1.0
439	0	integer	0 False	1.4142135623730951
440	0	integer	0 False	0.0
441	0	integer	0 False	1.0
442	0	integer	0 False	1.4142135623730951
443	0	integer	0 False	3.1622776601683795
444	0	integer	0 False	1.0
445	0	integer	0 False	2.0
446	0	integer	0 False	1.0
447	0	integer	0 False	2.0
448	0	integer	0 False	1.4142135623730951
449	0	integer	0 False	2.23606797749979
450	0	integer	0 False	2.0
451	0	integer	0 False	1.0
452	0	integer	0 False	1.0
453	0	integer	0 False	2.23606797749979
454	0	integer	0 False	0.0
455	0	integer	0 False	1.4142135623730951
456	0	integer	0 False	4.0
457	0	integer	0 False	2.0
458	0	integer	0 False	1.0
459	0	integer	0 False	3.1622776601683795
460	0	integer	0 False	2.23606797749979
461	0	integer	0 False	1.0
462	0	integer	0 False	1.4142135623730951
463	0	integer	0 False	1.4142135623730951
464	0	integer	0 False	1.4142135623730951
465	0	integer	0 False	2.23606797749979
466	0	integer	0 False	5.0
467	0	integer	0 False	4.666295505004458
468	0	integer	0 False	4.269749102152188
469	0	integer	0 False	1.5286514471937704
470	0	integer	0 False	2.23606797749979
471	0	integer	0 False	0.0
472	0	integer	0 False	1.0
473	0	integer	0 False	0.0
474	0	integer	0 False	3.1622776601683795
475	0	integer	0 False	1.0
476	0	integer	0 False	1.4142135623730951
477	0	integer	0 False	2.23606797749979
478	0	integer	0 False	0.0
479	0	integer	0 False	1.4142135623730951
480	0	integer	0 False	2.0
481	0	integer	0 False	1.4142135623730951
482	0	integer	0 False	1.4142135623730951
483	0	integer	0 False	1.0
484	0	integer	0 False	1.4142135623730951
485	0	integer	0 False	1.0
486	0	integer	0 False	1.4142135623730951
487	0	integer	0 False	16.95363711696606
488	0	integer	0 False	12.31599413375791
489	0	integer	0 False	34.60876120637658
490	0	integer	0 False	2.8284271247461903
491	0	integer	0 False	0.43321441905689634
492	0	integer	0 False	0.586554251168516
493	0	integer	0 False	3.1622776601683795
494	0	integer	0 False	1.0
495	0	integer	0 False	4.123105625617661
496	0	integer	0 False	2.23606797749979
497	0	integer	0 False	2.23606797749979
498	0	integer	0 False	2.23606797749979
499	0	integer	0 False	2.23606797749979
500	0	integer	0 False	1.4142135623730951
501	0	integer	0 False	1.4142135623730951
502	0	integer	0 False	0.0
503	0	integer	0 False	5.385164807134504
504	0	integer	0 False	0.0
505	0	integer	0 False	1.0
506	0	integer	0 False	3.605551275463989
507	0	integer	0 False	5.317218752064924
508	0	integer	0 False	2.23606797749979
509	0	integer	0 False	4.47213595499958
510	0	integer	0 False	1.4142135623730951
511	0	integer	0 False	2.0
512	0	integer	0 False	2.23606797749979
513	0	integer	0 False	2.23606797749979
514	0	integer	0 False	0.0
515	0	integer	0 False	2.23606797749979
516	0	integer	0 False	1.4142135623730951
517	0	integer	0 False	2.23606797749979
518	0	integer	0 False	0.0
519	0	integer	0 False	1.0
520	0	integer	0 False	1.4142135623730951
521	0	integer	0 False	2.23606797749979
522	0	integer	0 False	2.23606797749979
523	0	integer	0 False	1.0
524	0	integer	0 False	2.23606797749979
525	0	integer	0 False	1.4142135623730951
526	0	integer	0 False	1.4142135623730951
527	0	integer	0 False	1.4142135623730951
528	0	integer	0 False	1.4142135623730951
529	0	integer	0 False	2.8284271247461903
530	0	integer	0 False	0.0
531	0	integer	0 False	0.0
532	0	integer	0 False	0.0
533	0	integer	0 False	2.23606797749979
534	0	integer	0 False	1.4142135623730951
535	0	integer	0 False	0.0
536	0	integer	0 False	2.23606797749979
537	0	integer	0 False	1.4142135623730951
538	0	integer	0 False	1.4142135623730951
539	0	integer	0 False	0.0
540	0	integer	0 False	1.4142135623730951
541	0	integer	0 False	3.0
542	0	integer	0 False	0.0
543	0	integer	0 False	1.0
544	0	integer	0 False	2.23606797749979
545	0	integer	0 False	2.0
546	0	integer	0 False	2.23606797749979
547	0	integer	0 False	1.0
548	0	integer	0 False	1.0
549	0	integer	0 False	1.0
550	0	integer	0 False	3.605551275463989
551	0	integer	0 False	0.0
552	0	integer	0 False	3.262912440589553
553	0	integer	0 False	2.0
554	0	integer	0 False	1.4142135623730951
555	0	integer	0 False	1.0140065047853537
556	0	integer	0 False	0.9305649441417233
557	0	integer	0 False	3.0
558	0	integer	0 False	2.0
559	0	integer	0 False	5.845189914247101
560	0	integer	0 False	1.4142135623730951
561	0	integer	0 False	2.0
562	0	integer	0 False	1.0
563	0	integer	0 False	2.8284271247461903
564	0	integer	0 False	1.0
565	0	integer	0 False	0.0
566	0	integer	0 False	3.1622776601683795
567	0	integer	0 False	3.1622776601683795
568	0	integer	0 False	2.23606797749979
569	0	integer	0 False	1.0
570	0	integer	0 False	2.0
571	0	integer	0 False	2.0
572	0	integer	0 False	2.0
573	0	integer	0 False	2.23606797749979
574	0	integer	0 False	0.0
575	0	integer	0 False	1.4142135623730951
576	0	integer	0 False	1.0
577	0	integer	0 False	1.4142135623730951
578	0	integer	0 False	2.23606797749979
579	0	integer	0 False	1.4142135623730951
580	0	integer	0 False	2.23606797749979
581	0	integer	0 False	1.1456390079710024
582	0	integer	0 False	2.23606797749979
583	0	integer	0 False	1.6312705535274357
584	0	integer	0 False	1.0566219268244412
585	0	integer	0 False	1.0
586	0	integer	0 False	1.0
587	0	integer	0 False	1.5705430261350066
588	0	integer	0 False	1.676337511321508
589	0	integer	0 False	0.480712890625
590	0	integer	0 False	1.4269338294778782
591	0	integer	0 False	1.353878430208403
592	0	integer	0 False	1.9438362462764855
593	0	integer	0 False	1.4197017247804424
594	0	integer	0 False	1.4142135623730951
595	0	integer	0 False	2.23606797749979
596	0	integer	0 False	3.1622776601683795
597	0	integer	0 False	0.0
598	0	integer	0 False	2.612151024501385
599	0	integer	0 False	1.6245355804979473
600	0	integer	0 False	4.317737706807398
601	0	integer	0 False	1.84684973897159
602	0	integer	0 False	2.5557655444420297
603	0	integer	0 False	0.5830098771932518
604	0	integer	0 False	1.152926466183021
605	0	integer	0 False	3.7571287048512714
606	0	integer	0 False	2.0433392826916337
607	0	integer	0 False	2.3246113718018173
608	0	integer	0 False	2.23606797749979
609	0	integer	0 False	2.23606797749979
610	0	integer	0 False	1.4142135623730951
611	0	integer	0 False	1.0
612	0	integer	0 False	2.23606797749979
613	0	integer	0 False	2.0
614	0	integer	0 False	1.4142135623730951
615	0	integer	0 False	1.0
616	0	integer	0 False	2.23606797749979
617	0	integer	0 False	2.23606797749979
618	0	integer	0 False	1.0
619	0	integer	0 False	2.23606797749979
620	0	integer	0 False	1.0
621	0	integer	0 False	2.0
622	0	integer	0 False	2.23606797749979
623	0	integer	0 False	0.0
624	0	integer	0 False	3.1622776601683795
625	0	integer	0 False	1.0
626	0	integer	0 False	1.0
627	0	integer	0 False	1.4142135623730951
628	0	integer	0 False	1.4142135623730951
629	0	integer	0 False	1.4142135623730951
630	0	integer	0 False	1.4142135623730951
631	0	integer	0 False	10.40928482649801
632	0	integer	0 False	7.746309699276814
633	0	integer	0 False	0.08439820247431
634	0	integer	0 False	0.86053466796875
635	0	integer	0 False	7.645228734949956
636	0	integer	0 False	7.260248099792599
637	0	integer	0 False	0.8864076659558519
638	0	integer	0 False	0.0
639	0	integer	0 False	2.1584625775941957
640	0	integer	0 False	0.0
641	0	integer	0 False	1.0
642	0	integer	0 False	1.0
643	0	integer	0 False	1.0
644	0	integer	0 False	1.0
645	0	integer	0 False	1.0
646	0	integer	0 False	1.4142135623730951
647	0	integer	0 False	1.4142135623730951
648	0	integer	0 False	2.0
649	0	integer	0 False	0.0
650	0	integer	0 False	2.23606797749979
651	0	integer	0 False	1.0
652	0	integer	0 False	3.1622776601683795
653	0	integer	0 False	2.0
654	0	integer	0 False	2.0
655	0	integer	0 False	2.23606797749979
656	0	integer	0 False	2.23606797749979
657	0	integer	0 False	1.4142135623730951
658	0	integer	0 False	1.0
659	0	integer	0 False	1.4142135623730951
660	0	integer	0 False	1.0
661	0	integer	0 False	0.0
662	0	integer	0 False	1.0
663	0	integer	0 False	1.0
664	0	integer	0 False	1.0
665	0	integer	0 False	1.0
666	0	integer	0 False	0.0
667	0	integer	0 False	1.4142135623730951
668	0	integer	0 False	1.4142135623730951
669	0	integer	0 False	0.0
670	0	integer	0 False	1.0
671	0	integer	0 False	0.0
672	0	integer	0 False	2.0
673	0	integer	0 False	1.0
674	0	integer	0 False	1.0
675	0	integer	0 False	1.0
676	0	integer	0 False	2.23606797749979
677	0	integer	0 False	1.0
678	0	integer	0 False	1.4142135623730951
679	0	integer	0 False	1.0
680	0	integer	0 False	2.0
681	0	integer	0 False	1.0
682	0	integer	0 False	2.23606797749979
683	0	integer	0 False	1.8495099819933944
684	0	integer	0 False	1.3160225677144333
685	0	integer	0 False	14.340141952533605
686	0	integer	0 False	1.4142135623730951
687	0	integer	0 False	6.082762530298219
688	0	integer	0 False	2.23606797749979
689	0	integer	0 False	5.6228907541277104
690	0	integer	0 False	2.0
691	0	integer	0 False	1.4142135623730951
692	0	integer	0 False	3.1622776601683795
693	0	integer	0 False	1.4142135623730951
694	0	integer	0 False	3.1622776601683795
695	0	integer	0 False	1.0
696	0	integer	0 False	4.0
697	0	integer	0 False	4.0
698	0	integer	0 False	2.23606797749979
699	0	integer	0 False	1.0441260208188885
700	0	integer	0 False	2.0
701	0	integer	0 False	0.8811530815211607
702	0	integer	0 False	1.0
703	0	integer	0 False	2.7327618949767536
704	0	integer	0 False	1.5127885394492948
705	0	integer	0 False	1.0
706	0	integer	0 False	2.0101903880352867
707	0	integer	0 False	0.2685745544020926
708	0	integer	0 False	3.240389913018596
709	0	integer	0 False	0.8421498314328258
710	0	integer	0 False	0.7708789870584843
711	0	integer	0 False	5.782545201706696
712	0	integer	0 False	0.8689891788049823
713	0	integer	0 False	2.0
714	0	integer	0 False	10.43573675044758
715	0	integer	0 False	4.222758344306053
716	0	integer	0 False	1.8170947833631417
717	0	integer	0 False	1.5620940280059308
718	0	integer	0 False	4.5570311816339935
719	0	integer	0 False	3.1347945337693126
720	0	integer	0 False	3.82943336880787
721	0	integer	0 False	2.0034509694330804
722	0	integer	0 False	1.0
723	0	integer	0 False	0.7022177173937859
724	0	integer	0 False	3.0031977960256397
725	0	integer	0 False	1.2160230142072943
726	0	integer	0 False	0.7084128300826006
727	0	integer	0 False	1.0434348584770494
728	0	integer	0 False	1.1373711367998904
729	0	integer	0 False	3.7958469742236733
730	0	integer	0 False	2.6811914314334433
731	0	integer	0 False	15.714657459682675
732	0	integer	0 False	4.235654575249723
733	0	integer	0 False	2.6828442591629478
734	0	integer	0 False	13.376704832968803
735	0	integer	0 False	4.6002138883562
736	0	integer	0 False	1.4142135623730951
737	0	integer	0 False	2.23606797749979
738	0	integer	0 False	1.4142135623730951
739	0	integer	0 False	1.0
740	0	integer	0 False	3.0
741	0	integer	0 False	1.0
742	0	integer	0 False	0.0
743	0	integer	0 False	3.0
744	0	integer	0 False	0.0
745	0	integer	0 False	0.0
746	0	integer	0 False	1.4142135623730951
747	0	integer	0 False	1.829397412084381
748	0	integer	0 False	0.927686495800287
749	0	integer	0 False	16.030675392241456
750	0	integer	0 False	1.0
751	0	integer	0 False	1.6813833464110184
752	0	integer	0 False	1.4142135623730951
753	0	integer	0 False	1.4142135623730951
754	0	integer	0 False	1.4142135623730951
755	0	integer	0 False	1.4142135623730951
756	0	integer	0 False	3.1622776601683795
757	0	integer	0 False	0.0
758	0	integer	0 False	1.0
759	0	integer	0 False	1.3016549611365362
760	0	integer	0 False	6.394293356628734
761	0	integer	0 False	0.7830226534490571
762	0	integer	0 False	0.0
763	0	integer	0 False	6.7379209602177275
764	0	integer	0 False	0.47836219215622644
765	0	integer	0 False	1.0
766	0	integer	0 False	1.0
767	0	integer	0 False	1.0
768	0	integer	0 False	1.4142135623730951
769	0	integer	0 False	0.0
770	0	integer	0 False	1.4142135623730951
771	0	integer	0 False	0.0
772	0	integer	0 False	2.23606797749979
773	0	integer	0 False	1.4142135623730951
774	0	integer	0 False	2.23606797749979
775	0	integer	0 False	0.0
776	0	integer	0 False	1.4142135623730951
777	0	integer	0 False	2.0
778	0	integer	0 False	2.23606797749979
779	0	integer	0 False	0.0
780	0	integer	0 False	1.0
781	0	integer	0 False	2.0
782	0	integer	0 False	1.0
783	0	integer	0 False	1.0
784	0	integer	0 False	2.23606797749979
785	0	integer	0 False	1.4142135623730951
786	0	integer	0 False	1.0
787	0	integer	0 False	1.4142135623730951
788	0	integer	0 False	1.0
789	0	integer	0 False	1.0
790	0	integer	0 False	1.4142135623730951
791	0	integer	0 False	1.0
792	0	integer	0 False	7.230069137697293
793	0	integer	0 False	2.3129069732375758
794	0	integer	0 False	2.23606797749979
795	0	integer	0 False	3.840294769867827
796	0	integer	0 False	2.8284271247461903
797	0	integer	0 False	2.23606797749979
798	0	integer	0 False	1.0
799	0	integer	0 False	1.0
800	0	integer	0 False	1.0
801	0	integer	0 False	1.0
802	0	integer	0 False	2.0
803	0	integer	0 False	2.23606797749979
804	0	integer	0 False	0.0
805	0	integer	0 False	0.0
806	0	integer	0 False	1.4142135623730951
807	0	integer	0 False	1.0
808	0	integer	0 False	1.0
809	0	integer	0 False	2.23606797749979
810	0	integer	0 False	3.0
811	0	integer	0 False	6.315839021275589
812	0	integer	0 False	6.382201474337125
813	0	integer	0 False	17.419647304960545
814	0	integer	0 False	7.058496968809695
815	0	integer	0 False	0.5828817956601099
816	0	integer	0 False	1.286738022299191
817	0	integer	0 False	4.0
818	0	integer	0 False	1.0
819	0	integer	0 False	2.02394304256648
820	0	integer	0 False	1.7759832939407176
821	0	integer	0 False	1.6475039198378187
822	0	integer	0 False	3.1622776601683795
823	0	integer	0 False	3.0563514587927667
824	0	integer	0 False	3.1622776601683795
825	0	integer	0 False	7.211102550927978
826	0	integer	0 False	2.23606797749979
827	0	integer	0 False	0.7471445296079584
828	0	integer	0 False	2.7314042446975697
829	0	integer	0 False	3.2234023210253433
830	0	integer	0 False	1.0448132042048428
831	0	integer	0 False	4.47213595499958
832	0	integer	0 False	3.8903624070648304
833	0	integer	0 False	2.3299223874974797
834	0	integer	0 False	1.89910888671875
835	0	integer	0 False	2.23606797749979
836	0	integer	0 False	1.0
837	0	integer	0 False	0.0
838	0	integer	0 False	4.058660925312923
839	0	integer	0 False	3.4280402071549854
840	0	integer	0 False	0.23561987283488656
841	0	integer	0 False	2.0092837981332448
842	0	integer	0 False	1.0
843	0	integer	0 False	1.4142135623730951
844	0	integer	0 False	1.4142135623730951
845	0	integer	0 False	1.0
846	0	integer	0 False	1.4142135623730951
847	0	integer	0 False	2.23606797749979
848	0	integer	0 False	1.0
849	0	integer	0 False	2.0
850	0	integer	0 False	1.0
851	0	integer	0 False	2.3919287014296278
852	0	integer	0 False	0.5799580499530017
853	0	integer	0 False	1.2559253688635945
854	0	integer	0 False	1.0
855	0	integer	0 False	1.0
856	0	integer	0 False	2.23606797749979
857	0	integer	0 False	1.4142135623730951
858	0	integer	0 False	1.0
859	0	integer	0 False	2.8284271247461903
860	0	integer	0 False	2.23606797749979
861	0	integer	0 False	0.0
862	0	integer	0 False	1.4142135623730951
863	0	integer	0 False	1.0
864	0	integer	0 False	1.0
865	0	integer	0 False	1.0
866	0	integer	0 False	2.0
867	0	integer	0 False	1.4142135623730951
868	0	integer	0 False	2.0
869	0	integer	0 False	1.0
870	0	integer	0 False	1.4142135623730951
871	0	integer	0 False	2.8284271247461903
872	0	integer	0 False	2.23606797749979
873	0	integer	0 False	2.0
874	0	integer	0 False	1.0
875	0	integer	0 False	2.23606797749979
876	0	integer	0 False	1.0
877	0	integer	0 False	2.0
878	0	integer	0 False	0.0
879	0	integer	0 False	2.23606797749979
880	0	integer	0 False	1.4142135623730951
881	0	integer	0 False	2.0
882	0	integer	0 False	2.23606797749979
883	0	integer	0 False	1.0
884	0	integer	0 False	2.23606797749979
885	0	integer	0 False	0.0
886	0	integer	0 False	2.0
887	0	integer	0 False	1.4417476921612091
888	0	integer	0 False	1.6749811276953535
889	0	integer	0 False	0.0
890	0	integer	0 False	1.0
891	0	integer	0 False	0.0
892	0	integer	0 False	3.0
893	0	integer	0 False	3.1622776601683795
894	0	integer	0 False	0.0
895	0	integer	0 False	1.0
896	0	integer	0 False	1.0
897	0	integer	0 False	1.0
898	0	integer	0 False	0.0
899	0	integer	0 False	1.0
900	0	integer	0 False	1.0
901	0	integer	0 False	1.4142135623730951
902	0	integer	0 False	1.0
903	0	integer	0 False	2.23606797749979
904	0	integer	0 False	1.0
905	0	integer	0 False	0.0
906	0	integer	0 False	1.4142135623730951
907	0	integer	0 False	1.0
908	0	integer	0 False	1.4142135623730951
909	0	integer	0 False	1.4142135623730951
910	0	integer	0 False	1.0
911	0	integer	0 False	0.0
912	0	integer	0 False	1.0
913	0	integer	0 False	4.47213595499958
914	0	integer	0 False	0.0
915	0	integer	0 False	1.0
916	0	integer	0 False	1.4142135623730951
917	0	integer	0 False	1.4142135623730951
918	0	integer	0 False	1.0
919	0	integer	0 False	6.1284528790117045
920	0	integer	0 False	4.355852086791731
921	0	integer	0 False	14.291453138504393
922	0	integer	0 False	2.23606797749979
923	0	integer	0 False	9.433981132056603
924	0	integer	0 False	11.131909923294032
925	0	integer	0 False	51.50804947829613
926	0	integer	0 False	1.4142135623730951
927	0	integer	0 False	1.0
928	0	integer	0 False	1.0
929	0	integer	0 False	2.23606797749979
930	0	integer	0 False	0.0
931	0	integer	0 False	0.0
932	0	integer	0 False	1.0
933	0	integer	0 False	1.0
934	0	integer	0 False	1.0
935	0	integer	0 False	4.47213595499958
936	0	integer	0 False	1.0
937	0	integer	0 False	1.4142135623730951
938	0	integer	0 False	1.4142135623730951
939	0	integer	0 False	1.0
940	0	integer	0 False	2.23606797749979
941	0	integer	0 False	1.0
942	0	integer	0 False	1.0
943	0	integer	0 False	1.4142135623730951
944	0	integer	0 False	1.0
945	0	integer	0 False	2.0
946	0	integer	0 False	1.0
947	0	integer	0 False	1.0
948	0	integer	0 False	2.0
949	0	integer	0 False	1.0
950	0	integer	0 False	0.0
951	0	integer	0 False	2.23606797749979
952	0	integer	0 False	2.23606797749979
953	0	integer	0 False	1.4142135623730951
954	0	integer	0 False	1.4142135623730951
955	0	integer	0 False	1.0
956	0	integer	0 False	1.4142135623730951
957	0	integer	0 False	0.0
958	0	integer	0 False	0.0
959	0	integer	0 False	2.0
960	0	integer	0 False	1.0
961	0	integer	0 False	1.4142135623730951
962	0	integer	0 False	2.0
963	0	integer	0 False	1.0
964	0	integer	0 False	2.0
965	0	integer	0 False	1.0
966	0	integer	0 False	2.0
967	0	integer	0 False	3.1622776601683795
968	0	integer	0 False	1.4142135623730951
969	0	integer	0 False	0.0
970	0	integer	0 False	1.4142135623730951
971	0	integer	0 False	2.8284271247461903
972	0	integer	0 False	1.4142135623730951
973	0	integer	0 False	2.23606797749979
974	0	integer	0 False	0.0
975	0	integer	0 False	1.4142135623730951
976	0	integer	0 False	0.0
977	0	integer	0 False	1.4142135623730951
978	0	integer	0 False	1.0
979	0	integer	0 False	1.4142135623730951
980	0	integer	0 False	0.0
981	0	integer	0 False	1.0
982	0	integer	0 False	2.23606797749979
983	0	integer	0 False	3.605551275463989
984	0	integer	0 False	1.0
985	0	integer	0 False	2.0
986	0	integer	0 False	1.4142135623730951
987	0	integer	0 False	1.0
988	0	integer	0 False	2.0
989	0	integer	0 False	1.4142135623730951
990	0	integer	0 False	0.0
991	0	integer	0 False	1.0
992	0	integer	0 False	0.0
993	0	integer	0 False	1.0
994	0	integer	0 False	0.0
995	0	integer	0 False	0.0
996	0	integer	0 False	1.0
997	0	integer	0 False	5.0
998	0	integer	0 False	1.0
999	0	integer	0 False	1.4142135623730951
1000	0	integer	0 False	1.4142135623730951
1001	0	integer	0 False	5.385164807134504
1002	0	integer	0 False	8.587593088373762
1003	0	integer	0 False	1.4142135623730951
1004	0	integer	0 False	1.0
1005	0	integer	0 False	1.4142135623730951
1006	0	integer	0 False	1.4142135623730951
1007	0	integer	0 False	6.0
1008	0	integer	0 False	23.360019272538253
1009	0	integer	0 False	20.6468228330005
1010	0	integer	0 False	1.0
1011	0	integer	0 False	1.0
1012	0	integer	0 False	2.23606797749979
1013	0	integer	0 False	1.0
1014	0	integer	0 False	1.0
1015	0	integer	0 False	2.23606797749979
1016	0	integer	0 False	2.0
1017	0	integer	0 False	2.0
1018	0	integer	0 False	2.23606797749979
1019	0	integer	0 False	0.24283519781774604
1020	0	integer	0 False	5.6364097218069835
1021	0	integer	0 False	2.0440343030028076
1022	0	integer	0 False	0.0
1023	0	integer	0 False	1.0
1024	0	integer	0 False	1.0
1025	0	integer	0 False	1.0
1026	0	integer	0 False	1.0
1027	0	integer	0 False	2.8284271247461903
1028	0	integer	0 False	0.0
1029	0	integer	0 False	1.0
1030	0	integer	0 False	1.0
1031	0	integer	0 False	1.0
1032	0	integer	0 False	0.0
1033	0	integer	0 False	2.23606797749979
1034	0	integer	0 False	2.8284271247461903
1035	0	integer	0 False	2.0
1036	0	integer	0 False	1.4142135623730951
1037	0	integer	0 False	1.0
1038	0	integer	0 False	1.0
1039	0	integer	0 False	3.0
1040	0	integer	0 False	2.23606797749979
1041	0	integer	0 False	0.0
1042	0	integer	0 False	1.0
1043	0	integer	0 False	1.0
1044	0	integer	0 False	1.4142135623730951
1045	0	integer	0 False	1.4142135623730951
1046	0	integer	0 False	1.0
1047	0	integer	0 False	2.23606797749979
1048	0	integer	0 False	5.0
1049	0	integer	0 False	1.0
1050	0	integer	0 False	2.23606797749979
1051	0	integer	0 False	1.4142135623730951
1052	0	integer	0 False	2.23606797749979
1053	0	integer	0 False	2.338255651001218
1054	0	integer	0 False	0.0
1055	0	integer	0 False	2.8284271247461903
1056	0	integer	0 False	0.0
1057	0	integer	0 False	1.0
1058	0	integer	0 False	1.0
1059	0	integer	0 False	2.23606797749979
1060	0	integer	0 False	1.4142135623730951
1061	0	integer	0 False	1.0
1062	0	integer	0 False	0.0
1063	0	integer	0 False	1.0
1064	0	integer	0 False	1.0
1065	0	integer	0 False	2.0
1066	0	integer	0 False	1.4142135623730951
1067	0	integer	0 False	2.0
1068	0	integer	0 False	2.0
1069	0	integer	0 False	1.0
1070	0	integer	0 False	1.0
1071	0	integer	0 False	1.4142135623730951
1072	0	integer	0 False	0.0
1073	0	integer	0 False	0.0
1074	0	integer	0 False	0.0
1075	0	integer	0 False	2.0
1076	0	integer	0 False	5.0990195135927845
1077	0	integer	0 False	2.8284271247461903
1078	0	integer	0 False	1.4142135623730951
1079	0	integer	0 False	2.23606797749979
1080	0	integer	0 False	1.4142135623730951
1081	0	integer	0 False	1.4142135623730951
1082	0	integer	0 False	1.4142135623730951
1083	0	integer	0 False	0.0
1084	0	integer	0 False	1.4142135623730951
1085	0	integer	0 False	1.0
1086	0	integer	0 False	1.0
1087	0	integer	0 False	2.0
1088	0	integer	0 False	0.9806525164579583
1089	0	integer	0 False	2.4436792172701813
1090	0	integer	0 False	1.4142135623730951
1091	0	integer	0 False	1.0096784531912062
1092	0	integer	0 False	2.23606797749979
1093	0	integer	0 False	1.0
1094	0	integer	0 False	1.4142135623730951
1095	0	integer	0 False	1.10089111328125
1096	0	integer	0 False	4.47213595499958
1097	0	integer	0 False	2.0
1098	0	integer	0 False	2.23606797749979
1099	0	integer	0 False	2.452919173299758
1100	0	integer	0 False	3.4285329965677454
1101	0	integer	0 False	1.0
1102	0	integer	0 False	2.23606797749979
1103	0	integer	0 False	2.23606797749979
1104	0	integer	0 False	1.7625231275706617
1105	0	integer	0 False	1.5543126850733386
1106	0	integer	0 False	1.0
1107	0	integer	0 False	1.4142135623730951
1108	0	integer	0 False	0.8449944313991969
1109	0	integer	0 False	2.0
1110	0	integer	0 False	1.4142135623730951
1111	0	integer	0 False	3.990435516555186
1112	0	integer	0 False	2.1653172822241014
1113	0	integer	0 False	0.0
1114	0	integer	0 False	1.4142135623730951
1115	0	integer	0 False	19.969938688150986
1116	0	integer	0 False	25.04187712132341
1117	0	integer	0 False	12.035823045789467
1118	0	integer	0 False	1.0
1119	0	integer	0 False	3.605551275463989
1120	0	integer	0 False	2.0
1121	0	integer	0 False	1.0
1122	0	integer	0 False	1.0
1123	0	integer	0 False	1.0
1124	0	integer	0 False	2.0
1125	0	integer	0 False	1.4142135623730951
1126	0	integer	0 False	0.0
1127	0	integer	0 False	1.0
1128	0	integer	0 False	2.23606797749979
1129	0	integer	0 False	0.0
1130	0	integer	0 False	2.23606797749979
1131	0	integer	0 False	0.8243193406829105
1132	0	integer	0 False	2.526268749951394
1133	0	integer	0 False	19.661494741790644
1134	0	integer	0 False	1.4142135623730951
1135	0	integer	0 False	10.429811927014912
1136	0	integer	0 False	3.0
1137	0	integer	0 False	1.4142135623730951
1138	0	integer	0 False	1.4142135623730951
1139	0	integer	0 False	1.6533197415909116
1140	0	integer	0 False	3.832499926139424
1141	0	integer	0 False	2.23606797749979
1142	0	integer	0 False	2.23606797749979
1143	0	integer	0 False	1.9110931460500544
1144	0	integer	0 False	4.874371359887241
1145	0	integer	0 False	1.5702065510972416
1146	0	integer	0 False	2.8284271247461903
1147	0	integer	0 False	22.702860565317284
1148	0	integer	0 False	24.36577413056786
1149	0	integer	0 False	55.46041184530967
1150	0	integer	0 False	0.7227810036741987
1151	0	integer	0 False	2.0
1152	0	integer	0 False	1.4142135623730951
1153	0	integer	0 False	1.0
1154	0	integer	0 False	1.0
1155	0	integer	0 False	1.0
1156	0	integer	0 False	2.23606797749979
1157	0	integer	0 False	0.0
1158	0	integer	0 False	1.4142135623730951
1159	0	integer	0 False	2.8284271247461903
1160	0	integer	0 False	1.0
1161	0	integer	0 False	3.0
1162	0	integer	0 False	2.23606797749979
1163	0	integer	0 False	1.0
1164	0	integer	0 False	1.4142135623730951
1165	0	integer	0 False	0.0
1166	0	integer	0 False	2.0
1167	0	integer	0 False	1.0
1168	0	integer	0 False	1.4142135623730951
1169	0	integer	0 False	2.0
1170	0	integer	0 False	1.0
1171	0	integer	0 False	4.0
1172	0	integer	0 False	1.4142135623730951
1173	0	integer	0 False	2.0
1174	0	integer	0 False	0.0
1175	0	integer	0 False	1.4142135623730951
1176	0	integer	0 False	0.0
1177	0	integer	0 False	1.0
1178	0	integer	0 False	2.23606797749979
1179	0	integer	0 False	2.23606797749979
1180	0	integer	0 False	1.4142135623730951
1181	0	integer	0 False	2.23606797749979
1182	0	integer	0 False	1.0
1183	0	integer	0 False	0.0
1184	0	integer	0 False	2.0
1185	0	integer	0 False	1.4142135623730951
1186	0	integer	0 False	0.0
1187	0	integer	0 False	2.0
1188	0	integer	0 False	1.0
1189	0	integer	0 False	0.0
1190	0	integer	0 False	1.4142135623730951
1191	0	integer	0 False	1.4142135623730951
1192	0	integer	0 False	1.4142135623730951
1193	0	integer	0 False	0.0
1194	0	integer	0 False	1.0
1195	0	integer	0 False	1.0
1196	0	integer	0 False	0.0
1197	0	integer	0 False	1.0
1198	0	integer	0 False	2.23606797749979
1199	0	integer	0 False	1.0
1200	0	integer	0 False	0.0
1201	0	integer	0 False	2.0
1202	0	integer	0 False	1.0
1203	0	integer	0 False	1.0
1204	0	integer	0 False	2.23606797749979
1205	0	integer	0 False	1.0
1206	0	integer	0 False	2.23606797749979
1207	0	integer	0 False	1.0
1208	0	integer	0 False	0.0
1209	0	integer	0 False	1.0
1210	0	integer	0 False	1.0
1211	0	integer	0 False	2.23606797749979
1212	0	integer	0 False	1.0
1213	0	integer	0 False	1.4142135623730951
1214	0	integer	0 False	1.0
1215	0	integer	0 False	1.4142135623730951
1216	0	integer	0 False	1.0
1217	0	integer	0 False	3.605551275463989
1218	0	integer	0 False	2.0
1219	0	integer	0 False	0.0
1220	0	integer	0 False	1.0
1221	0	integer	0 False	1.4142135623730951
1222	0	integer	0 False	2.0
1223	0	integer	0 False	1.0
1224	0	integer	0 False	1.4142135623730951
1225	0	integer	0 False	1.0
1226	0	integer	0 False	2.0
1227	0	integer	0 False	0.0
1228	0	integer	0 False	2.23606797749979
1229	0	integer	0 False	2.23606797749979
1230	0	integer	0 False	1.4142135623730951
1231	0	integer	0 False	1.0
1232	0	integer	0 False	2.23606797749979
1233	0	integer	0 False	3.1622776601683795
1234	0	integer	0 False	0.0
1235	0	integer	0 False	1.4142135623730951
1236	0	integer	0 False	1.4142135623730951
1237	0	integer	0 False	1.4142135623730951
1238	0	integer	0 False	0.0
1239	0	integer	0 False	2.0
1240	0	integer	0 False	2.23606797749979
1241	0	integer	0 False	1.0
1242	0	integer	0 False	2.23606797749979
1243	0	integer	0 False	1.0
1244	0	integer	0 False	1.0
1245	0	integer	0 False	2.23606797749979
1246	0	integer	0 False	1.0
1247	0	integer	0 False	1.4142135623730951
1248	0	integer	0 False	1.0
1249	0	integer	0 False	1.6130257264444787
1250	0	integer	0 False	0.8396850397163027
1251	0	integer	0 False	1.1095426459641122
1252	0	integer	0 False	1.3115751781042873
1253	0	integer	0 False	1.8971840290248483
1254	0	integer	0 False	1.4142135623730951
1255	0	integer	0 False	2.721622266598265
1256	0	integer	0 False	2.943824729380921
1257	0	integer	0 False	0.6433690111495955
1258	0	integer	0 False	3.0
1259	0	integer	0 False	1.752423450296138
1260	0	integer	0 False	2.509656440089102
1261	0	integer	0 False	0.7718112483958643
1262	0	integer	0 False	2.23606797749979
1263	0	integer	0 False	8.94427190999916
1264	0	integer	0 False	10.854451457851114
1265	0	integer	0 False	26.576401583238205
1266	0	integer	0 False	0.2685745544020926
1267	0	integer	0 False	0.7922466506638183
1268	0	integer	0 False	0.6209435138797531
1269	0	integer	0 False	1.0538297684300564
1270	0	integer	0 False	0.6989655583209021
1271	0	integer	0 False	1.189379795544553
1272	0	integer	0 False	4.370636638804933
1273	0	integer	0 False	0.47031492037799844
1274	0	integer	0 False	1.3992448013602523
1275	0	integer	0 False	3.444275126908686
1276	0	integer	0 False	2.1838716597102477
1277	0	integer	0 False	17.01638829479362
1278	0	integer	0 False	1.398079257836793
1279	0	integer	0 False	1.332163091746228
1280	0	integer	0 False	1.0
1281	0	integer	0 False	1.0
1282	0	integer	0 False	1.4142135623730951
1283	0	integer	0 False	1.0
1284	0	integer	0 False	1.4142135623730951
1285	0	integer	0 False	1.4142135623730951
1286	0	integer	0 False	1.4142135623730951
1287	0	integer	0 False	1.0
1288	0	integer	0 False	1.4142135623730951
1289	0	integer	0 False	0.0
1290	0	integer	0 False	1.4142135623730951
1291	0	integer	0 False	0.0
1292	0	integer	0 False	2.23606797749979
1293	0	integer	0 False	4.0
1294	0	integer	0 False	1.0
1295	0	integer	0 False	1.4142135623730951
1296	0	integer	0 False	2.8284271247461903
1297	0	integer	0 False	0.0
1298	0	integer	0 False	1.4142135623730951
1299	0	integer	0 False	1.4142135623730951
1300	0	integer	0 False	1.0
1301	0	integer	0 False	1.0
1302	0	integer	0 False	1.0
1303	0	integer	0 False	0.0
1304	0	integer	0 False	1.0
1305	0	integer	0 False	2.23606797749979
1306	0	integer	0 False	1.0
1307	0	integer	0 False	1.4142135623730951
1308	0	integer	0 False	10.816653826391969
1309	0	integer	0 False	1.0
1310	0	integer	0 False	2.0
1311	0	integer	0 False	1.0
1312	0	integer	0 False	2.3980385502119113
1313	0	integer	0 False	1.6749811276953535
1314	0	integer	0 False	0.3374440116382102
1315	0	integer	0 False	0.0
1316	0	integer	0 False	1.4142135623730951
1317	0	integer	0 False	2.0
1318	0	integer	0 False	0.0
1319	0	integer	0 False	4.123105625617661
1320	0	integer	0 False	0.13946533203125
1321	0	integer	0 False	1.5201243616552647
1322	0	integer	0 False	1.0
1323	0	integer	0 False	1.0
1324	0	integer	0 False	1.4142135623730951
1325	0	integer	0 False	1.4142135623730951
1326	0	integer	0 False	1.4142135623730951
1327	0	integer	0 False	1.0
1328	0	integer	0 False	3.365775487151157
1329	0	integer	0 False	4.478659577183538
1330	0	integer	0 False	1.0
1331	0	integer	0 False	2.145226961991536
1332	0	integer	0 False	1.0
1333	0	integer	0 False	4.167284261758685
1334	0	integer	0 False	1.0
1335	0	integer	0 False	0.0
1336	0	integer	0 False	2.0
1337	0	integer	0 False	1.0
1338	0	integer	0 False	1.0
1339	0	integer	0 False	1.4142135623730951
1340	0	integer	0 False	3.0
1341	0	integer	0 False	1.0
1342	0	integer	0 False	1.4142135623730951
1343	0	integer	0 False	0.0
1344	0	integer	0 False	0.0
1345	0	integer	0 False	1.0
1346	0	integer	0 False	1.4142135623730951
1347	0	integer	0 False	1.0
1348	0	integer	0 False	2.23606797749979
1349	0	integer	0 False	1.0
1350	0	integer	0 False	1.0
1351	0	integer	0 False	2.23606797749979
1352	0	integer	0 False	3.0
1353	0	integer	0 False	1.0
1354	0	integer	0 False	2.0
1355	0	integer	0 False	0.0
1356	0	integer	0 False	3.1622776601683795
1357	0	integer	0 False	0.0
1358	0	integer	0 False	2.0
1359	0	integer	0 False	2.0
1360	0	integer	0 False	0.0
1361	0	integer	0 False	1.4142135623730951
1362	0	integer	0 False	1.0
1363	0	integer	0 False	1.0
1364	0	integer	0 False	0.0
1365	0	integer	0 False	1.4142135623730951
1366	0	integer	0 False	1.4142135623730951
1367	0	integer	0 False	1.0
1368	0	integer	0 False	2.0
1369	0	integer	0 False	1.0
1370	0	integer	0 False	1.0
1371	0	integer	0 False	1.0
1372	0	integer	0 False	1.4142135623730951
1373	0	integer	0 False	1.0
1374	0	integer	0 False	1.4142135623730951
1375	0	integer	0 False	1.0
1376	0	integer	0 False	1.4142135623730951
1377	0	integer	0 False	3.0
1378	0	integer	0 False	1.0
1379	0	integer	0 False	2.23606797749979
1380	0	integer	0 False	1.4142135623730951
1381	0	integer	0 False	1.0
1382	0	integer	0 False	1.0
1383	0	integer	0 False	1.0
1384	0	integer	0 False	1.886758185896599
1385	0	integer	0 False	1.6088044002237625
1386	0	integer	0 False	1.4142135623730951
1387	0	integer	0 False	2.23606797749979
1388	0	integer	0 False	1.0
1389	0	integer	0 False	1.4142135623730951
1390	0	integer	0 False	2.23606797749979
1391	0	integer	0 False	2.0
1392	0	integer	0 False	1.0
1393	0	integer	0 False	2.0
1394	0	integer	0 False	1.0
1395	0	integer	0 False	1.6699269305816329
1396	0	integer	0 False	4.202507190895516
1397	0	integer	0 False	9.8597514087098
1398	0	integer	0 False	1.4142135623730951
1399	0	integer	0 False	0.0
1400	0	integer	0 False	1.0
1401	0	integer	0 False	1.4142135623730951
1402	0	integer	0 False	1.4142135623730951
1403	0	integer	0 False	1.4142135623730951
1404	0	integer	0 False	1.4142135623730951
1405	0	integer	0 False	1.4142135623730951
1406	0	integer	0 False	2.0
1407	0	integer	0 False	1.4142135623730951
1408	0	integer	0 False	1.0
1409	0	integer	0 False	2.8284271247461903
1410	0	integer	0 False	1.0
1411	0	integer	0 False	0.0
1412	0	integer	0 False	0.0
1413	0	integer	0 False	1.0
1414	0	integer	0 False	2.23606797749979
1415	0	integer	0 False	2.0
1416	0	integer	0 False	2.23606797749979
1417	0	integer	0 False	0.0
1418	0	integer	0 False	0.0
1419	0	integer	0 False	1.0
1420	0	integer	0 False	1.4142135623730951
1421	0	integer	0 False	1.4142135623730951
1422	0	integer	0 False	1.0
1423	0	integer	0 False	2.23606797749979
1424	0	integer	0 False	1.4142135623730951
1425	0	integer	0 False	4.242640687119285
1426	0	integer	0 False	1.4142135623730951
1427	0	integer	0 False	3.0
1428	0	integer	0 False	1.0
1429	0	integer	0 False	1.0
1430	0	integer	0 False	1.0
1431	0	integer	0 False	2.0
1432	0	integer	0 False	1.0
1433	0	integer	0 False	2.0
1434	0	integer	0 False	1.0
1435	0	integer	0 False	1.0
1436	0	integer	0 False	1.0
1437	0	integer	0 False	1.4142135623730951
1438	0	integer	0 False	0.0
1439	0	integer	0 False	1.4142135623730951
1440	0	integer	0 False	1.4142135623730951
1441	0	integer	0 False	1.4142135623730951
1442	0	integer	0 False	1.0
1443	0	integer	0 False	1.0
1444	0	integer	0 False	2.0663153442693694
1445	0	integer	0 False	1.6749811276953535
1446	0	integer	0 False	1.8016528820093833
1447	0	integer	0 False	2.6436681136524425
1448	0	integer	0 False	1.4142135623730951
1449	0	integer	0 False	2.0
1450	0	integer	0 False	5.407697843778941
1451	0	integer	0 False	2.23606797749979
1452	0	integer	0 False	1.0
1453	0	integer	0 False	0.0
1454	0	integer	0 False	3.0
1455	0	integer	0 False	4.076361149139195
1456	0	integer	0 False	2.7517938009374387
1457	0	integer	0 False	6.863797842096137
1458	0	integer	0 False	1.0
1459	0	integer	0 False	1.0
1460	0	integer	0 False	0.0
1461	0	integer	0 False	1.4142135623730951
1462	0	integer	0 False	5.027599808830658
1463	0	integer	0 False	1.4677034242064864
1464	0	integer	0 False	1.8016528820093833
1465	0	integer	0 False	2.23606797749979
1466	0	integer	0 False	1.5880276646078249
1467	0	integer	0 False	1.3621585976125272
1468	0	integer	0 False	1.936718654363275
1469	0	integer	0 False	0.680017163909421
1470	0	integer	0 False	1.0
1471	0	integer	0 False	1.0
1472	0	integer	0 False	1.0
1473	0	integer	0 False	0.0
1474	0	integer	0 False	1.0
1475	0	integer	0 False	1.0
1476	0	integer	0 False	1.0
1477	0	integer	0 False	1.4142135623730951
1478	0	integer	0 False	1.0
1479	0	integer	0 False	1.4142135623730951
1480	0	integer	0 False	0.0
1481	0	integer	0 False	1.0
1482	0	integer	0 False	1.0
1483	0	integer	0 False	1.0
1484	0	integer	0 False	1.4142135623730951
1485	0	integer	0 False	1.0
1486	0	integer	0 False	1.4142135623730951
1487	0	integer	0 False	2.23606797749979
1488	0	integer	0 False	1.0
1489	0	integer	0 False	2.23606797749979
1490	0	integer	0 False	2.23606797749979
1491	0	integer	0 False	1.4142135623730951
1492	0	integer	0 False	1.4142135623730951
1493	0	integer	0 False	0.0
1494	0	integer	0 False	2.0
1495	0	integer	0 False	2.23606797749979
1496	0	integer	0 False	0.0
1497	0	integer	0 False	1.0
1498	0	integer	0 False	2.2789306640625
1499	0	integer	0 False	3.1506609148893525
1500	0	integer	0 False	2.0
1501	0	integer	0 False	1.4142135623730951
1502	0	integer	0 False	2.8284271247461903
1503	0	integer	0 False	1.0
1504	0	integer	0 False	0.569732666015625
1505	0	integer	0 False	1.0
1506	0	integer	0 False	1.0
1507	0	integer	0 False	0.2403564453125
1508	0	integer	0 False	0.569732666015625
1509	0	integer	0 False	1.0
1510	0	integer	0 False	3.0
1511	0	integer	0 False	3.5730566721786365
1512	0	integer	0 False	1.659200901706411
1513	0	integer	0 False	0.6580911832641017
1514	0	integer	0 False	1.0
1515	0	integer	0 False	1.9526663265478041
1516	0	integer	0 False	4.47213595499958
1517	0	integer	0 False	1.0
1518	0	integer	0 False	1.7197162388497664
1519	0	integer	0 False	1.8398128398598905
1520	0	integer	0 False	5.385164807134504
1521	0	integer	0 False	0.329376220703125
1522	0	integer	0 False	0.0
1523	0	integer	0 False	3.181053520916083
1524	0	integer	0 False	3.2496388269351497
1525	0	integer	0 False	0.8730339677654487
1526	0	integer	0 False	1.0
1527	0	integer	0 False	3.9017890478893587
1528	0	integer	0 False	2.3959305569454976
1529	0	integer	0 False	1.042489146033451
1530	0	integer	0 False	2.0
1531	0	integer	0 False	1.0
1532	0	integer	0 False	1.0
1533	0	integer	0 False	3.0
1534	0	integer	0 False	1.0
1535	0	integer	0 False	2.0
1536	0	integer	0 False	1.0
1537	0	integer	0 False	1.4142135623730951
1538	0	integer	0 False	1.4142135623730951
1539	0	integer	0 False	1.0
1540	0	integer	0 False	0.0
1541	0	integer	0 False	0.0
1542	0	integer	0 False	1.0
1543	0	integer	0 False	3.0
1544	0	integer	0 False	2.8284271247461903
1545	0	integer	0 False	2.0
1546	0	integer	0 False	1.4142135623730951
1547	0	integer	0 False	1.4142135623730951
1548	0	integer	0 False	2.8284271247461903
1549	0	integer	0 False	1.0
1550	0	integer	0 False	1.4142135623730951
1551	0	integer	0 False	11.180339887498949
1552	0	integer	0 False	1.0
1553	0	integer	0 False	2.23606797749979
1554	0	integer	0 False	1.0
1555	0	integer	0 False	0.0
1556	0	integer	0 False	2.23606797749979
1557	0	integer	0 False	1.0
1558	0	integer	0 False	1.4142135623730951
1559	0	integer	0 False	2.23606797749979
1560	0	integer	0 False	2.23606797749979
1561	0	integer	0 False	3.0
1562	0	integer	0 False	1.0
1563	0	integer	0 False	3.605551275463989
1564	0	integer	0 False	2.23606797749979
1565	0	integer	0 False	1.0
1566	0	integer	0 False	1.0
1567	0	integer	0 False	3.605551275463989
1568	0	integer	0 False	1.4142135623730951
1569	0	integer	0 False	2.8284271247461903
1570	0	integer	0 False	2.8284271247461903
1571	0	integer	0 False	2.8284271247461903
1572	0	integer	0 False	3.605551275463989
1573	0	integer	0 False	2.23606797749979
1574	0	integer	0 False	1.3016549611365362
1575	0	integer	0 False	4.181718358979259
1576	0	integer	0 False	3.605551275463989
1577	0	integer	0 False	1.8273992066909754
1578	0	integer	0 False	5.118809453610373
1579	0	integer	0 False	13.987749125514926
1580	0	integer	0 False	24.040742961176996
1581	0	integer	0 False	1.0203642485219415
1582	0	integer	0 False	2.23606797749979
1583	0	integer	0 False	1.4142135623730951
1584	0	integer	0 False	4.361786902031205
1585	0	integer	0 False	7.209318621366813
1586	0	integer	0 False	1.0
1587	0	integer	0 False	3.0393739987481916
1588	0	integer	0 False	11.020878755608097
1589	0	integer	0 False	2.662409047818854
1590	0	integer	0 False	5.0
1591	0	integer	0 False	9.486832980505138
1592	0	integer	0 False	4.0
1593	0	integer	0 False	1.4142135623730951
1594	0	integer	0 False	3.2089360216645653
1595	0	integer	0 False	7.693548085560757
1596	0	integer	0 False	0.6763532904392063
1597	0	integer	0 False	1.0
1598	0	integer	0 False	0.0
1599	0	integer	0 False	1.0
1600	0	integer	0 False	1.4142135623730951
1601	0	integer	0 False	3.0
1602	0	integer	0 False	0.0
1603	0	integer	0 False	1.4142135623730951
1604	0	integer	0 False	1.0
1605	0	integer	0 False	0.0
1606	0	integer	0 False	1.4142135623730951
1607	0	integer	0 False	1.0
1608	0	integer	0 False	2.23606797749979
1609	0	integer	0 False	2.0
1610	0	integer	0 False	1.0
1611	0	integer	0 False	3.1622776601683795
1612	0	integer	0 False	1.0
1613	0	integer	0 False	1.0
1614	0	integer	0 False	1.0
1615	0	integer	0 False	3.0
1616	0	integer	0 False	1.4142135623730951
1617	0	integer	0 False	1.4142135623730951
1618	0	integer	0 False	3.1622776601683795
1619	0	integer	0 False	1.0
1620	0	integer	0 False	2.23606797749979
1621	0	integer	0 False	1.0
1622	0	integer	0 False	1.4142135623730951
1623	0	integer	0 False	1.4142135623730951
1624	0	integer	0 False	2.0
1625	0	integer	0 False	1.4142135623730951
1626	0	integer	0 False	1.0
1627	0	integer	0 False	16.544319320163513
1628	0	integer	0 False	3.449013155987989
1629	0	integer	0 False	0.5255646223211098
1630	0	integer	0 False	2.23606797749979
1631	0	integer	0 False	1.0
1632	0	integer	0 False	2.0
1633	0	integer	0 False	1.4142135623730951
1634	0	integer	0 False	0.0
1635	0	integer	0 False	0.0
1636	0	integer	0 False	2.23606797749979
1637	0	integer	0 False	1.0
1638	0	integer	0 False	1.4142135623730951
1639	0	integer	0 False	2.23606797749979
1640	0	integer	0 False	1.4142135623730951
1641	0	integer	0 False	1.0
1642	0	integer	0 False	2.23606797749979
1643	0	integer	0 False	2.0
1644	0	integer	0 False	1.0
1645	0	integer	0 False	0.0
1646	0	integer	0 False	2.8284271247461903
1647	0	integer	0 False	1.4142135623730951
1648	0	integer	0 False	2.23606797749979
1649	0	integer	0 False	2.23606797749979
1650	0	integer	0 False	1.4142135623730951
1651	0	integer	0 False	2.23606797749979
1652	0	integer	0 False	1.4142135623730951
1653	0	integer	0 False	1.0
1654	0	integer	0 False	1.4142135623730951
1655	0	integer	0 False	2.23606797749979
1656	0	integer	0 False	1.4142135623730951
1657	0	integer	0 False	1.0
1658	0	integer	0 False	1.0
1659	0	integer	0 False	1.4142135623730951
1660	0	integer	0 False	2.0
1661	0	integer	0 False	7.211102550927978
1662	0	integer	0 False	0.0
1663	0	integer	0 False	1.0
1664	0	integer	0 False	2.0
1665	0	integer	0 False	0.0
1666	0	integer	0 False	1.0
1667	0	integer	0 False	0.0
1668	0	integer	0 False	1.0
1669	0	integer	0 False	1.4142135623730951
1670	0	integer	0 False	0.0
1671	0	integer	0 False	1.4142135623730951
1672	0	integer	0 False	2.23606797749979
1673	0	integer	0 False	2.23606797749979
1674	0	integer	0 False	4.0
1675	0	integer	0 False	0.0
1676	0	integer	0 False	1.0
1677	0	integer	0 False	2.23606797749979
1678	0	integer	0 False	3.1622776601683795
1679	0	integer	0 False	0.1964965643997976
1680	0	integer	0 False	10.62475560850654
1681	0	integer	0 False	22.438651433492378
1682	0	integer	0 False	0.0
1683	0	integer	0 False	1.0
1684	0	integer	0 False	1.4142135623730951
1685	0	integer	0 False	1.4142135623730951
1686	0	integer	0 False	1.0
1687	0	integer	0 False	4.242640687119285
1688	0	integer	0 False	3.9481224826930323
1689	0	integer	0 False	7.435240470849898
1690	0	integer	0 False	1.0
1691	0	integer	0 False	4.08033448748151
1692	0	integer	0 False	2.86726282791274
1693	0	integer	0 False	30.928030289051925
1694	0	integer	0 False	2.0
1695	0	integer	0 False	2.8284271247461903
1696	0	integer	0 False	2.23606797749979
1697	0	integer	0 False	2.0
1698	0	integer	0 False	1.0
1699	0	integer	0 False	1.0
1700	0	integer	0 False	2.0
1701	0	integer	0 False	1.4142135623730951
1702	0	integer	0 False	0.0
1703	0	integer	0 False	1.4142135623730951
1704	0	integer	0 False	1.0
1705	0	integer	0 False	1.0
1706	0	integer	0 False	1.0
1707	0	integer	0 False	1.4142135623730951
1708	0	integer	0 False	1.4142135623730951
1709	0	integer	0 False	0.0
1710	0	integer	0 False	1.0
1711	0	integer	0 False	1.0
1712	0	integer	0 False	1.0
1713	0	integer	0 False	1.0
1714	0	integer	0 False	1.0
1715	0	integer	0 False	1.0
1716	0	integer	0 False	1.0
1717	0	integer	0 False	0.0
1718	0	integer	0 False	2.23606797749979
1719	0	integer	0 False	1.0
1720	0	integer	0 False	2.23606797749979
1721	0	integer	0 False	2.0
1722	0	integer	0 False	1.0
1723	0	integer	0 False	2.23606797749979
1724	0	integer	0 False	1.0
1725	0	integer	0 False	2.0
1726	0	integer	0 False	1.0
1727	0	integer	0 False	1.0
1728	0	integer	0 False	1.4142135623730951
1729	0	integer	0 False	1.0
1730	0	integer	0 False	2.23606797749979
1731	0	integer	0 False	1.0
1732	0	integer	0 False	1.4142135623730951
1733	0	integer	0 False	1.4142135623730951
1734	0	integer	0 False	1.0
1735	0	integer	0 False	1.0
1736	0	integer	0 False	1.0
1737	0	integer	0 False	1.0
1738	0	integer	0 False	0.0
1739	0	integer	0 False	1.4142135623730951
1740	0	integer	0 False	2.23606797749979
1741	0	integer	0 False	2.23606797749979
1742	0	integer	0 False	0.0
1743	0	integer	0 False	1.4142135623730951
1744	0	integer	0 False	1.0
1745	0	integer	0 False	1.0
1746	0	integer	0 False	1.0
1747	0	integer	0 False	1.4142135623730951
1748	0	integer	0 False	2.23606797749979
1749	0	integer	0 False	1.0
1750	0	integer	0 False	2.0
1751	0	integer	0 False	0.0
1752	0	integer	0 False	1.0
1753	0	integer	0 False	2.23606797749979
1754	0	integer	0 False	1.0
1755	0	integer	0 False	1.4142135623730951
1756	0	integer	0 False	2.23606797749979
1757	0	integer	0 False	1.0
1758	0	integer	0 False	1.0
1759	0	integer	0 False	1.0
1760	0	integer	0 False	2.23606797749979
1761	0	integer	0 False	1.0
1762	0	integer	0 False	2.0
1763	0	integer	0 False	1.4142135623730951
1764	0	integer	0 False	2.0
1765	0	integer	0 False	0.0
1766	0	integer	0 False	2.0
1767	0	integer	0 False	1.4142135623730951
1768	0	integer	0 False	0.0
1769	0	integer	0 False	0.0
1770	0	integer	0 False	2.23606797749979
1771	0	integer	0 False	2.0
1772	0	integer	0 False	2.23606797749979
1773	0	integer	0 False	1.4142135623730951
1774	0	integer	0 False	1.4142135623730951
1775	0	integer	0 False	1.0
1776	0	integer	0 False	3.0
1777	0	integer	0 False	3.0
1778	0	integer	0 False	1.4142135623730951
1779	0	integer	0 False	1.0
1780	0	integer	0 False	1.0
1781	0	integer	0 False	1.0
1782	0	integer	0 False	2.23606797749979
1783	0	integer	0 False	3.605551275463989
1784	0	integer	0 False	2.23606797749979
1785	0	integer	0 False	2.23606797749979
1786	0	integer	0 False	2.0
1787	0	integer	0 False	1.4142135623730951
1788	0	integer	0 False	1.4142135623730951
1789	0	integer	0 False	1.4142135623730951
1790	0	integer	0 False	1.0
1791	0	integer	0 False	1.0
1792	0	integer	0 False	1.4142135623730951
1793	0	integer	0 False	2.0
1794	0	integer	0 False	1.0
1795	0	integer	0 False	0.0
1796	0	integer	0 False	3.0
1797	0	integer	0 False	1.0
1798	0	integer	0 False	1.4142135623730951
1799	0	integer	0 False	1.0
1800	0	integer	0 False	1.4142135623730951
1801	0	integer	0 False	1.0
1802	0	integer	0 False	2.0
1803	0	integer	0 False	0.0
1804	0	integer	0 False	1.0
1805	0	integer	0 False	1.4142135623730951
1806	0	integer	0 False	1.4142135623730951
1807	0	integer	0 False	2.23606797749979
1808	0	integer	0 False	2.0
1809	0	integer	0 False	2.23606797749979
1810	0	integer	0 False	1.4142135623730951
1811	0	integer	0 False	1.4142135623730951
1812	0	integer	0 False	1.0
1813	0	integer	0 False	1.4142135623730951
1814	0	integer	0 False	1.0
1815	0	integer	0 False	1.4142135623730951
1816	0	integer	0 False	2.0
1817	0	integer	0 False	1.0
1818	0	integer	0 False	1.4142135623730951
1819	0	integer	0 False	2.23606797749979
1820	0	integer	0 False	0.0
1821	0	integer	0 False	1.4142135623730951
1822	0	integer	0 False	1.0
1823	0	integer	0 False	0.0
1824	0	integer	0 False	2.1611668422017623
1825	0	integer	0 False	1.13946533203125
1826	0	integer	0 False	0.569732666015625
1827	0	integer	0 False	1.1766992087432817
1828	0	integer	0 False	1.4394902887037073
1829	0	integer	0 False	0.430267333984375
1830	0	integer	0 False	2.0939486688687152
1831	0	integer	0 False	1.6943072341334544
1832	0	integer	0 False	2.63857530859067
1833	0	integer	0 False	1.326529394984681
1834	0	integer	0 False	2.014391029766381
1835	0	integer	0 False	3.7801177092049802
1836	0	integer	0 False	0.9306814766502506
1837	0	integer	0 False	2.0
1838	0	integer	0 False	8.94427190999916
1839	0	integer	0 False	7.746999340230123
1840	0	integer	0 False	1.1835233109756516
1841	0	integer	0 False	1.5341591803298928
1842	0	integer	0 False	0.713950481069446
1843	0	integer	0 False	1.7318083357813567
1844	0	integer	0 False	1.3621585976125272
1845	0	integer	0 False	0.8421498314328258
1846	0	integer	0 False	3.658603799021294
1847	0	integer	0 False	6.6143646083063
1848	0	integer	0 False	3.623340054626064
1849	0	integer	0 False	1.2139436328689863
1850	0	integer	0 False	2.398069142578283
1851	0	integer	0 False	2.2409243084580175
1852	0	integer	0 False	0.35395179233402024
1853	0	integer	0 False	1.0
1854	0	integer	0 False	0.6005509606697944
1855	0	integer	0 False	1.0607266106934208
1856	0	integer	0 False	1.0
1857	0	integer	0 False	1.0
1858	0	integer	0 False	1.4142135623730951
1859	0	integer	0 False	1.0
1860	0	integer	0 False	1.0
1861	0	integer	0 False	1.0
1862	0	integer	0 False	1.0
1863	0	integer	0 False	4.123105625617661
1864	0	integer	0 False	4.242640687119285
1865	0	integer	0 False	2.8284271247461903
1866	0	integer	0 False	1.0
1867	0	integer	0 False	1.0
1868	0	integer	0 False	3.6003388852150158
1869	0	integer	0 False	1.0
1870	0	integer	0 False	2.23606797749979
1871	0	integer	0 False	2.23606797749979
1872	0	integer	0 False	1.4142135623730951
1873	0	integer	0 False	2.23606797749979
1874	0	integer	0 False	1.4142135623730951
1875	0	integer	0 False	2.23606797749979
1876	0	integer	0 False	1.4142135623730951
1877	0	integer	0 False	1.0
1878	0	integer	0 False	2.23606797749979
1879	0	integer	0 False	1.4142135623730951
1880	0	integer	0 False	2.0
1881	0	integer	0 False	1.0
1882	0	integer	0 False	0.0
1883	0	integer	0 False	0.0
1884	0	integer	0 False	0.07134079036263202
1885	0	integer	0 False	1.0
1886	0	integer	0 False	0.0
1887	0	integer	0 False	1.0
1888	0	integer	0 False	1.4142135623730951
1889	0	integer	0 False	2.23606797749979
1890	0	integer	0 False	2.23606797749979
1891	0	integer	0 False	0.0
1892	0	integer	0 False	3.1622776601683795
1893	0	integer	0 False	0.0
1894	0	integer	0 False	1.4142135623730951
1895	0	integer	0 False	2.23606797749979
1896	0	integer	0 False	2.0
1897	0	integer	0 False	1.0
1898	0	integer	0 False	2.23606797749979
1899	0	integer	0 False	11.595030665819907
1900	0	integer	0 False	12.932515414502282
1901	0	integer	0 False	6.082762530298219
1902	0	integer	0 False	1.0
1903	0	integer	0 False	7.616070863905742
1904	0	integer	0 False	15.675756246434975
1905	0	integer	0 False	37.34924474681071
1906	0	integer	0 False	1.0
1907	0	integer	0 False	2.0
1908	0	integer	0 False	2.23606797749979
1909	0	integer	0 False	1.0
1910	0	integer	0 False	0.0
1911	0	integer	0 False	1.0
1912	0	integer	0 False	1.4142135623730951
1913	0	integer	0 False	1.0
1914	0	integer	0 False	2.23606797749979
1915	0	integer	0 False	0.0
1916	0	integer	0 False	10.85426081448633
1917	0	integer	0 False	25.298221281347036
1918	0	integer	0 False	0.0
1919	0	integer	0 False	0.0
1920	0	integer	0 False	1.0
1921	0	integer	0 False	1.0
1922	0	integer	0 False	0.0
1923	0	integer	0 False	1.0
1924	0	integer	0 False	1.0
1925	0	integer	0 False	1.4142135623730951
1926	0	integer	0 False	1.4142135623730951
1927	0	integer	0 False	0.0
1928	0	integer	0 False	1.0
1929	0	integer	0 False	1.0
1930	0	integer	0 False	1.0
1931	0	integer	0 False	1.0
1932	0	integer	0 False	3.1622776601683795
1933	0	integer	0 False	3.0
1934	0	integer	0 False	1.0
1935	0	integer	0 False	1.0
1936	0	integer	0 False	1.0
1937	0	integer	0 False	2.23606797749979
1938	0	integer	0 False	1.0
1939	0	integer	0 False	19.72308292331602
1940	0	integer	0 False	27.784887978899608
1941	0	integer	0 False	33.77078215962943
1942	0	integer	0 False	2.23606797749979
1943	0	integer	0 False	15.173887739029583
1944	0	integer	0 False	10.520847803452506
1945	0	integer	0 False	40.051029143535075
1946	0	integer	0 False	3.0
1947	0	integer	0 False	2.23606797749979
1948	0	integer	0 False	1.4142135623730951
1949	0	integer	0 False	3.0
1950	0	integer	0 False	2.23606797749979
1951	0	integer	0 False	0.0
1952	0	integer	0 False	0.4246536567377073
1953	0	integer	0 False	2.191064245434689
1954	0	integer	0 False	1.1766992087432817
1955	0	integer	0 False	0.8116582547335879
1956	0	integer	0 False	2.9647012269213056
1957	0	integer	0 False	1.8702019667270506
1958	0	integer	0 False	0.5673310728989106
1959	0	integer	0 False	4.081233202687385
1960	0	integer	0 False	2.5681554274573775
1961	0	integer	0 False	1.342141215869173
1962	0	integer	0 False	2.371157996062995
1963	0	integer	0 False	18.452481661044757
1964	0	integer	0 False	16.92241515529561
1965	0	integer	0 False	30.180120138741568
1966	0	integer	0 False	0.9421161437374697
1967	0	integer	0 False	1.9078596238271048
1968	0	integer	0 False	1.850948477639967
1969	0	integer	0 False	6.1853450568923
1970	0	integer	0 False	2.23606797749979
1971	0	integer	0 False	2.3170117608852796
1972	0	integer	0 False	1.2916816866694227
1973	0	integer	0 False	0.8295129770701101
1974	0	integer	0 False	0.9949314296886674
1975	0	integer	0 False	1.4217508682363111
1976	0	integer	0 False	4.431799681067476
1977	0	integer	0 False	1.676337511321508
1978	0	integer	0 False	2.5647402251838463
1979	0	integer	0 False	6.5948805251314635
1980	0	integer	0 False	1.8921648574233516
1981	0	integer	0 False	3.8672194586743402
1982	0	integer	0 False	1.4142135623730951
1983	0	integer	0 False	1.4142135623730951
1984	0	integer	0 False	1.0
1985	0	integer	0 False	2.23606797749979
1986	0	integer	0 False	1.0
1987	0	integer	0 False	1.0
1988	0	integer	0 False	2.23606797749979
1989	0	integer	0 False	2.0
1990	0	integer	0 False	1.4142135623730951
1991	0	integer	0 False	1.0
1992	0	integer	0 False	2.23606797749979
1993	0	integer	0 False	1.0
1994	0	integer	0 False	1.4142135623730951
1995	0	integer	0 False	2.23606797749979
1996	0	integer	0 False	0.0
1997	0	integer	0 False	1.0
1998	0	integer	0 False	2.23606797749979
[truncated: 94,001 more rows]
