# Supplementary material for: DeepPoseKit, a software toolkit for fast and robust animal pose estimation using deep learning
Source: eLife. 2019 Oct 1;8:e47994. doi: 10.7554/eLife.47994 (PMC6897514; doi:10.7554/eLife.47994)
Supplement: Appendix 1—figure 2—source data 1. — See 'Materials and methods’ for details. [file elife-47994-app1-fig2-data1.csv]

	model	animal	error
0	edges	locust	0.34000396728515625
1	edges	locust	1.3496674946184886
2	edges	locust	0.10770930314231725
3	edges	locust	1.2371029936615807
4	edges	locust	1.3644172243498032
5	edges	locust	3.440274318809131
6	edges	locust	1.0155589788307824
7	edges	locust	0.6209644912812086
8	edges	locust	0.5578537602923408
9	edges	locust	0.18110763539204977
10	edges	locust	1.4118122866251388
11	edges	locust	1.6943479547860705
12	edges	locust	1.7871863893114084
13	edges	locust	0.5730613548371065
14	edges	locust	0.17204512178054363
15	edges	locust	0.18110763539204977
16	edges	locust	0.545893818493684
17	edges	locust	4.313624375715916
18	edges	locust	0.272031990428534
19	edges	locust	0.20099869674466736
20	edges	locust	0.18439221320100868
21	edges	locust	0.1264915891390895
22	edges	locust	0.6660346450774618
23	edges	locust	0.28000640869140625
24	edges	locust	0.36769854730310597
25	edges	locust	0.5261148180506174
26	edges	locust	0.22090122483486596
27	edges	locust	5.0130850923234265
28	edges	locust	2.3069401657051776
29	edges	locust	5.730638347071326
30	edges	locust	6.923912333980007
31	edges	locust	0.38052343360414925
32	edges	locust	1.0113333242705607
33	edges	locust	0.8287324128525173
34	edges	locust	0.6200027465820312
35	edges	locust	0.24083455265344594
36	edges	locust	0.9206019201604819
37	edges	locust	1.035525347094532
38	edges	locust	0.8062739323442637
39	edges	locust	1.1844425873389253
40	edges	locust	0.9782282530331697
41	edges	locust	0.16706635843925086
42	edges	locust	0.4494406381482859
43	edges	locust	0.44721700748193327
44	edges	locust	2.1577799967974265
45	edges	locust	0.365739973752704
46	edges	locust	0.46043666514855897
47	edges	locust	1.5015716361843674
48	edges	locust	0.6544815812327677
49	edges	locust	0.37925110294392494
50	edges	locust	0.6286390588282464
51	edges	locust	0.14422535199934156
52	edges	locust	1.5012658854572647
53	edges	locust	0.8890915729067668
54	edges	locust	0.5896397357309778
55	edges	locust	0.4919376846251216
56	edges	locust	0.05655904765289127
57	edges	locust	0.4049731285906643
58	edges	locust	0.26253431495074
59	edges	locust	0.4237455586961946
60	edges	locust	0.09545086157117885
61	edges	locust	0.31817198968422256
62	edges	locust	0.24413451246715875
63	edges	locust	0.4797012297485786
64	edges	locust	1.327031559294007
65	edges	locust	0.6616509264900136
66	edges	locust	0.46647636094382294
67	edges	locust	0.3304838001758638
68	edges	locust	0.9874100031240927
69	edges	locust	0.8753914725257393
70	edges	locust	0.5927748675053591
71	edges	locust	0.9603707783221037
72	edges	locust	0.41658205550017857
73	edges	locust	0.40723297976513784
74	edges	locust	0.9115580870267846
75	edges	locust	0.4666903214032148
76	edges	locust	1.4670247234017055
77	edges	locust	0.1283345944639837
78	edges	locust	0.9373102109873803
79	edges	locust	1.890292284860983
80	edges	locust	0.28420777159781674
81	edges	locust	0.8380130427143984
82	edges	locust	1.2765810397401556
83	edges	locust	1.7058384086507379
84	edges	locust	1.3903947436249504
85	edges	locust	0.32656308323858674
86	edges	locust	1.1072370162597203
87	edges	locust	1.5717925810841833
88	edges	locust	1.2992400665391786
89	edges	locust	0.896421876045025
90	edges	locust	0.7588324701377697
91	edges	locust	1.4058732384180603
92	edges	locust	1.1939939340886052
93	edges	locust	1.0615972954816884
94	edges	locust	0.7789345142538984
95	edges	locust	1.4418172266254754
96	edges	locust	0.8306484705497932
97	edges	locust	1.2475580586195907
98	edges	locust	1.5268106514521091
99	edges	locust	0.3165403062213745
100	edges	locust	0.6300839364152964
101	edges	locust	0.08145136911663994
102	edges	locust	2.4345162950263317
103	edges	locust	1.4145717194154432
104	edges	locust	1.5997962910380419
105	edges	locust	0.284542728661222
106	edges	locust	1.114779254398918
107	edges	locust	0.35102059614553943
108	edges	locust	0.8062042324143822
109	edges	locust	0.7224305633079658
110	edges	locust	0.36594234680484483
111	edges	locust	0.8045470075076531
112	edges	locust	0.49758054533879786
113	edges	locust	1.759033817040325
114	edges	locust	0.6684979076434718
115	edges	locust	1.3687260935500813
116	edges	locust	0.8511613414384792
117	edges	locust	1.7368047903546975
118	edges	locust	0.5767601827603694
119	edges	locust	0.5631571291487065
120	edges	locust	0.1268264696213155
121	edges	locust	1.310186302137207
122	edges	locust	1.4519433086988045
123	edges	locust	0.7037967215611084
124	edges	locust	0.6632210204533596
125	edges	locust	0.8105353128279684
126	edges	locust	0.5807604988735008
127	edges	locust	0.6783952988982679
128	edges	locust	0.6168534725640278
129	edges	locust	1.1945289730809812
130	edges	locust	0.40414743020611726
131	edges	locust	0.19487015994739063
132	edges	locust	1.5376518855709376
133	edges	locust	0.2832450940442504
134	edges	locust	1.9672833061014792
135	edges	locust	0.9320501712286877
136	edges	locust	0.7147965209126559
137	edges	locust	1.1744313726849789
138	edges	locust	0.15025895852248483
139	edges	locust	0.8837456196056508
140	edges	locust	0.28635951185815084
141	edges	locust	1.1545802051964984
142	edges	locust	0.37202468758788826
143	edges	locust	0.8777751803786726
144	edges	locust	0.6068044844874658
145	edges	locust	0.26061887539025014
146	edges	locust	0.5336846901800019
147	edges	locust	0.34059149065056055
148	edges	locust	0.4252047990031783
149	edges	locust	0.16842259968935303
150	edges	locust	0.6280133850235351
151	edges	locust	2.581028897212529
152	edges	locust	0.26832747492787556
153	edges	locust	0.29999847412497427
154	edges	locust	0.412311672805901
155	edges	locust	0.7403170998819243
156	edges	locust	0.3006692567933944
157	edges	locust	0.18439138566212923
158	edges	locust	0.17888953256273493
159	edges	locust	0.09999847412109375
160	edges	locust	0.3033651447326003
161	edges	locust	0.2630611793622026
162	edges	locust	0.3352626215789214
163	edges	locust	0.30463789668307856
164	edges	locust	0.3352603458718913
165	edges	locust	1.4303611002493082
166	edges	locust	0.18439221320100868
167	edges	locust	0.2505913174188093
168	edges	locust	1.0538039833467634
169	edges	locust	0.2811388502301017
170	edges	locust	0.3632876919371682
171	edges	locust	0.4669041129480278
172	edges	locust	0.26000213623046875
173	edges	locust	0.8675812089540299
174	edges	locust	0.08246492520335044
175	edges	locust	0.4526716190597629
176	edges	locust	0.49280793244656235
177	edges	locust	0.5329572339497811
178	edges	locust	0.7383270910567628
179	edges	locust	1.0764658592362228
180	edges	locust	0.5813858241359114
181	edges	locust	1.4295740131196446
182	edges	locust	0.14960127307477109
183	edges	locust	2.1873277232334347
184	edges	locust	0.9379429130906995
185	edges	locust	1.3095034701815222
186	edges	locust	0.35035363726150526
187	edges	locust	0.15612990026903964
188	edges	locust	0.40916785688779317
189	edges	locust	0.9295205257329184
190	edges	locust	0.5845776038549194
191	edges	locust	0.836809625264061
192	edges	locust	0.9334037190177128
193	edges	locust	0.10942054173846687
194	edges	locust	0.5802705726776919
195	edges	locust	0.4245981483581758
196	edges	locust	0.1857093352374603
197	edges	locust	0.2445309161529072
198	edges	locust	1.2287631972602453
199	edges	locust	0.4432896897962795
200	edges	locust	0.6289091102505491
201	edges	locust	0.8113237023705371
202	edges	locust	0.7488867509015191
203	edges	locust	0.3768792297400217
204	edges	locust	1.3303977512307141
205	edges	locust	1.1922892896660287
206	edges	locust	0.4008199522726695
207	edges	locust	1.5512513374618258
208	edges	locust	0.22837887247731997
209	edges	locust	0.3236699849275469
210	edges	locust	0.24717155573719923
211	edges	locust	0.8739777649401215
212	edges	locust	0.35257558577295994
213	edges	locust	0.5033603672328256
214	edges	locust	1.9081796483656805
215	edges	locust	1.1096751057360033
216	edges	locust	0.6435246297281805
217	edges	locust	0.7226523669310109
218	edges	locust	2.8167107595524197
219	edges	locust	1.1017032798397044
220	edges	locust	0.5560023477155867
221	edges	locust	1.03832473690082
222	edges	locust	1.0970754531392486
223	edges	locust	0.873375619179922
224	edges	locust	2.694051788049079
225	edges	locust	0.624159577300014
226	edges	locust	2.6657113736190867
227	edges	locust	1.510413984264309
228	edges	locust	0.7804515648405671
229	edges	locust	1.9252876979510078
230	edges	locust	1.9537785411753679
231	edges	locust	0.1651987715098212
232	edges	locust	0.25150393721415953
233	edges	locust	1.7475040692132862
234	edges	locust	0.18517025293064754
235	edges	locust	1.8833702973593152
236	edges	locust	0.18091386227633166
237	edges	locust	0.940622267066849
238	edges	locust	0.09741305292161524
239	edges	locust	0.3565204349380029
240	edges	locust	0.3476369754743278
241	edges	locust	0.8349066645600075
242	edges	locust	0.482714466856576
243	edges	locust	1.7378460445444042
244	edges	locust	1.1010069618237255
245	edges	locust	0.5003997059690636
246	edges	locust	1.3161815372678523
247	edges	locust	0.17887929668839572
248	edges	locust	0.8964364638649952
249	edges	locust	0.8681747845824527
250	edges	locust	0.1618622846398331
251	edges	locust	1.058799739143808
252	edges	locust	0.412311672805901
253	edges	locust	0.46861251892413314
254	edges	locust	0.18000030517578125
255	edges	locust	0.24738367296802136
256	edges	locust	0.12806601173418433
257	edges	locust	0.59093143712643
258	edges	locust	0.14422535199934156
259	edges	locust	0.3939548078465293
260	edges	locust	0.18110805662402432
261	edges	locust	0.260768798388151
262	edges	locust	0.279998779296875
263	edges	locust	0.6791159908796854
264	edges	locust	0.34175814962694745
265	edges	locust	2.245362386200754
266	edges	locust	0.4939699248600697
267	edges	locust	0.44271694232246217
268	edges	locust	0.6767567922534932
269	edges	locust	0.921951135633563
270	edges	locust	0.9037615282655291
271	edges	locust	1.739547397036653
272	edges	locust	0.30066164430404974
273	edges	locust	0.205915833785924
274	edges	locust	0.33106141449274296
275	edges	locust	1.2726173246886736
276	edges	locust	0.18110847793536836
277	edges	locust	0.2683257689217029
278	edges	locust	3.473272097308504
279	edges	locust	14.18089990889924
280	edges	locust	0.36056020598458033
281	edges	locust	1.4579092794630137
282	edges	locust	0.2561201081342064
283	edges	locust	0.7443117831386868
284	edges	locust	1.3901539339098448
285	edges	locust	1.7124458997835585
286	edges	locust	1.881775892941552
287	edges	locust	0.3969816079162684
288	edges	locust	0.5385204475965272
289	edges	locust	0.531412021490465
290	edges	locust	2.0282780366409545
291	edges	locust	0.512244982320321
292	edges	locust	0.8236485142575946
293	edges	locust	0.8073080180507546
294	edges	locust	1.712214864999482
295	edges	locust	1.4050822670892764
296	edges	locust	1.2525171384585332
297	edges	locust	0.4808315576349133
298	edges	locust	0.8089495895818777
299	edges	locust	0.839996337890625
300	edges	locust	0.6767543121157228
301	edges	locust	0.41616881717996906
302	edges	locust	0.24166455646462312
303	edges	locust	0.7613024750337785
304	edges	locust	0.5758470005796311
305	edges	locust	3.188479881555077
306	edges	locust	2.689903365320799
307	edges	locust	0.3773614126579921
308	edges	locust	0.9297270671880496
309	edges	locust	3.0591641989979794
310	edges	locust	1.0632055160115987
311	edges	locust	0.26683652941438923
312	edges	locust	0.4837389662455639
313	edges	locust	0.7076724820376887
314	edges	locust	0.6095903365549156
315	edges	locust	0.641004572082632
316	edges	locust	1.2303672750568762
317	edges	locust	0.49711209133400663
318	edges	locust	1.4113629149108118
319	edges	locust	1.0806375719025545
320	edges	locust	0.20055936846832376
321	edges	locust	1.728074589287727
322	edges	locust	1.1024545536930426
323	edges	locust	1.1434879275591119
324	edges	locust	1.1909437741080584
325	edges	locust	0.35021658190557514
326	edges	locust	0.46491416933147706
327	edges	locust	1.9279925834247638
328	edges	locust	0.4669653146128434
329	edges	locust	1.2102187116486118
330	edges	locust	1.4435410704762142
331	edges	locust	2.160309911934096
332	edges	locust	0.5139233173317721
333	edges	locust	1.7125223915435828
334	edges	locust	1.606062029274511
335	edges	locust	1.1129027046995013
336	edges	locust	0.8019652616007014
337	edges	locust	0.16999462212047894
338	edges	locust	0.7087162006647818
339	edges	locust	2.11947639530996
340	edges	locust	0.7987754597921949
341	edges	locust	1.2952430090908598
342	edges	locust	0.6463259710542368
343	edges	locust	1.0567899689684348
344	edges	locust	0.890746839435799
345	edges	locust	1.0899606270297588
346	edges	locust	1.616635381411459
347	edges	locust	0.8485679503477508
348	edges	locust	0.8005371416296486
349	edges	locust	1.8761980624133245
350	edges	locust	0.7286863670687576
351	edges	locust	0.5076646746411215
352	edges	locust	1.8418828086667116
353	edges	locust	3.6779912583445276
354	edges	locust	0.9178921950646985
355	edges	locust	0.5851104769571062
356	edges	locust	0.33821117073228235
357	edges	locust	0.7484139574910581
358	edges	locust	3.897480206844046
359	edges	locust	1.205985833098805
360	edges	locust	1.763322326435509
361	edges	locust	1.1232852058064031
362	edges	locust	3.112714472107995
363	edges	locust	3.8704284465138277
364	edges	locust	1.1786429846791402
365	edges	locust	3.1162601664406697
366	edges	locust	0.09757719955525204
367	edges	locust	10.006427526116125
368	edges	locust	8.521251129930523
369	edges	locust	9.04184583722247
370	edges	locust	0.6285554994201992
371	edges	locust	2.447178599882572
372	edges	locust	1.908273056043945
373	edges	locust	0.873663900599098
374	edges	locust	3.4989732170060868
375	edges	locust	5.78657105893021
376	edges	locust	7.363920074800785
377	edges	locust	4.760212201242217
378	edges	locust	2.9853714700093645
379	edges	locust	1.0253749497923326
380	edges	locust	1.6556849785470484
381	edges	locust	4.088691927573769
382	edges	locust	2.546823077832436
383	edges	locust	0.5575108416094507
384	edges	locust	2.2482725685195954
385	edges	locust	0.5408851345210539
386	edges	locust	0.64782590885994
387	edges	locust	0.3947459574692412
388	edges	locust	1.9104444455294045
389	edges	locust	0.40668540265848546
390	edges	locust	0.7994383038886178
391	edges	locust	0.8830088789220553
392	edges	locust	0.7464912918987174
393	edges	locust	0.6546508201471701
394	edges	locust	0.05052496746963709
395	edges	locust	0.5029101297438581
396	edges	locust	0.8360405487128478
397	edges	locust	0.3966995915216795
398	edges	locust	0.513725131778194
399	edges	locust	1.4728706385653076
400	edges	locust	1.6845345213557688
401	edges	locust	0.5441204383943365
402	edges	locust	2.4200290315912905
403	edges	locust	1.7451715595566981
404	edges	locust	0.3134778616894171
405	edges	locust	0.6766597560314181
406	edges	locust	0.7101645832468673
407	edges	locust	0.1727520912083269
408	edges	locust	0.4598875625192513
409	edges	locust	0.6503121572883606
410	edges	locust	0.21244572682453153
411	edges	locust	1.4325232112739343
412	edges	locust	2.183078429492098
413	edges	locust	0.3113219341819557
414	edges	locust	0.2111798345862965
415	edges	locust	1.2581810078214442
416	edges	locust	0.8295041820112308
417	edges	locust	0.5796573632154184
418	edges	locust	0.32520666887186395
419	edges	locust	0.3784996164661462
420	edges	locust	1.0088472937566264
421	edges	locust	0.6756852181630375
422	edges	locust	0.09431357060217306
423	edges	locust	0.02016351102816507
424	edges	locust	0.5510021270623702
425	edges	locust	0.9623025511766502
426	edges	locust	1.236116860748423
427	edges	locust	1.0254407749665753
428	edges	locust	0.6818347109373553
429	edges	locust	1.5354621012217564
430	edges	locust	1.2327406146649371
431	edges	locust	0.24035019905770857
432	edges	locust	0.5372336916829684
433	edges	locust	0.38889303601312347
434	edges	locust	0.3074229033335832
435	edges	locust	0.3330777284315311
436	edges	locust	1.183610483714218
437	edges	locust	0.6945799782157464
438	edges	locust	0.16261340790269344
439	edges	locust	0.4563824181069124
440	edges	locust	7.784115079344445
441	edges	locust	0.8151676821895242
442	edges	locust	0.8309218116009434
443	edges	locust	0.7247614031483149
444	edges	locust	0.7059007678328291
445	edges	locust	3.008897738052609
446	edges	locust	0.571000881112098
447	edges	locust	0.43411192391163356
448	edges	locust	0.3415078555910529
449	edges	locust	1.0841920611394062
450	edges	locust	0.7662622348278999
451	edges	locust	0.5608835886022019
452	edges	locust	0.8229668115049906
453	edges	locust	1.486088889388301
454	edges	locust	1.098208964589666
455	edges	locust	0.6529174891852683
456	edges	locust	0.26545102340210414
457	edges	locust	0.3947621903175644
458	edges	locust	1.0447988323016018
459	edges	locust	0.5233391990962978
460	edges	locust	3.6190287605427467
461	edges	locust	0.9221890478331574
462	edges	locust	0.3169349431751152
463	edges	locust	0.23466305301469143
464	edges	locust	0.7985897740092469
465	edges	locust	2.0659116156538326
466	edges	locust	0.9009375274803324
467	edges	locust	0.1353619888131238
468	edges	locust	0.3682921420676352
469	edges	locust	1.1714789151613152
470	edges	locust	1.092436698671449
471	edges	locust	1.2612876031468812
472	edges	locust	1.7136588962086003
473	edges	locust	1.8635214153307644
474	edges	locust	0.3212442491008635
475	edges	locust	1.8081957458394082
476	edges	locust	0.35056533529397843
477	edges	locust	0.8857738346162464
478	edges	locust	0.4861017522001552
479	edges	locust	0.3954019319276552
480	edges	locust	0.5737364201574787
481	edges	locust	0.10456179158074592
482	edges	locust	2.0170100748648867
483	edges	locust	1.180576563726782
484	edges	locust	0.5253078489643765
485	edges	locust	0.551145083661614
486	edges	locust	1.2343713143297494
487	edges	locust	0.6166987103874814
488	edges	locust	0.272354360715031
489	edges	locust	0.21937304119948636
490	edges	locust	0.9538143375371425
491	edges	locust	0.46583513313993397
492	edges	locust	1.9317221366990736
493	edges	locust	0.547694141972745
494	edges	locust	1.730114533970226
495	edges	locust	4.015607334275876
496	edges	locust	0.7675930521167414
497	edges	locust	1.8754849674343028
498	edges	locust	0.5439525655098694
499	edges	locust	2.786198092069881
500	edges	locust	2.0809443833108383
501	edges	locust	2.248191404741018
502	edges	locust	1.6049017567817478
503	edges	locust	1.1944592432528771
504	edges	locust	2.2651090178135
505	edges	locust	4.9323467860965655
506	edges	locust	0.46145119152323594
507	edges	locust	0.9355210106628502
508	edges	locust	1.2704485439825974
509	edges	locust	1.7386901647370623
510	edges	locust	1.5071226668991589
511	edges	locust	1.0351079838847796
512	edges	locust	0.9747319400855415
513	edges	locust	0.628471183756189
514	edges	locust	0.6097499272771787
515	edges	locust	1.157873465897432
516	edges	locust	1.1650747422572212
517	edges	locust	2.6437378947387082
518	edges	locust	0.5556478416629865
519	edges	locust	1.9436437470366932
520	edges	locust	0.5090075143005391
521	edges	locust	0.48517559103887475
522	edges	locust	0.810122850708966
523	edges	locust	1.1115954570072348
524	edges	locust	0.3204186020187807
525	edges	locust	0.40210646093747915
526	edges	locust	0.7940554654371226
527	edges	locust	0.23342347166143393
528	edges	locust	1.3149147291705152
529	edges	locust	0.5877562772969349
530	edges	locust	1.2743600738658678
531	edges	locust	0.577965237838328
532	edges	locust	0.5172847397832963
533	edges	locust	1.113174070421836
534	edges	locust	0.9039780013936269
535	edges	locust	0.6289122964733554
536	edges	locust	0.989184137666941
537	edges	locust	0.629560391604001
538	edges	locust	1.156946164294134
539	edges	locust	0.7416815113385967
540	edges	locust	2.298825945064501
541	edges	locust	0.3696588846385888
542	edges	locust	3.3332202843320484
543	edges	locust	1.3447057732791852
544	edges	locust	0.8371977385546503
545	edges	locust	0.44216269894225163
546	edges	locust	0.5998456836369647
547	edges	locust	0.4078665473919681
548	edges	locust	0.39967512324111837
549	edges	locust	1.9906031672793285
550	edges	locust	1.0011568975053764
551	edges	locust	0.5521569885485692
552	edges	locust	1.0304869750453738
553	edges	locust	0.2756254871160696
554	edges	locust	0.8646945815388389
555	edges	locust	0.27769913570570576
556	edges	locust	0.18876963488180967
557	edges	locust	0.7007850057972947
558	edges	locust	1.4580322372122503
559	edges	locust	0.8217014093130747
560	edges	locust	0.7979545886676391
561	edges	locust	0.4267495419223112
562	edges	locust	0.6771744234473941
563	edges	locust	0.8008760180804544
564	edges	locust	0.38710525816645963
565	edges	locust	0.2832106183730856
566	edges	locust	0.6973440052029124
567	edges	locust	0.04735076906478149
568	edges	locust	1.093706768478785
569	edges	locust	0.28819963065505333
570	edges	locust	1.5870701127202416
571	edges	locust	0.9468040309139958
572	edges	locust	0.9249191878799443
573	edges	locust	0.2228473746357445
574	edges	locust	0.9454518260439273
575	edges	locust	0.264300685891973
576	edges	locust	0.3854047992357723
577	edges	locust	1.1614189067774447
578	edges	locust	0.284518883424717
579	edges	locust	0.1630855448051157
580	edges	locust	0.5614521108871062
581	edges	locust	0.4776850336513308
582	edges	locust	0.40173786109673715
583	edges	locust	1.0439281891305594
584	edges	locust	3.936826167768199
585	edges	locust	4.8718563259305565
586	edges	locust	3.830667412670885
587	edges	locust	1.48110901616682
588	edges	locust	1.310730656815204
589	edges	locust	1.2988599634603728
590	edges	locust	0.5708278790822989
591	edges	locust	0.5955343160155183
592	edges	locust	0.44272121329568337
593	edges	locust	0.7556379676962092
594	edges	locust	1.1426289138437336
595	edges	locust	0.5125658081628581
596	edges	locust	0.8725699833250601
597	edges	locust	0.39350431383760537
598	edges	locust	0.4311344803627644
599	edges	locust	0.24113884725634666
600	edges	locust	0.3410993430477892
601	edges	locust	1.1814963346248706
602	edges	locust	0.2594580147033243
603	edges	locust	0.2073789157259267
604	edges	locust	0.5137793884001336
605	edges	locust	0.8804026469151128
606	edges	locust	0.868180360025304
607	edges	locust	0.355769520544178
608	edges	locust	0.4512177050054918
609	edges	locust	0.5084332503902927
610	edges	locust	0.6464390232478742
611	edges	locust	1.1992754588948702
612	edges	locust	1.2558001052919976
613	edges	locust	0.04811030434413753
614	edges	locust	0.3863614281077782
615	edges	locust	0.3623902556842578
616	edges	locust	1.1247259066891042
617	edges	locust	0.4090127293121313
618	edges	locust	0.5173972353823247
619	edges	locust	0.5411150745209963
620	edges	locust	0.5701837243490483
621	edges	locust	0.5267256521502716
622	edges	locust	0.6874047160920994
623	edges	locust	0.8836452704098637
624	edges	locust	0.27990362431444976
625	edges	locust	1.0983367095958854
626	edges	locust	0.5512529391704304
627	edges	locust	0.3502771576471649
628	edges	locust	1.423335331610758
629	edges	locust	0.5134222749914126
630	edges	locust	0.3529312287638632
631	edges	locust	0.8996835103573756
632	edges	locust	0.805404966482165
633	edges	locust	0.6925783469010494
634	edges	locust	1.5916725526422904
635	edges	locust	1.245274520690162
636	edges	locust	0.5534719337188829
637	edges	locust	0.6322200085664628
638	edges	locust	0.8692567851960014
639	edges	locust	0.7388953425138822
640	edges	locust	0.045568174144475754
641	edges	locust	0.39203533769955073
642	edges	locust	0.7314934428791049
643	edges	locust	0.49438048398169687
644	edges	locust	0.749597875509395
645	edges	locust	0.34455974405747314
646	edges	locust	0.555764000512502
647	edges	locust	1.6077965690143643
648	edges	locust	2.1286192141682045
649	edges	locust	1.2974453886472255
650	edges	locust	0.4107524646545845
651	edges	locust	0.8074685431253937
652	edges	locust	0.8646579301341677
653	edges	locust	0.0900790481189403
654	edges	locust	0.45770633831993374
655	edges	locust	1.6518427201018997
656	edges	locust	0.6948757602960989
657	edges	locust	1.242147301314301
658	edges	locust	0.6824531746630211
659	edges	locust	1.3717064958947012
660	edges	locust	0.4529614431199066
661	edges	locust	0.8160080430639242
662	edges	locust	1.1608249016483039
663	edges	locust	0.3432830283758438
664	edges	locust	0.9089536970314712
665	edges	locust	0.8995068628567467
666	edges	locust	0.8075207820589099
667	edges	locust	0.3275516581418683
668	edges	locust	0.6569839641690092
669	edges	locust	0.22648023514666002
670	edges	locust	2.40995504592085
671	edges	locust	1.80729771540123
672	edges	locust	0.4528274674055991
673	edges	locust	2.043036836844517
674	edges	locust	0.6259287244185531
675	edges	locust	1.2772678948374399
676	edges	locust	3.6947312314604255
677	edges	locust	0.7924755629869277
678	edges	locust	1.1922574357172722
679	edges	locust	0.13013699707173396
680	edges	locust	0.8283307968781962
681	edges	locust	1.2830923386596058
682	edges	locust	1.0460231363594295
683	edges	locust	1.0399614720452128
684	edges	locust	0.8314446048495406
685	edges	locust	0.474625772976925
686	edges	locust	0.9479034007159244
687	edges	locust	0.6385164214104327
688	edges	locust	0.9912324648533429
689	edges	locust	0.5637688590025837
690	edges	locust	2.06282496633321
691	edges	locust	0.7928439334460258
692	edges	locust	1.3042014150667967
693	edges	locust	0.3814445015390001
694	edges	locust	0.6797694672504726
695	edges	locust	0.7712722949331533
696	edges	locust	0.650722893722214
697	edges	locust	0.37696489166796987
698	edges	locust	0.443162055699421
699	edges	locust	0.5811343445691699
700	edges	locust	1.2727943640544293
701	edges	locust	0.10770221942733003
702	edges	locust	0.26832747492787556
703	edges	locust	0.44407037566471674
704	edges	locust	0.4604323569793736
705	edges	locust	0.5993347141746227
706	edges	locust	2.0510543984771967
707	edges	locust	0.8658102793841518
708	edges	locust	0.9867126447394063
709	edges	locust	1.1497872449386302
710	edges	locust	2.072005516491097
711	edges	locust	1.909604292420517
712	edges	locust	1.375350421451088
713	edges	locust	0.100006103515625
714	edges	locust	3.0886865227901366
715	edges	locust	5.723008973772324
716	edges	locust	1.066768711301537
717	edges	locust	0.8490000616889298
718	edges	locust	0.5813790389400323
719	edges	locust	0.21540798069817674
720	edges	locust	0.906225669802463
721	edges	locust	0.6708272171878565
722	edges	locust	0.34409645190621635
723	edges	locust	1.3296649619988004
724	edges	locust	0.9374415932345344
725	edges	locust	0.3147417760028216
726	edges	locust	0.16279064305096744
727	edges	locust	0.5922860653552652
728	edges	locust	1.7323165127074338
729	edges	locust	0.8276466225914861
730	edges	locust	0.6463604252529467
731	edges	locust	0.4005014252435873
732	edges	locust	0.509901652112
733	edges	locust	1.1999954223720124
734	edges	locust	0.6356124879761234
735	edges	locust	0.5788892333174388
736	edges	locust	1.3324832705207617
737	edges	locust	0.862983877839437
738	edges	locust	0.6545180294429188
739	edges	locust	0.26242547403598104
740	edges	locust	1.1930349618692893
741	edges	locust	0.3598068605336348
742	edges	locust	0.5903018115295041
743	edges	locust	1.0047255257304883
744	edges	locust	5.416219447790727
745	edges	locust	1.1240948281642236
746	edges	locust	5.620266176581137
747	edges	locust	0.8962994464019393
748	edges	locust	2.1709702731597917
749	edges	locust	3.5994492523235615
750	edges	locust	4.436513424846992
751	edges	locust	0.8189707115993745
752	edges	locust	1.8749108321289623
753	edges	locust	0.9456419787541502
754	edges	locust	0.9647494007198476
755	edges	locust	1.2434099758036674
756	edges	locust	0.8356826716977133
757	edges	locust	0.6768888895921943
758	edges	locust	0.9636922838801973
759	edges	locust	0.6316154106234755
760	edges	locust	1.2432085217655406
761	edges	locust	0.21550447157959152
762	edges	locust	0.8553822465432475
763	edges	locust	0.6667382121991712
764	edges	locust	0.7148770196175056
765	edges	locust	0.7327556583280944
766	edges	locust	2.022178231702114
767	edges	locust	1.1073865712952737
768	edges	locust	1.0244904026176935
769	edges	locust	1.4024323988538392
770	edges	locust	0.08427164928985749
771	edges	locust	0.5268473781607448
772	edges	locust	0.3686243369464324
773	edges	locust	0.5008298937743928
774	edges	locust	0.17825678701048256
775	edges	locust	0.6282703449469342
776	edges	locust	0.13291147260935524
777	edges	locust	0.40105542128911864
778	edges	locust	0.7688262005544498
779	edges	locust	0.359750016130086
780	edges	locust	0.2037341210453172
781	edges	locust	0.3986753483782373
782	edges	locust	0.48228551789620666
783	edges	locust	0.7809683560506264
784	edges	locust	0.42212575292055843
785	edges	locust	0.5589426579835229
786	edges	locust	0.8248946227791378
787	edges	locust	0.4522670977070507
788	edges	locust	0.45072809942492514
789	edges	locust	0.26879707238115946
790	edges	locust	0.5039857726316757
791	edges	locust	0.4659205485353884
792	edges	locust	0.4361518038633414
793	edges	locust	1.1785771791081503
794	edges	locust	0.3169825599395899
795	edges	locust	0.46677091997217274
796	edges	locust	0.32367975012045924
797	edges	locust	0.5807891683712433
798	edges	locust	1.328389914317151
799	edges	locust	1.196831430410328
800	edges	locust	1.4323963206729569
801	edges	locust	0.25600697972651676
802	edges	locust	0.820578184709687
803	edges	locust	0.57057450825679
804	edges	locust	0.6991399103360607
805	edges	locust	1.2341705311767524
806	edges	locust	0.8196231451419491
807	edges	locust	1.1607298357605957
808	edges	locust	0.16789543142028862
809	edges	locust	1.7568759117209163
810	edges	locust	2.187380683116863
811	edges	locust	0.4623225216677321
812	edges	locust	1.2241864488548926
813	edges	locust	0.35766986783782256
814	edges	locust	1.361887962722608
815	edges	locust	3.080350121892346
816	edges	locust	0.6304023420627441
817	edges	locust	1.2213737732471726
818	edges	locust	1.3828152727448635
819	edges	locust	0.8689322979889348
820	edges	locust	1.4174705062490824
821	edges	locust	2.5637028004417366
822	edges	locust	3.251729040010343
823	edges	locust	1.0597934352039413
824	edges	locust	1.1565686231097256
825	edges	locust	1.3971073031339152
826	edges	locust	0.7417555877454937
827	edges	locust	0.6987668422873525
828	edges	locust	1.0794442474243167
829	edges	locust	0.7672725571350832
830	edges	locust	0.686073143311438
831	edges	locust	1.7136624224906525
832	edges	locust	0.9007881242362882
833	edges	locust	0.89226818967314
834	edges	locust	1.4193992901711248
835	edges	locust	1.3113940540832325
836	edges	locust	1.3655329973673147
837	edges	locust	1.341726136868494
838	edges	locust	0.9976501433669429
839	edges	locust	0.9491864058140572
840	edges	locust	0.4866695758654627
841	edges	locust	0.9376761363301136
842	edges	locust	0.177650789631299
843	edges	locust	0.1719489761041372
844	edges	locust	0.8434305213723183
845	edges	locust	0.6987601362240232
846	edges	locust	0.9741176109709309
847	edges	locust	0.7232317483936024
848	edges	locust	1.30007195413088
849	edges	locust	1.7474292720498743
850	edges	locust	2.021784864231916
851	edges	locust	1.1055932313122894
852	edges	locust	0.44720868245220297
853	edges	locust	0.8440185526833844
854	edges	locust	0.6492984843192285
855	edges	locust	0.8988530065493799
856	edges	locust	0.602981088500388
857	edges	locust	0.7544566086774579
858	edges	locust	0.7356094591210361
859	edges	locust	0.8296712500991605
860	edges	locust	1.6738151115201083
861	edges	locust	0.8537358047264209
862	edges	locust	0.721127002632724
863	edges	locust	1.1897799985448845
864	edges	locust	0.7152794670684111
865	edges	locust	1.5348990751383913
866	edges	locust	1.8185727748236324
867	edges	locust	1.9379710542258952
868	edges	locust	0.6317995668355754
869	edges	locust	2.52212069541767
870	edges	locust	1.7162707009440266
871	edges	locust	1.1546127157015933
872	edges	locust	1.743846802322577
873	edges	locust	1.050896084634677
874	edges	locust	1.4459393530450035
875	edges	locust	0.2973253574562845
876	edges	locust	0.10197823571955102
877	edges	locust	0.16124553350104862
878	edges	locust	0.21540302209419107
879	edges	locust	0.2999992370605469
880	edges	locust	2.141232516189316
881	edges	locust	0.5000030517601408
882	edges	locust	0.6957049454392653
883	edges	locust	0.5004000109079649
884	edges	locust	0.6365489708678427
885	edges	locust	0.48000335693359375
886	edges	locust	0.6933995498956639
887	edges	locust	0.704552691191266
888	edges	locust	0.75073115402983
889	edges	locust	0.25060166858601785
890	edges	locust	0.11313697712607095
891	edges	locust	0.6846902277754944
892	edges	locust	6.427810046011919
893	edges	locust	1.1880093878193199
894	edges	locust	1.9653783058411156
895	edges	locust	0.8836263118509269
896	edges	locust	0.18973617710016413
897	edges	locust	0.3026580649958405
898	edges	locust	0.10000457768328275
899	edges	locust	0.5730613548371065
900	edges	locust	0.3224976911493629
901	edges	locust	0.2973268970927553
902	edges	locust	0.46518516874853555
903	edges	locust	0.5295319992258976
904	edges	locust	0.8411951917471002
905	edges	locust	0.31112871005699594
906	edges	locust	0.36221611324804864
907	edges	locust	0.17204512178054363
908	edges	locust	4.166389348733746
909	edges	locust	13.351572068994885
910	edges	locust	0.6772035468100361
911	edges	locust	1.2338816985310277
912	edges	locust	1.1595378998600248
913	edges	locust	0.6896983544912206
914	edges	locust	1.9144614351240423
915	edges	locust	0.8140069108158071
916	edges	locust	0.48194261500569296
917	edges	locust	0.4187049344898202
918	edges	locust	2.686620356346662
919	edges	locust	1.4761378876811067
920	edges	locust	0.396867408929822
921	edges	locust	1.2349440782353716
922	edges	locust	1.425186344848613
923	edges	locust	1.2766637791989017
924	edges	locust	0.35372695468030735
925	edges	locust	1.090267339219073
926	edges	locust	3.502688165940118
927	edges	locust	1.4910528852480185
928	edges	locust	7.636980780780098
929	edges	locust	4.87577835011357
930	edges	locust	0.925119531558997
931	edges	locust	0.4037745289065189
932	edges	locust	0.9372500229874235
933	edges	locust	2.4603765691050765
934	edges	locust	0.3440218910015266
935	edges	locust	0.9631169155371575
936	edges	locust	0.3454875442018482
937	edges	locust	1.6969407148971507
938	edges	locust	1.3362157554639331
939	edges	locust	1.6366539497641877
940	edges	locust	1.4509028035320508
941	edges	locust	0.6478504075416062
942	edges	locust	1.0878172120919438
943	edges	locust	6.632070549549408
944	edges	locust	7.27498085252597
945	edges	locust	0.8740863784857145
946	edges	locust	1.0760148771213491
947	edges	locust	0.36051250825240977
948	edges	locust	0.9584907319823373
949	edges	locust	1.1487938940076108
950	edges	locust	2.3293948373974893
951	edges	locust	0.8271788909724513
952	edges	locust	0.9901610731680489
953	edges	locust	1.2436660142362124
954	edges	locust	2.6551238747649766
955	edges	locust	1.169810637710758
956	edges	locust	0.6842547126077317
957	edges	locust	1.3554060042454468
958	edges	locust	0.3564084142906814
959	edges	locust	0.6600930913305266
960	edges	locust	0.5734052575096437
961	edges	locust	0.7924134242116322
962	edges	locust	1.4257195643283866
963	edges	locust	0.483009805185412
964	edges	locust	1.9716664685196936
965	edges	locust	1.0433774185354239
966	edges	locust	0.9050766044782153
967	edges	locust	0.6929723395080009
968	edges	locust	0.4492384141906263
969	edges	locust	2.4332705765196234
970	edges	locust	1.1500139936574445
971	edges	locust	0.4958699544144851
972	edges	locust	0.6799411303081564
973	edges	locust	3.4630996515789243
974	edges	locust	1.128304592198836
975	edges	locust	3.3335581466451787
976	edges	locust	0.24730667267535977
977	edges	locust	0.488588120501677
978	edges	locust	0.9752498403028452
979	edges	locust	0.41284035377819966
980	edges	locust	0.43173852821350367
981	edges	locust	1.1718950204997634
982	edges	locust	0.25613083173263873
983	edges	locust	1.0560273087309655
984	edges	locust	0.6985689194046015
985	edges	locust	1.0167919049867362
986	edges	locust	0.5727088993670956
987	edges	locust	0.23409316395424892
988	edges	locust	0.26832406295891603
989	edges	locust	0.5075306564596522
990	edges	locust	0.19385851865733617
991	edges	locust	2.6680442235543196
992	edges	locust	1.021759687452949
993	edges	locust	0.0632445883368837
994	edges	locust	1.5279074386633238
995	edges	locust	0.6893039077121212
996	edges	locust	0.617419566760074
997	edges	locust	0.29529469399570646
998	edges	locust	1.2304477676852457
999	edges	locust	0.7402651090488352
1000	edges	locust	18.224892291538605
1001	edges	locust	0.25613083173263873
1002	edges	locust	0.16124837246414706
1003	edges	locust	0.8157626520788827
1004	edges	locust	0.42189872618964014
1005	edges	locust	0.2413544957958822
1006	edges	locust	1.6910642609772877
1007	edges	locust	1.9316431002813854
1008	edges	locust	0.6938584886687281
1009	edges	locust	0.1738433810933075
1010	edges	locust	0.8576850780527874
1011	edges	locust	0.6082820226527741
1012	edges	locust	0.2332414515670979
1013	edges	locust	2.5826804342804146
1014	edges	locust	2.1011095241459254
1015	edges	locust	1.010581016686164
1016	edges	locust	0.6046040305185639
1017	edges	locust	5.944240660365066
1018	edges	locust	43.11361457428887
1019	edges	locust	63.17871051569424
1020	edges	locust	0.7023051740068292
1021	edges	locust	2.2225728798124953
1022	edges	locust	2.1837265632813416
1023	edges	locust	7.013121675709995
1024	edges	locust	17.462679528977247
1025	edges	locust	24.144466353547095
1026	edges	locust	27.795303217660216
1027	edges	locust	9.79676115766628
1028	edges	locust	14.209418244338245
1029	edges	locust	17.459330813048968
1030	edges	locust	21.613980152066212
1031	edges	locust	17.036006296042757
1032	edges	locust	45.18047690971096
1033	edges	locust	36.51686055545429
1034	edges	locust	44.702614269066814
1035	edges	locust	0.6264797200064258
1036	edges	locust	2.3802913626485878
1037	edges	locust	0.957630912001607
1038	edges	locust	1.0819816701196179
1039	edges	locust	1.500273082527827
1040	edges	locust	1.9550401289001438
1041	edges	locust	1.1689936464355501
1042	edges	locust	6.272560607648348
1043	edges	locust	13.80527858528251
1044	edges	locust	13.474159940076058
1045	edges	locust	17.695147938569566
1046	edges	locust	13.375486337782508
1047	edges	locust	30.15049285975239
1048	edges	locust	26.01976933451741
1049	edges	locust	32.58297714453853
1050	edges	locust	0.30594368452578197
1051	edges	locust	1.1501403331590645
1052	edges	locust	0.11313427982423588
1053	edges	locust	0.8694674472657058
1054	edges	locust	1.0658424416986358
1055	edges	locust	0.8799514659361407
1056	edges	locust	1.0001983840122528
1057	edges	locust	0.4019890427210406
1058	edges	locust	0.34985334542104624
1059	edges	locust	0.4024929183437541
1060	edges	locust	0.24738552342335526
1061	edges	locust	0.28071192019874286
1062	edges	locust	0.279998779296875
1063	edges	locust	0.20591212856439864
1064	edges	locust	0.1612445872140319
1065	edges	locust	0.28844752998646184
1066	edges	locust	0.12165866226423269
1067	edges	locust	2.839187673845566
1068	edges	locust	0.2912063448219662
1069	edges	locust	0.10000228881835938
1070	edges	locust	1.1929429455561764
1071	edges	locust	0.1999969482421875
1072	edges	locust	0.260768798388151
1073	edges	locust	0.14142135630316396
1074	edges	locust	1.5122681400711364
1075	edges	locust	0.7668086119181
1076	edges	locust	2.411993772845398
1077	edges	locust	0.37202468758788826
1078	edges	locust	0.9712610574184376
1079	edges	locust	0.7244313839924633
1080	edges	locust	0.345249499371464
1081	edges	locust	0.6365542444750034
1082	edges	locust	0.5283940466735874
1083	edges	locust	0.7378293259873133
1084	edges	locust	0.2720308685894481
1085	edges	locust	1.3086129842183671
1086	edges	locust	0.5532629783756952
1087	edges	locust	0.6003288331015812
1088	edges	locust	2.1623587736569436
1089	edges	locust	0.7324596650348332
1090	edges	locust	0.8310847985927698
1091	edges	locust	0.3825561540353152
1092	edges	locust	1.008973567225546
1093	edges	locust	1.782108736862116
1094	edges	locust	1.2574017088055507
1095	edges	locust	1.1282568751979256
1096	edges	locust	1.022740195990602
1097	edges	locust	1.586681004885368
1098	edges	locust	0.6448186754948879
1099	edges	locust	1.0498146414077338
1100	edges	locust	0.7441476886098717
1101	edges	locust	1.583702874304167
1102	edges	locust	1.615213686339671
1103	edges	locust	1.3336612961631358
1104	edges	locust	0.632866414617928
1105	edges	locust	1.5376836760007588
1106	edges	locust	0.6151837735645432
1107	edges	locust	0.6178304116008941
1108	edges	locust	1.266680368543806
1109	edges	locust	4.107447271298349
1110	edges	locust	4.520848054063579
1111	edges	locust	3.6959802487204354
1112	edges	locust	2.1997637864718516
1113	edges	locust	3.7674559039437963
1114	edges	locust	1.4839480699790668
1115	edges	locust	1.414541941924296
1116	edges	locust	2.018798812031615
1117	edges	locust	2.3105468566134726
1118	edges	locust	2.0079930957594807
1119	edges	locust	0.5978314734975526
1120	edges	locust	0.16396239466432144
1121	edges	locust	0.2011732836574803
1122	edges	locust	0.512039688462881
1123	edges	locust	0.9145445331297358
1124	edges	locust	0.4852263788362466
1125	edges	locust	0.34074561549078936
1126	edges	locust	0.09753895229309961
1127	edges	locust	0.2968393148608055
1128	edges	locust	0.5879628135341105
1129	edges	locust	0.56046987479241
1130	edges	locust	0.4826545999283672
1131	edges	locust	0.1138688758452324
1132	edges	locust	0.5855343231171203
1133	edges	locust	1.1499895103113311
1134	edges	locust	1.1726061567161452
1135	edges	locust	0.8647701039301793
1136	edges	locust	0.32604936681570906
1137	edges	locust	0.6340141597422075
1138	edges	locust	0.7940934984502029
1139	edges	locust	1.2374760307428423
1140	edges	locust	0.8910486653204882
1141	edges	locust	0.17274121441032717
1142	edges	locust	0.2227037166606954
1143	edges	locust	0.9583812289414743
1144	edges	locust	1.9195542260322243
1145	edges	locust	1.314332982563885
1146	edges	locust	1.1686718809402745
1147	edges	locust	0.646051227607776
1148	edges	locust	0.4658388065601492
1149	edges	locust	1.4775716472847658
1150	edges	locust	0.4528840542434268
1151	edges	locust	0.2403066476033362
1152	edges	locust	0.16147720209668878
1153	edges	locust	0.2531090329302155
1154	edges	locust	0.21648485435122602
1155	edges	locust	0.20443071349094433
1156	edges	locust	0.5956441678784287
1157	edges	locust	0.5613717949853732
1158	edges	locust	1.3008442369836966
1159	edges	locust	1.0233728610482111
1160	edges	locust	0.36673351782466146
1161	edges	locust	0.2661627718071231
1162	edges	locust	0.47084743896855114
1163	edges	locust	1.7866255048893578
1164	edges	locust	0.3555376101911185
1165	edges	locust	1.1404271168204938
1166	edges	locust	0.777499614843522
1167	edges	locust	1.0781764893073749
1168	edges	locust	1.1911685286744575
1169	edges	locust	0.6255617467420538
1170	edges	locust	0.8678752783784801
1171	edges	locust	0.28918884648413107
1172	edges	locust	0.9205887822570835
1173	edges	locust	0.8512152965693498
1174	edges	locust	1.0593810241139836
1175	edges	locust	0.5368580261262306
1176	edges	locust	0.3093571416915264
1177	edges	locust	0.5954651681829737
1178	edges	locust	1.066477643109295
1179	edges	locust	0.8927690086983581
1180	edges	locust	0.21365573834382093
1181	edges	locust	0.631800365567339
1182	edges	locust	1.051830736428445
1183	edges	locust	1.0047073509952167
1184	edges	locust	1.3178003466533255
1185	edges	locust	0.7162196443833198
1186	edges	locust	1.3947132581732928
1187	edges	locust	1.226228493754002
1188	edges	locust	0.44669127841843537
1189	edges	locust	0.7407978223342487
1190	edges	locust	0.6780698136975155
1191	edges	locust	2.6964076677826196
1192	edges	locust	1.4695639022398725
1193	edges	locust	1.7433629354972227
1194	edges	locust	4.564792417335686
1195	edges	locust	2.5249148567422877
1196	edges	locust	0.684096738476191
1197	edges	locust	0.850626680015626
1198	edges	locust	2.2483605024382127
1199	edges	locust	1.0067182876492378
1200	edges	locust	1.3009071248763553
1201	edges	locust	1.8202946655918872
1202	edges	locust	1.1399868714627892
1203	edges	locust	2.6645125903534708
1204	edges	locust	0.8752176047924739
1205	edges	locust	2.2716998294531145
1206	edges	locust	2.6473699059617384
1207	edges	locust	2.1825826712871197
1208	edges	locust	1.6267731583122331
1209	edges	locust	0.6189733294848074
1210	edges	locust	11.063806430757216
1211	edges	locust	1.222734957797807
1212	edges	locust	0.6239198787177137
1213	edges	locust	3.3709356351244084
1214	edges	locust	0.9996924842704564
1215	edges	locust	2.5711147595648725
1216	edges	locust	6.074927817809449
1217	edges	locust	4.028952900728942
1218	edges	locust	0.9520909386138461
1219	edges	locust	0.7155283946089743
1220	edges	locust	0.4254882170155463
1221	edges	locust	2.6667683417269825
1222	edges	locust	2.9475358064783905
1223	edges	locust	1.5417361602830986
1224	edges	locust	1.2676841233011693
1225	edges	locust	0.3659578859787332
1226	edges	locust	0.4549366852196552
1227	edges	locust	0.6558425665255895
1228	edges	locust	1.078561615345136
1229	edges	locust	0.5249293797085518
1230	edges	locust	1.398985691476713
1231	edges	locust	1.0183307997863373
1232	edges	locust	1.1012317013348873
1233	edges	locust	1.6282433598092303
1234	edges	locust	1.0737136579117772
1235	edges	locust	0.8340260070731197
1236	edges	locust	0.8447692290346855
1237	edges	locust	0.17039979198895683
1238	edges	locust	0.31102764490990104
1239	edges	locust	1.063148409284281
1240	edges	locust	1.4274962482468418
1241	edges	locust	1.0638517825433087
1242	edges	locust	2.299489638517178
1243	edges	locust	1.5065187501646378
1244	edges	locust	0.7162859628876338
1245	edges	locust	1.4087189533406532
1246	edges	locust	0.6421500459865479
1247	edges	locust	0.3076781755757347
1248	edges	locust	0.4808446269156886
1249	edges	locust	0.8300166351970067
1250	edges	locust	1.2492188235279211
1251	edges	locust	1.030194831265861
1252	edges	locust	1.1513931920444653
1253	edges	locust	1.2570400159512571
1254	edges	locust	1.4002526827728266
1255	edges	locust	1.0403154662863434
1256	edges	locust	1.3532793780478132
1257	edges	locust	1.1009907661031157
1258	edges	locust	1.0460035069210278
1259	edges	locust	0.7263615082577128
1260	edges	locust	0.25060166858601785
1261	edges	locust	0.9386174364261544
1262	edges	locust	0.3560909562529094
1263	edges	locust	0.9988819785487755
1264	edges	locust	1.0321681281661361
1265	edges	locust	0.7004850703134493
1266	edges	locust	1.526991503162528
1267	edges	locust	0.1516561783918434
1268	edges	locust	1.446327778709545
1269	edges	locust	2.178093648090375
1270	edges	locust	1.8002961585018995
1271	edges	locust	1.5481528344136686
1272	edges	locust	1.04089943982358
1273	edges	locust	1.4441671341905629
1274	edges	locust	1.6764504610031286
1275	edges	locust	0.17888953256273493
1276	edges	locust	0.610570481998536
1277	edges	locust	0.6403109939322854
1278	edges	locust	0.34928183856470235
1279	edges	locust	0.24082980074047086
1280	edges	locust	3.9438988980054894
1281	edges	locust	0.5336696276972025
1282	edges	locust	0.6056944945266973
1283	edges	locust	1.407722907557123
1284	edges	locust	0.4639038686930704
1285	edges	locust	0.33768040852831754
1286	edges	locust	0.7088012375450143
1287	edges	locust	0.8664864776322548
1288	edges	locust	0.18439221320100868
1289	edges	locust	0.8896817475056867
1290	edges	locust	1.014615623081573
1291	edges	locust	0.28051576107564125
1292	edges	locust	0.8202435722531255
1293	edges	locust	2.238766417817978
1294	edges	locust	2.9955327273808954
1295	edges	locust	0.2828491862305503
1296	edges	locust	1.099446522155778
1297	edges	locust	2.4115833021449173
1298	edges	locust	1.1021809351149132
1299	edges	locust	0.36055597397656436
1300	edges	locust	0.806163222061953
1301	edges	locust	0.2088046979636646
1302	edges	locust	0.339996337890625
1303	edges	locust	0.5830928343230806
1304	edges	locust	0.10197823571955102
1305	edges	locust	0.4939676080869801
1306	edges	locust	0.14141919831866576
1307	edges	locust	0.5015984338007089
1308	edges	locust	1.5297067518263738
1309	edges	locust	1.2175394228098617
1310	edges	locust	4.263986242785451
1311	edges	locust	0.21819901609598732
1312	edges	locust	5.686365501121063
1313	edges	locust	5.3579876062741745
1314	edges	locust	3.5600347647619595
1315	edges	locust	0.8510497300958785
1316	edges	locust	0.9475412013570428
1317	edges	locust	0.23409316395424892
1318	edges	locust	0.7911991878100039
1319	edges	locust	0.36055597397656436
1320	edges	locust	0.5249749808176475
1321	edges	locust	0.4669018252980268
1322	edges	locust	0.40248609442029654
1323	edges	locust	0.24413451246715875
1324	edges	locust	0.439094805335029
1325	edges	locust	0.16124553350104862
1326	edges	locust	0.6403133769533894
1327	edges	locust	0.45121888960053436
1328	edges	locust	1.0562197232393404
1329	edges	locust	0.34409246080683525
1330	edges	locust	0.3521095274474063
1331	edges	locust	0.680072784578974
1332	edges	locust	0.7606481892745242
1333	edges	locust	1.0154442802737271
1334	edges	locust	0.7710721456481829
1335	edges	locust	2.8448565780302473
1336	edges	locust	0.36583910363735717
1337	edges	locust	0.29697921109073655
1338	edges	locust	1.0849735368463755
1339	edges	locust	0.4342272387313888
1340	edges	locust	1.5554094314844613
1341	edges	locust	1.3746655817738773
1342	edges	locust	1.6764166467597403
1343	edges	locust	0.46994475842516026
1344	edges	locust	0.24699563439603936
1345	edges	locust	0.3881620493213996
1346	edges	locust	0.17832550909506784
1347	edges	locust	0.8048489637026051
1348	edges	locust	1.3998085369665056
1349	edges	locust	0.6725015420700239
1350	edges	locust	10.629413466158178
1351	edges	locust	0.6080718774060702
1352	edges	locust	0.44810464049981297
1353	edges	locust	0.6527134871869318
1354	edges	locust	0.18534054199683253
1355	edges	locust	0.5624661988826479
1356	edges	locust	0.1528486223951108
1357	edges	locust	1.1322837634679455
1358	edges	locust	0.7957515088029167
1359	edges	locust	0.21477211828348003
1360	edges	locust	0.9864354842426937
1361	edges	locust	0.36739834842759284
1362	edges	locust	2.1056465571140426
1363	edges	locust	2.794890270005429
1364	edges	locust	1.9184339454792725
1365	edges	locust	0.34128574452956273
1366	edges	locust	0.3278870293896558
1367	edges	locust	0.7235411924475137
1368	edges	locust	0.18245084752573446
1369	edges	locust	0.3175520379982503
1370	edges	locust	0.3168053581180392
1371	edges	locust	0.22418127886167225
1372	edges	locust	0.3652832870317568
1373	edges	locust	0.6496212555163611
1374	edges	locust	0.333173708458569
1375	edges	locust	0.381833235579209
1376	edges	locust	0.2667775600044851
1377	edges	locust	0.477927631056593
1378	edges	locust	0.71335901273117
1379	edges	locust	0.12802585957000687
1380	edges	locust	0.21214865565271956
1381	edges	locust	0.4064237563442056
1382	edges	locust	0.2684085440674786
1383	edges	locust	0.4106478654328519
1384	edges	locust	0.2998891138376179
1385	edges	locust	0.9112789995547654
1386	edges	locust	0.11136131780388363
1387	edges	locust	0.23862257251068697
1388	edges	locust	0.5005771197149258
1389	edges	locust	0.36046378848381305
1390	edges	locust	1.1428492671396504
1391	edges	locust	1.5582527304671616
1392	edges	locust	0.8331314221469577
1393	edges	locust	0.27709435843447805
1394	edges	locust	1.519487920857074
1395	edges	locust	1.5322178768021666
1396	edges	locust	0.3580338615692653
1397	edges	locust	0.5153921381944995
1398	edges	locust	0.4429515372269955
1399	edges	locust	0.36065714768098805
1400	edges	locust	0.4821220290803528
1401	edges	locust	0.901578837424576
1402	edges	locust	0.5949886357064652
1403	edges	locust	0.4463588293221131
1404	edges	locust	0.47598580957054354
1405	edges	locust	4.5811903472595
1406	edges	locust	0.8681032354105903
1407	edges	locust	0.47755065232739125
1408	edges	locust	0.5281936719688711
1409	edges	locust	0.8251784933142526
1410	edges	locust	1.9296075311370748
1411	edges	locust	1.1822663551869363
1412	edges	locust	0.9921163170120777
1413	edges	locust	1.7745149978501642
1414	edges	locust	0.7048705562172087
1415	edges	locust	1.4536567641384441
1416	edges	locust	0.29184539107867813
1417	edges	locust	0.27496522029736675
1418	edges	locust	1.2102558855860914
1419	edges	locust	0.5474401306394763
1420	edges	locust	10.033661808020826
1421	edges	locust	1.6939942043565326
1422	edges	locust	0.7808006547471779
1423	edges	locust	0.9508580582732956
1424	edges	locust	0.7361492510878471
1425	edges	locust	0.620528671350062
1426	edges	locust	0.996966988743628
1427	edges	locust	1.4871498674043475
1428	edges	locust	0.9247327965439206
1429	edges	locust	1.4945612601248193
1430	edges	locust	1.758313429557881
1431	edges	locust	1.1013312458044575
1432	edges	locust	0.5445582303326605
1433	edges	locust	2.3012209079084744
1434	edges	locust	2.342592944337752
1435	edges	locust	0.0721116184897412
1436	edges	locust	0.9244172756192544
1437	edges	locust	0.06851658771183898
1438	edges	locust	0.9139444688502932
1439	edges	locust	0.5931042170880236
1440	edges	locust	4.476039259129908
1441	edges	locust	0.3983000085708852
1442	edges	locust	0.27202806398486623
1443	edges	locust	1.4394585833659352
1444	edges	locust	1.043955533730773
1445	edges	locust	1.0536028416554786
1446	edges	locust	0.23062077833005337
1447	edges	locust	0.6976341345615364
1448	edges	locust	0.4608227928465392
1449	edges	locust	0.028284919137531145
1450	edges	locust	0.6090804953741392
1451	edges	locust	0.6648270874230651
1452	edges	locust	0.5011996838161402
1453	edges	locust	0.12165803507367541
1454	edges	locust	0.11662170709485592
1455	edges	locust	1.3281856938515844
1456	edges	locust	0.9462596280617817
1457	edges	locust	0.1456915244407606
1458	edges	locust	0.6578174875756493
1459	edges	locust	0.5231132090373102
1460	edges	locust	0.23337893696661907
1461	edges	locust	0.14019384585525307
1462	edges	locust	0.9019726510370046
1463	edges	locust	0.2416303415962693
1464	edges	locust	0.41073883970651787
1465	edges	locust	0.8672055286953525
1466	edges	locust	0.37261783277033117
1467	edges	locust	0.5203887601480122
1468	edges	locust	0.4049699258841995
1469	edges	locust	0.37362733800929054
1470	edges	locust	0.040719728439506477
1471	edges	locust	0.7866116053959022
1472	edges	locust	0.78724319324131
1473	edges	locust	1.1005636476244278
1474	edges	locust	1.4793041841289498
1475	edges	locust	1.1870921083902801
1476	edges	locust	0.7021244216298134
1477	edges	locust	0.8475027668121033
1478	edges	locust	0.8321674991198253
1479	edges	locust	1.3501132062841614
1480	edges	locust	1.0856048811065488
1481	edges	locust	0.7324658314703907
1482	edges	locust	0.5863418827758388
1483	edges	locust	1.2056252128560647
1484	edges	locust	1.048295869765136
1485	edges	locust	0.49774514772534784
1486	edges	locust	2.1454658217321887
1487	edges	locust	1.4962145393114317
1488	edges	locust	0.7172102266597075
1489	edges	locust	0.48161043395509034
1490	edges	locust	2.3387912318865873
1491	edges	locust	0.4762479368264782
1492	edges	locust	0.48925981168083993
1493	edges	locust	1.0586681657907184
1494	edges	locust	0.7524656670226032
1495	edges	locust	0.9899308188273497
1496	edges	locust	0.20725399557930685
1497	edges	locust	0.4387503127557783
1498	edges	locust	2.1657987264976235
1499	edges	locust	0.7734125916774991
1500	edges	locust	1.5009553284810733
1501	edges	locust	2.2794863811810204
1502	edges	locust	2.4438823492660746
1503	edges	locust	1.6716255151728565
1504	edges	locust	2.5306102341214154
1505	edges	locust	0.60465088916634
1506	edges	locust	1.3009576200908117
1507	edges	locust	0.43863089052928844
1508	edges	locust	0.722773254886476
1509	edges	locust	1.2250541823596888
1510	edges	locust	0.8178975883436891
1511	edges	locust	0.8816319606688061
1512	edges	locust	0.1166203987819285
1513	edges	locust	2.053698462537274
1514	edges	locust	0.47539694814632
1515	edges	locust	2.684973694749373
1516	edges	locust	0.38833648381849123
1517	edges	locust	1.4680294990531673
1518	edges	locust	0.38832587462651225
1519	edges	locust	0.6767597233723281
1520	edges	locust	1.1026511621596942
1521	edges	locust	0.07210950201073472
1522	edges	locust	2.9341066396788262
1523	edges	locust	1.7660567103266158
1524	edges	locust	2.505669269260099
1525	edges	locust	0.07211585005069733
1526	edges	locust	0.5936327186801559
1527	edges	locust	0.690794008612723
1528	edges	locust	0.3417679720817552
1529	edges	locust	1.01961989629802
1530	edges	locust	0.9617523574543767
1531	edges	locust	2.338946711377132
1532	edges	locust	0.4569448235627466
1533	edges	locust	0.4720201556809645
1534	edges	locust	1.6302988976789121
1535	edges	locust	0.7180953337496426
1536	edges	locust	0.6284157042161826
1537	edges	locust	1.18267083568401
1538	edges	locust	0.49279636839287255
1539	edges	locust	0.33106141449274296
1540	edges	locust	0.4952328311508335
1541	edges	locust	0.286372871979974
1542	edges	locust	1.1173800036351966
1543	edges	locust	0.9732752457531485
1544	edges	locust	2.0793569406669365
1545	edges	locust	0.6606074280635523
1546	edges	locust	1.1590686146820204
1547	edges	locust	0.6474486187282067
1548	edges	locust	0.9647540971360693
1549	edges	locust	3.7913784118894416
1550	edges	locust	3.593631839926036
1551	edges	locust	5.426885574181604
1552	edges	locust	1.7730204569022139
1553	edges	locust	2.6014463240209276
1554	edges	locust	13.017226677823846
1555	edges	locust	4.163616682435963
1556	edges	locust	2.9732153880300087
1557	edges	locust	0.49754678067228325
1558	edges	locust	2.756449323784965
1559	edges	locust	2.0391441591082424
1560	edges	locust	0.16705719217920093
1561	edges	locust	0.32227234551492584
1562	edges	locust	0.4276991237612733
1563	edges	locust	1.161734944672375
1564	edges	locust	0.4148448076436278
1565	edges	locust	1.5497289178264262
1566	edges	locust	1.9600180455688534
1567	edges	locust	4.165153276359284
1568	edges	locust	2.1956684433161207
1569	edges	locust	5.377291150521481
1570	edges	locust	10.053510793558184
1571	edges	locust	1.001630423708161
1572	edges	locust	9.018720251378065
1573	edges	locust	1.6177066542885936
1574	edges	locust	0.9651390753400234
1575	edges	locust	0.5409741476732564
1576	edges	locust	0.2997746380033055
1577	edges	locust	0.28669157110152005
1578	edges	locust	0.749395949789877
1579	edges	locust	0.3509368632525029
1580	edges	locust	0.6512258938205612
1581	edges	locust	0.5220534792804886
1582	edges	locust	0.5833258851532941
1583	edges	locust	1.213463357545449
1584	edges	locust	1.7532489464335306
1585	edges	locust	2.0933496789166948
1586	edges	locust	0.715822400398903
1587	edges	locust	2.064576198197475
1588	edges	locust	1.3543443213676651
1589	edges	locust	0.7272742886598887
1590	edges	locust	0.5687363654057661
1591	edges	locust	1.3255184868777004
1592	edges	locust	0.4309466231167238
1593	edges	locust	0.261101228372427
1594	edges	locust	0.09804665209841278
1595	edges	locust	1.183185046830561
1596	edges	locust	0.24611970369309996
1597	edges	locust	0.5234667575785511
1598	edges	locust	0.1913709998606113
1599	edges	locust	0.8258724329046839
1600	edges	locust	1.5561629349872177
1601	edges	locust	1.239187443708866
1602	edges	locust	2.1427654322439795
1603	edges	locust	0.5742980635324124
1604	edges	locust	0.9811379555563466
1605	edges	locust	0.5995181885098115
1606	edges	locust	0.7418672633589355
1607	edges	locust	1.3240382906305854
1608	edges	locust	1.2174102155448034
1609	edges	locust	1.629425579387454
1610	edges	locust	0.3521095274474063
1611	edges	locust	0.680072784578974
1612	edges	locust	0.7606481892745242
1613	edges	locust	1.8118665608927171
1614	edges	locust	0.9658126391313546
1615	edges	locust	0.9293572901188651
1616	edges	locust	1.0911245579625697
1617	edges	locust	0.29697921109073655
1618	edges	locust	0.7876494045937642
1619	edges	locust	0.4342272387313888
1620	edges	locust	0.9717285462745324
1621	edges	locust	1.8537587170403391
1622	edges	locust	1.6764166467597403
1623	edges	locust	0.46994475842516026
1624	edges	locust	0.24699563439603936
1625	edges	locust	0.3881620493213996
1626	edges	locust	0.17832550909506784
1627	edges	locust	0.8866926130153726
1628	edges	locust	0.6647956159285786
1629	edges	locust	0.6725015420700239
1630	edges	locust	11.262702684686458
1631	edges	locust	0.6080718774060702
1632	edges	locust	0.44810464049981297
1633	edges	locust	0.6527134871869318
1634	edges	locust	0.18534054199683253
1635	edges	locust	0.5624661988826479
1636	edges	locust	0.1528486223951108
1637	edges	locust	1.1322837634679455
1638	edges	locust	0.7957515088029167
1639	edges	locust	0.21477211828348003
1640	edges	locust	0.9864354842426937
1641	edges	locust	0.36739834842759284
1642	edges	locust	2.1056465571140426
1643	edges	locust	0.6770570686140693
1644	edges	locust	1.9184339454792725
1645	edges	locust	1.5296406028008716
1646	edges	locust	0.5993628866575067
1647	edges	locust	0.1704609278715765
1648	edges	locust	1.4557777238117433
1649	edges	locust	0.4184842652808718
1650	edges	locust	2.1753106744475557
1651	edges	locust	1.1545176923356577
1652	edges	locust	0.7366892360998412
1653	edges	locust	2.573497588892146
1654	edges	locust	1.8652651152833282
1655	edges	locust	2.85087190238886
1656	edges	locust	1.7294578986479996
1657	edges	locust	1.2221849734319663
1658	edges	locust	0.5441732848279489
1659	edges	locust	3.7133160439087596
1660	edges	locust	2.753585530361387
1661	edges	locust	0.5949357342958125
1662	edges	locust	0.4896495998601649
1663	edges	locust	2.2924370396806553
1664	edges	locust	1.555126287418607
1665	edges	locust	5.070168457795887
1666	edges	locust	1.6993783798133943
1667	edges	locust	1.7771897608009075
1668	edges	locust	1.3866752899310337
1669	edges	locust	1.9407159690819413
1670	edges	locust	1.833657276892819
1671	edges	locust	1.8857140708741458
1672	edges	locust	1.6032374920487638
1673	edges	locust	1.6290725871167506
1674	edges	locust	3.9632593702946903
1675	edges	locust	1.2392806259577729
1676	edges	locust	2.2912884365145025
1677	edges	locust	1.2401039823527704
1678	edges	locust	1.5095845538871036
1679	edges	locust	0.8708557875418876
1680	edges	locust	0.2340957711770289
1681	edges	locust	0.5433237486136419
1682	edges	locust	0.412311672805901
1683	edges	locust	0.6551328474949638
1684	edges	locust	0.07211373420036164
1685	edges	locust	0.23323294676145154
1686	edges	locust	0.6440498581334161
1687	edges	locust	0.596654900525322
1688	edges	locust	0.7400061117729271
1689	edges	locust	0.5440603348552799
1690	edges	locust	0.8170710361644676
1691	edges	locust	0.25999890842626444
1692	edges	locust	0.10000000004656613
1693	edges	locust	0.32984767288661515
1694	edges	locust	0.5813795638563639
1695	edges	locust	0.4404567705850563
1696	edges	locust	0.4951799038966981
1697	edges	locust	0.7271892584038776
1698	edges	locust	0.31240932280114175
1699	edges	locust	0.18868394117497547
1700	edges	locust	0.26832406295891603
1701	edges	locust	0.3026580649958405
1702	edges	locust	0.19798903556477582
1703	edges	locust	0.1456018624364425
1704	edges	locust	0.15231694484673727
1705	edges	locust	0.24412826220682285
1706	edges	locust	0.4939600399329647
1707	edges	locust	0.43863610858158253
1708	edges	locust	2.0522181067605074
1709	edges	locust	1.1627580778800646
1710	edges	locust	0.4294143592282263
1711	edges	locust	0.5720156077287818
1712	edges	locust	0.18868191941719828
1713	edges	locust	0.5234485190147141
1714	edges	locust	0.2785692116350159
1715	edges	locust	0.6811758130484239
1716	edges	locust	0.8325260940693947
1717	edges	locust	0.6509120282183598
1718	edges	locust	0.4607074430698428
1719	edges	locust	0.777709283057571
1720	edges	locust	0.6556239992616127
1721	edges	locust	0.7279447032468982
1722	edges	locust	0.12806243711037915
1723	edges	locust	0.8522479727351882
1724	edges	locust	1.00562361263751
1725	edges	locust	1.293141717871487
1726	edges	locust	0.35439695908060936
1727	edges	locust	0.30664971360869664
1728	edges	locust	0.11620248637619923
1729	edges	locust	0.6821785345765952
1730	edges	locust	2.523450722116239
1731	edges	locust	0.2599974412191119
1732	edges	locust	0.8655494084024373
1733	edges	locust	0.3538306349071556
1734	edges	locust	0.21260527037292862
1735	edges	locust	0.10799888121264194
1736	edges	locust	0.7570570820091357
1737	edges	locust	1.0984719314126183
1738	edges	locust	0.5667844072729604
1739	edges	locust	0.8371721035039338
1740	edges	locust	1.1338526133200482
1741	edges	locust	2.563147080661101
1742	edges	locust	2.641568480502436
1743	edges	locust	0.33360948968641074
1744	edges	locust	1.8214835347641847
1745	edges	locust	9.747471158253944
1746	edges	locust	0.24331607014735082
1747	edges	locust	1.6717612807818056
1748	edges	locust	2.580069038928631
1749	edges	locust	0.5841130681654231
1750	edges	locust	0.9484498013939808
1751	edges	locust	1.0324713116639026
1752	edges	locust	0.9791865961275132
1753	edges	locust	0.9877709423395613
1754	edges	locust	1.243378694717452
1755	edges	locust	1.7347115991365427
1756	edges	locust	1.4217596796083403
1757	edges	locust	0.7677455642500131
1758	edges	locust	0.9418813123646992
1759	edges	locust	1.0638160324441164
1760	edges	locust	1.3761995920957255
1761	edges	locust	0.706950578308879
1762	edges	locust	1.3100733728044167
1763	edges	locust	0.8515692274050124
1764	edges	locust	0.7906431854270085
1765	edges	locust	1.2265532344948449
1766	edges	locust	0.1908897676946945
1767	edges	locust	1.9174170400642183
1768	edges	locust	1.5449564726740115
1769	edges	locust	0.29686760266367523
1770	edges	locust	0.7793809378770478
1771	edges	locust	0.7508793638247575
1772	edges	locust	0.2590973344253931
1773	edges	locust	0.5104296437778034
1774	edges	locust	0.9039748050746877
1775	edges	locust	1.1058599408485243
1776	edges	locust	1.1190154487487163
1777	edges	locust	0.2894398498327028
1778	edges	locust	0.6637322585897721
1779	edges	locust	0.32609807293048265
1780	edges	locust	0.981631625600456
1781	edges	locust	1.2937163880854277
1782	edges	locust	1.692607594306591
1783	edges	locust	1.0989989052738898
1784	edges	locust	1.7557516977892744
1785	edges	locust	0.45651041369975165
1786	edges	locust	0.5325448145531615
1787	edges	locust	0.5440617371788962
1788	edges	locust	0.6514107444038169
1789	edges	locust	0.20100211289038403
1790	edges	locust	0.43613858900141106
1791	edges	locust	0.932379071374996
1792	edges	locust	0.15620612668451347
1793	edges	locust	0.8485313743189722
1794	edges	locust	0.14142135630316396
1795	edges	locust	0.7630636127897656
1796	edges	locust	1.5450896819370443
1797	edges	locust	0.8845835111521635
1798	edges	locust	3.277258567372506
1799	edges	locust	0.6910515296156884
1800	edges	locust	3.127209712180217
1801	edges	locust	0.48166403658680046
1802	edges	locust	1.180674294962264
1803	edges	locust	0.15231544208891898
1804	edges	locust	0.6997870428810218
1805	edges	locust	0.6931514421823954
1806	edges	locust	0.18439138566212923
1807	edges	locust	0.46518516874853555
1808	edges	locust	0.18439138566212923
1809	edges	locust	0.6657373731639885
1810	edges	locust	0.5660433320263739
1811	edges	locust	0.5905930051300898
1812	edges	locust	0.8858874407180803
1813	edges	locust	1.4962658150187989
1814	edges	locust	1.1727952045473722
1815	edges	locust	1.6881813364935943
1816	edges	locust	1.319392541925671
1817	edges	locust	0.35383624101884437
1818	edges	locust	0.2720325513597153
1819	edges	locust	3.664801429691042
1820	edges	locust	0.3988036799682383
1821	edges	locust	0.6691910406112729
1822	edges	locust	1.0467426281537437
1823	edges	locust	1.2027137989602585
1824	edges	locust	0.5423965263876287
1825	edges	locust	1.7048668421111044
1826	edges	locust	0.6656935645827065
1827	edges	locust	0.6289169286246239
1828	edges	locust	0.7949046658512118
1829	edges	locust	0.6115502916660431
1830	edges	locust	1.3746511676884454
1831	edges	locust	0.7376043891739351
1832	edges	locust	0.2133047878984356
1833	edges	locust	1.571136758668188
1834	edges	locust	2.2661016717987983
1835	edges	locust	1.757238436516078
1836	edges	locust	1.5233389853280532
1837	edges	locust	1.426929374414923
1838	edges	locust	0.39886148841782865
1839	edges	locust	0.2774059595830744
1840	edges	locust	0.770000322475083
1841	edges	locust	0.4973633835475826
1842	edges	locust	0.6144282600104007
1843	edges	locust	0.5475351458690142
1844	edges	locust	0.12370318934180204
1845	edges	locust	2.1175676261455876
1846	edges	locust	0.882896356517015
1847	edges	locust	1.0787012684408137
1848	edges	locust	1.0714563679231064
1849	edges	locust	1.1241683706968455
1850	edges	locust	0.5826742170371774
1851	edges	locust	1.6022247115801964
1852	edges	locust	1.5592469729294982
1853	edges	locust	0.20690886935443123
1854	edges	locust	0.30695823363856023
1855	edges	locust	0.8529849439406393
1856	edges	locust	0.3526220045276023
1857	edges	locust	0.5252949585054418
1858	edges	locust	0.2847397720087248
1859	edges	locust	0.2946907295422224
1860	edges	locust	1.1793680603450645
1861	edges	locust	1.2489149228038683
1862	edges	locust	0.3787636857081303
1863	edges	locust	0.9744213357811948
1864	edges	locust	0.48704183745691676
1865	edges	locust	0.7580998735159526
1866	edges	locust	0.3687214126069119
1867	edges	locust	0.3449535632107134
1868	edges	locust	1.2013175039750232
1869	edges	locust	0.9023887813833372
1870	edges	locust	0.40305026137114247
1871	edges	locust	0.8171002048910211
1872	edges	locust	2.510024080877172
1873	edges	locust	1.9340290022545399
1874	edges	locust	1.8775961535589027
1875	edges	locust	1.6613106483152602
1876	edges	locust	0.7962514366011846
1877	edges	locust	0.6682972469284688
1878	edges	locust	0.7907492582297612
1879	edges	locust	0.910453185190806
1880	edges	locust	1.8289537115276153
1881	edges	locust	1.2387226892501266
1882	edges	locust	1.4706585463029778
1883	edges	locust	0.8943839876232447
1884	edges	locust	0.9223758517755435
1885	edges	locust	0.8218924644912067
1886	edges	locust	1.0978368534750467
1887	edges	locust	0.618891252477529
1888	edges	locust	0.9717363822319894
1889	edges	locust	1.4234220186654267
1890	edges	locust	0.5245178081410037
1891	edges	locust	0.766309862076788
1892	edges	locust	0.5733676684936794
1893	edges	locust	0.6713498817637493
1894	edges	locust	0.47644672865417914
1895	edges	locust	17.07206375777703
1896	edges	locust	0.6137704639017808
1897	edges	locust	0.6630631022582544
1898	edges	locust	0.24425118419632222
1899	edges	locust	0.4878392633768145
1900	edges	locust	0.8355790304016774
1901	edges	locust	0.6385683650018225
1902	edges	locust	0.2719349095022012
1903	edges	locust	0.8405415557604189
1904	edges	locust	0.3948934263479747
1905	edges	locust	0.04481110823514632
1906	edges	locust	0.11311178513314232
1907	edges	locust	0.39896174103544013
1908	edges	locust	0.17392192786175617
1909	edges	locust	0.4114514783776239
1910	edges	locust	0.9313334277131452
1911	edges	locust	0.6247230102574883
1912	edges	locust	0.49583468636831945
1913	edges	locust	0.7890814089455239
1914	edges	locust	0.41824249789735346
1915	edges	locust	0.3323020012722791
1916	edges	locust	0.25033935364622983
1917	edges	locust	0.7851679931759549
1918	edges	locust	0.24897490667354552
1919	edges	locust	0.4940858735635142
1920	edges	locust	0.33614900962025973
1921	edges	locust	0.22791716980987878
1922	edges	locust	0.6889075713415956
1923	edges	locust	0.4220766760544025
1924	edges	locust	0.46827562223396413
1925	edges	locust	0.3959779229849623
1926	edges	locust	0.22286722943638435
1927	edges	locust	0.49362145880626296
1928	edges	locust	1.0349463304679143
1929	edges	locust	0.36797881316933756
1930	edges	locust	0.47869964102252094
1931	edges	locust	0.278397852385547
1932	edges	locust	0.32412529704311627
1933	edges	locust	1.0834850520133557
1934	edges	locust	1.0236621411050595
1935	edges	locust	2.453687844053161
1936	edges	locust	1.2252344476182384
1937	edges	locust	0.8001455210594569
1938	edges	locust	1.149628616791248
1939	edges	locust	0.90907711424561
1940	edges	locust	0.7379196784787873
1941	edges	locust	1.2700562459278484
1942	edges	locust	1.057615021810276
1943	edges	locust	0.3718253655533289
1944	edges	locust	1.1984720326643306
1945	edges	locust	0.6792551767824011
1946	edges	locust	0.3816250958470775
1947	edges	locust	0.07997439735543639
1948	edges	locust	1.5640378051861894
1949	edges	locust	0.5015875428364027
1950	edges	locust	1.9496883427411025
1951	edges	locust	1.031294010136175
1952	edges	locust	1.320267768091478
1953	edges	locust	0.959469172738797
1954	edges	locust	0.9387648147642746
1955	edges	locust	0.5829633418031931
1956	edges	locust	1.826023105309981
1957	edges	locust	0.9843041284530968
1958	edges	locust	1.1996645811252316
1959	edges	locust	0.43981890096088644
1960	edges	locust	0.2966079195605753
1961	edges	locust	0.7251988659260663
1962	edges	locust	0.09920374443409845
1963	edges	locust	0.7630531299050846
1964	edges	locust	0.3424240057809024
1965	edges	locust	5.562065837560514
1966	edges	locust	0.6535156577060658
1967	edges	locust	0.5123988530362527
1968	edges	locust	0.867425645242907
1969	edges	locust	1.9364093257976
1970	edges	locust	0.6471863134451771
1971	edges	locust	1.0405629801486231
1972	edges	locust	0.39893032325181454
1973	edges	locust	0.8931715021430366
1974	edges	locust	2.6378405339518536
1975	edges	locust	1.3045122233758715
1976	edges	locust	0.4747696499614315
1977	edges	locust	0.7279314393815047
1978	edges	locust	1.7196312978526889
1979	edges	locust	1.982719934565921
1980	edges	locust	3.2124164865185016
1981	edges	locust	0.5928078795228844
1982	edges	locust	0.9021931691533214
1983	edges	locust	0.6838690778945377
1984	edges	locust	0.5175611268355481
1985	edges	locust	1.184294392569619
1986	edges	locust	0.5228738827197533
1987	edges	locust	0.3172594407215087
1988	edges	locust	0.21504849616403385
1989	edges	locust	2.285747645474794
1990	edges	locust	0.513000699033154
1991	edges	locust	0.7921877727356151
1992	edges	locust	0.49475040034017725
1993	edges	locust	4.376825307779398
1994	edges	locust	5.581276569210155
1995	edges	locust	0.34828592846424955
1996	edges	locust	0.36560800886938
1997	edges	locust	0.6411986905514626
1998	edges	locust	0.26579818060743005
[truncated: 13,401 more rows]
