# Supplementary material for: DeepPoseKit, a software toolkit for fast and robust animal pose estimation using deep learning
Source: eLife. 2019 Oct 1;8:e47994. doi: 10.7554/eLife.47994 (PMC6897514; doi:10.7554/eLife.47994)
Supplement: Appendix 1—figure 3—source data 1. [file elife-47994-app1-fig3-data1.csv]

	time	model
0	1.9377777777777778	S. DenseNet
1	2.151111111111111	S. DenseNet
2	2.4355555555555557	S. DenseNet
3	2.933333333333333	S. DenseNet
4	2.897777777777778	S. DenseNet
5	2.6844444444444444	S. DenseNet
6	3.928888888888889	S. DenseNet
7	2.062222222222222	S. DenseNet
8	3.2355555555555555	S. DenseNet
9	2.382222222222222	S. DenseNet
10	2.8266666666666667	S. DenseNet
11	4.8533333333333335	S. DenseNet
12	4.8	S. DenseNet
13	2.968888888888889	S. DenseNet
0	2.0416666666666665	DeepLabCut
1	2.0416666666666665	DeepLabCut
2	2.7083333333333335	DeepLabCut
3	2.4166666666666665	DeepLabCut
4	2.7916666666666665	DeepLabCut
5	2.8333333333333335	DeepLabCut
6	3.7916666666666665	DeepLabCut
7	3.9583333333333335	DeepLabCut
8	2.8541666666666665	DeepLabCut
9	3.6666666666666665	DeepLabCut
10	4.0	DeepLabCut
11	2.9583333333333335	DeepLabCut
12	3.6875	DeepLabCut
13	5.229166666666667	DeepLabCut
0	1.8416666666666666	LEAP
1	3.0316666666666667	LEAP
2	2.578333333333333	LEAP
3	2.72	LEAP
4	2.691666666666667	LEAP
5	2.4366666666666665	LEAP
6	3.4566666666666666	LEAP
7	2.9466666666666668	LEAP
8	3.485	LEAP
9	5.638333333333334	LEAP
10	4.675	LEAP
11	4.5616666666666665	LEAP
12	3.6266666666666665	LEAP
