# Supplementary material for: DeepPoseKit, a software toolkit for fast and robust animal pose estimation using deep learning
Source: eLife. 2019 Oct 1;8:e47994. doi: 10.7554/eLife.47994 (PMC6897514; doi:10.7554/eLife.47994)
Supplement: Appendix 1—figure 3—source data 2. [file elife-47994-app1-fig3-data2.csv]

	val_loss	training time (hours)	model	iter
0	13.130499308966158	0.0	S. DenseNet	0
1	10.615106264151333	0.017777777777777778	S. DenseNet	0
2	10.288599774071049	0.035555555555555556	S. DenseNet	0
3	6.673912975273116	0.05333333333333334	S. DenseNet	0
4	8.938039655060917	0.07111111111111111	S. DenseNet	0
5	8.018928847425721	0.08888888888888889	S. DenseNet	0
6	6.203323161923496	0.10666666666666667	S. DenseNet	0
7	7.16141812858273	0.12444444444444444	S. DenseNet	0
8	7.567008635322274	0.14222222222222222	S. DenseNet	0
9	5.7371821504718925	0.16	S. DenseNet	0
10	6.110444965781061	0.17777777777777778	S. DenseNet	0
11	6.097631976936183	0.19555555555555557	S. DenseNet	0
12	6.837102240461426	0.21333333333333335	S. DenseNet	0
13	4.597955322342303	0.2311111111111111	S. DenseNet	0
14	6.082291194890555	0.24888888888888888	S. DenseNet	0
15	6.216626817946933	0.26666666666666666	S. DenseNet	0
16	4.928508100571699	0.28444444444444444	S. DenseNet	0
17	6.33716594891891	0.3022222222222222	S. DenseNet	0
18	5.774723766382264	0.32	S. DenseNet	0
19	6.117856810015566	0.3377777777777778	S. DenseNet	0
20	6.17169307523774	0.35555555555555557	S. DenseNet	0
21	6.099895044457635	0.37333333333333335	S. DenseNet	0
22	4.951864379751262	0.39111111111111113	S. DenseNet	0
23	5.67692594994343	0.4088888888888889	S. DenseNet	0
24	4.510428277271669	0.4266666666666667	S. DenseNet	0
25	4.504941849927411	0.4444444444444444	S. DenseNet	0
26	6.24105207105297	0.4622222222222222	S. DenseNet	0
27	5.41851034278184	0.48	S. DenseNet	0
28	5.980081779343816	0.49777777777777776	S. DenseNet	0
29	5.850948943854307	0.5155555555555555	S. DenseNet	0
30	5.763087992092372	0.5333333333333333	S. DenseNet	0
31	3.8051799309352226	0.5511111111111111	S. DenseNet	0
32	6.553865317668864	0.5688888888888889	S. DenseNet	0
33	5.185426445166917	0.5866666666666667	S. DenseNet	0
34	5.770261009196383	0.6044444444444445	S. DenseNet	0
35	5.300867019208229	0.6222222222222222	S. DenseNet	0
36	4.143876573133859	0.64	S. DenseNet	0
37	4.590918899744584	0.6577777777777778	S. DenseNet	0
38	5.0449087274404825	0.6755555555555556	S. DenseNet	0
39	4.87554535466201	0.6933333333333334	S. DenseNet	0
40	4.985566391777171	0.7111111111111111	S. DenseNet	0
41	5.264243315844984	0.7288888888888889	S. DenseNet	0
42	4.512351152133991	0.7466666666666667	S. DenseNet	0
43	4.4383236176175105	0.7644444444444445	S. DenseNet	0
44	3.8529383918370597	0.7822222222222223	S. DenseNet	0
45	4.688082807872563	0.8	S. DenseNet	0
46	4.13277537915738	0.8177777777777778	S. DenseNet	0
47	4.574301175006711	0.8355555555555556	S. DenseNet	0
48	4.468347373550075	0.8533333333333334	S. DenseNet	0
49	3.9435726023149402	0.8711111111111111	S. DenseNet	0
50	3.485364696908416	0.8888888888888888	S. DenseNet	0
51	4.3195071706395245	0.9066666666666666	S. DenseNet	0
52	3.827563493594582	0.9244444444444444	S. DenseNet	0
53	3.9001734586332932	0.9422222222222222	S. DenseNet	0
54	4.032216412734038	0.96	S. DenseNet	0
55	3.9701392767683035	0.9777777777777777	S. DenseNet	0
56	4.040548961010515	0.9955555555555555	S. DenseNet	0
57	3.865408664115655	1.0133333333333334	S. DenseNet	0
58	3.906063779913814	1.031111111111111	S. DenseNet	0
59	4.146712878663048	1.048888888888889	S. DenseNet	0
60	4.873552504992831	1.0666666666666667	S. DenseNet	0
61	4.591840621841767	1.0844444444444445	S. DenseNet	0
62	4.134119756381724	1.1022222222222222	S. DenseNet	0
63	4.222067485445678	1.12	S. DenseNet	0
64	3.7832420395859794	1.1377777777777778	S. DenseNet	0
65	3.781179039317518	1.1555555555555554	S. DenseNet	0
66	4.345535826513695	1.1733333333333333	S. DenseNet	0
67	4.03733157610288	1.191111111111111	S. DenseNet	0
68	3.5831060519690783	1.208888888888889	S. DenseNet	0
69	3.6300715241148125	1.2266666666666666	S. DenseNet	0
70	4.039481136088587	1.2444444444444445	S. DenseNet	0
71	3.8666853785166424	1.2622222222222221	S. DenseNet	0
72	3.573761387948823	1.28	S. DenseNet	0
73	3.717400883052688	1.2977777777777777	S. DenseNet	0
74	3.719530114484033	1.3155555555555556	S. DenseNet	0
75	3.696936803599716	1.3333333333333333	S. DenseNet	0
76	3.7058513361132377	1.3511111111111112	S. DenseNet	0
77	4.04523017071888	1.3688888888888888	S. DenseNet	0
78	3.537517847841251	1.3866666666666667	S. DenseNet	0
79	4.3345707772314634	1.4044444444444444	S. DenseNet	0
80	3.9620964451703435	1.4222222222222223	S. DenseNet	0
81	4.298737093646575	1.44	S. DenseNet	0
82	3.7847950530525343	1.4577777777777778	S. DenseNet	0
83	3.694535730138973	1.4755555555555555	S. DenseNet	0
84	3.78611506272538	1.4933333333333334	S. DenseNet	0
85	3.8087698373515826	1.511111111111111	S. DenseNet	0
86	3.6723838696434896	1.528888888888889	S. DenseNet	0
87	3.734072941848496	1.5466666666666666	S. DenseNet	0
88	3.737826993186675	1.5644444444444445	S. DenseNet	0
89	3.756131272480455	1.5822222222222222	S. DenseNet	0
90	3.5126513608740133	1.6	S. DenseNet	0
91	3.6013706567971395	1.6177777777777778	S. DenseNet	0
92	3.5953431137296836	1.6355555555555557	S. DenseNet	0
93	3.779869718306615	1.6533333333333333	S. DenseNet	0
94	3.8593472664619703	1.6711111111111112	S. DenseNet	0
95	3.961421917046073	1.6888888888888889	S. DenseNet	0
96	3.6381735367003656	1.7066666666666668	S. DenseNet	0
97	3.7082214947201924	1.7244444444444444	S. DenseNet	0
98	3.955903111966025	1.7422222222222221	S. DenseNet	0
99	3.883279871545344	1.76	S. DenseNet	0
100	3.916550474580081	1.7777777777777777	S. DenseNet	0
101	3.8359265680988366	1.7955555555555556	S. DenseNet	0
102	3.746971927245316	1.8133333333333332	S. DenseNet	0
103	3.6439626975013817	1.8311111111111111	S. DenseNet	0
104	3.596418585848971	1.8488888888888888	S. DenseNet	0
105	3.7126824390438724	1.8666666666666667	S. DenseNet	0
106	3.715205688225656	1.8844444444444444	S. DenseNet	0
107	3.679626656100845	1.9022222222222223	S. DenseNet	0
108	3.6307039989779675	1.92	S. DenseNet	0
109	3.5882549616116504	1.9377777777777778	S. DenseNet	0
110	3.580540172151531	1.9555555555555555	S. DenseNet	0
111	3.5984795639953475	1.9733333333333334	S. DenseNet	0
112	3.5306797202969427	1.991111111111111	S. DenseNet	0
113	3.5278803137833403	2.008888888888889	S. DenseNet	0
114	3.540978243296845	2.026666666666667	S. DenseNet	0
115	3.5915355163338765	2.0444444444444443	S. DenseNet	0
116	3.6067009311440565	2.062222222222222	S. DenseNet	0
117	3.596874948450134	2.08	S. DenseNet	0
118	3.615242872976458	2.097777777777778	S. DenseNet	0
119	3.566618360635009	2.1155555555555554	S. DenseNet	0
120	3.53923250374655	2.1333333333333333	S. DenseNet	0
121	3.5257819135817368	2.151111111111111	S. DenseNet	0
122	3.524303741105755	2.168888888888889	S. DenseNet	0
123	3.515010571477148	2.1866666666666665	S. DenseNet	0
124	3.5185407849514285	2.2044444444444444	S. DenseNet	0
125	3.5196424315736317	2.2222222222222223	S. DenseNet	0
126	3.523634417968026	2.24	S. DenseNet	0
127	3.526992245367496	2.2577777777777777	S. DenseNet	0
128	3.5364468522731367	2.2755555555555556	S. DenseNet	0
129	3.549659152091488	2.2933333333333334	S. DenseNet	0
130	3.5426741434758493	2.311111111111111	S. DenseNet	0
131	3.5447421339670804	2.328888888888889	S. DenseNet	0
132	3.5575172981772245	2.3466666666666667	S. DenseNet	0
133	3.551707041465906	2.3644444444444446	S. DenseNet	0
134	3.5520017174705125	2.382222222222222	S. DenseNet	0
135	3.542835182088218	2.4	S. DenseNet	0
136	3.568905774028951	2.417777777777778	S. DenseNet	0
137	3.5669854448493687	2.4355555555555557	S. DenseNet	0
138	3.5466499147312964	2.453333333333333	S. DenseNet	0
139	3.5542875893148325	2.471111111111111	S. DenseNet	0
140	3.5636195513749107	2.488888888888889	S. DenseNet	0
141	3.5552255684010743	2.506666666666667	S. DenseNet	0
142	3.5385433986861754	2.5244444444444443	S. DenseNet	0
143	3.5484477679584505	2.542222222222222	S. DenseNet	0
144	3.5394863328407142	2.56	S. DenseNet	0
145	3.5442909208176085	2.577777777777778	S. DenseNet	0
146	3.5434192454627076	2.5955555555555554	S. DenseNet	0
147	3.5663911433790343	2.6133333333333333	S. DenseNet	0
148	3.5325076440792245	2.631111111111111	S. DenseNet	0
149	3.5494418018723874	2.648888888888889	S. DenseNet	0
150	3.558691609040881	2.6666666666666665	S. DenseNet	0
151	3.553378734252501	2.6844444444444444	S. DenseNet	0
152	3.5363919566619035	2.7022222222222223	S. DenseNet	0
153	3.5220963199164186	2.72	S. DenseNet	0
154	3.5500498203683435	2.7377777777777776	S. DenseNet	0
155	3.560280089005791	2.7555555555555555	S. DenseNet	0
156	3.5449425517507116	2.7733333333333334	S. DenseNet	0
157	3.540457128549007	2.7911111111111113	S. DenseNet	0
158	3.5579129079102216	2.8088888888888888	S. DenseNet	0
159	3.565293345407166	2.8266666666666667	S. DenseNet	0
160	3.551976330115163	2.8444444444444446	S. DenseNet	0
161	3.555347799771557	2.862222222222222	S. DenseNet	0
162	3.5506769502995765	2.88	S. DenseNet	0
0	26.105225663135773	0.0	S. DenseNet	1
1	20.765228672447677	0.017777777777777778	S. DenseNet	1
2	15.164296749682546	0.035555555555555556	S. DenseNet	1
3	12.801518550987796	0.05333333333333334	S. DenseNet	1
4	13.339924885934499	0.07111111111111111	S. DenseNet	1
5	9.02486672883075	0.08888888888888889	S. DenseNet	1
6	9.555544180515561	0.10666666666666667	S. DenseNet	1
7	8.158341182199907	0.12444444444444444	S. DenseNet	1
8	8.227229976414502	0.14222222222222222	S. DenseNet	1
9	6.557924418000694	0.16	S. DenseNet	1
10	8.138215092853978	0.17777777777777778	S. DenseNet	1
11	7.49345439230824	0.19555555555555557	S. DenseNet	1
12	4.757007494089739	0.21333333333333335	S. DenseNet	1
13	7.537558783186343	0.2311111111111111	S. DenseNet	1
14	6.349375090592704	0.24888888888888888	S. DenseNet	1
15	5.709163806182268	0.26666666666666666	S. DenseNet	1
16	5.105346144435002	0.28444444444444444	S. DenseNet	1
17	4.258904091317933	0.3022222222222222	S. DenseNet	1
18	4.471065788671541	0.32	S. DenseNet	1
19	4.365993564214889	0.3377777777777778	S. DenseNet	1
20	5.125031180921318	0.35555555555555557	S. DenseNet	1
21	5.440630574793049	0.37333333333333335	S. DenseNet	1
22	4.558330016409482	0.39111111111111113	S. DenseNet	1
23	5.070295534065474	0.4088888888888889	S. DenseNet	1
24	4.17763531627536	0.4266666666666667	S. DenseNet	1
25	6.072168482223558	0.4444444444444444	S. DenseNet	1
26	5.385733000876048	0.4622222222222222	S. DenseNet	1
27	3.564223494608572	0.48	S. DenseNet	1
28	4.410513613055452	0.49777777777777776	S. DenseNet	1
29	3.6905196501457285	0.5155555555555555	S. DenseNet	1
30	3.4646104429662508	0.5333333333333333	S. DenseNet	1
31	4.415478099783888	0.5511111111111111	S. DenseNet	1
32	3.976728004514345	0.5688888888888889	S. DenseNet	1
33	5.5080455467656915	0.5866666666666667	S. DenseNet	1
34	4.29714037477557	0.6044444444444445	S. DenseNet	1
35	4.1636038740882295	0.6222222222222222	S. DenseNet	1
36	3.8269945788797486	0.64	S. DenseNet	1
37	4.662701367183421	0.6577777777777778	S. DenseNet	1
38	3.2050439674506968	0.6755555555555556	S. DenseNet	1
39	3.993339330265429	0.6933333333333334	S. DenseNet	1
40	4.288962407135075	0.7111111111111111	S. DenseNet	1
41	3.6263489125463826	0.7288888888888889	S. DenseNet	1
42	3.4878482212912485	0.7466666666666667	S. DenseNet	1
43	3.301891226703459	0.7644444444444445	S. DenseNet	1
44	3.399659713038586	0.7822222222222223	S. DenseNet	1
45	3.4913980979038226	0.8	S. DenseNet	1
46	3.489078501888994	0.8177777777777778	S. DenseNet	1
47	3.235812607401049	0.8355555555555556	S. DenseNet	1
48	3.1179635351717585	0.8533333333333334	S. DenseNet	1
49	3.2911664238139977	0.8711111111111111	S. DenseNet	1
50	3.4175227029547397	0.8888888888888888	S. DenseNet	1
51	3.17453054846725	0.9066666666666666	S. DenseNet	1
52	3.3107469232225553	0.9244444444444444	S. DenseNet	1
53	3.2613804864530036	0.9422222222222222	S. DenseNet	1
54	3.0051833410210747	0.96	S. DenseNet	1
55	3.140630088902409	0.9777777777777777	S. DenseNet	1
56	3.185922738302295	0.9955555555555555	S. DenseNet	1
57	3.080486015955356	1.0133333333333334	S. DenseNet	1
58	3.247533764131503	1.031111111111111	S. DenseNet	1
59	2.929465949276418	1.048888888888889	S. DenseNet	1
60	3.403352160958181	1.0666666666666667	S. DenseNet	1
61	3.406167755946242	1.0844444444444445	S. DenseNet	1
62	2.9068464839858588	1.1022222222222222	S. DenseNet	1
63	3.403333060129702	1.12	S. DenseNet	1
64	2.974490290433758	1.1377777777777778	S. DenseNet	1
65	2.846352984994229	1.1555555555555554	S. DenseNet	1
66	2.9067130202873073	1.1733333333333333	S. DenseNet	1
67	3.0492679020270206	1.191111111111111	S. DenseNet	1
68	3.342214613252593	1.208888888888889	S. DenseNet	1
69	2.9159116354201027	1.2266666666666666	S. DenseNet	1
70	2.9621610621002197	1.2444444444444445	S. DenseNet	1
71	3.206917154660453	1.2622222222222221	S. DenseNet	1
72	2.7327291824792534	1.28	S. DenseNet	1
73	2.989717427038905	1.2977777777777777	S. DenseNet	1
74	2.734214241417023	1.3155555555555556	S. DenseNet	1
75	2.967844561646357	1.3333333333333333	S. DenseNet	1
76	3.0085361656994962	1.3511111111111112	S. DenseNet	1
77	2.984031462725006	1.3688888888888888	S. DenseNet	1
78	3.249282545897652	1.3866666666666667	S. DenseNet	1
79	3.2351464171927606	1.4044444444444444	S. DenseNet	1
80	3.0225729467659552	1.4222222222222223	S. DenseNet	1
81	3.1724711575934346	1.44	S. DenseNet	1
82	3.222507043052533	1.4577777777777778	S. DenseNet	1
83	2.9976199776088004	1.4755555555555555	S. DenseNet	1
84	3.139858156710024	1.4933333333333334	S. DenseNet	1
85	3.1240631100055114	1.511111111111111	S. DenseNet	1
86	2.9938208207515196	1.528888888888889	S. DenseNet	1
87	2.9500006011739837	1.5466666666666666	S. DenseNet	1
88	3.047273783430321	1.5644444444444445	S. DenseNet	1
89	3.008817290848879	1.5822222222222222	S. DenseNet	1
90	2.82324777285948	1.6	S. DenseNet	1
91	2.8515541448866406	1.6177777777777778	S. DenseNet	1
92	2.8977853119930184	1.6355555555555557	S. DenseNet	1
93	2.9128192876310672	1.6533333333333333	S. DenseNet	1
94	2.9603753065285265	1.6711111111111112	S. DenseNet	1
95	3.004482022478097	1.6888888888888889	S. DenseNet	1
96	3.0046070098296958	1.7066666666666668	S. DenseNet	1
97	2.953951569769732	1.7244444444444444	S. DenseNet	1
98	3.0332182744654914	1.7422222222222221	S. DenseNet	1
99	2.940943363587238	1.76	S. DenseNet	1
100	2.878332745538563	1.7777777777777777	S. DenseNet	1
101	2.9936238050898787	1.7955555555555556	S. DenseNet	1
102	2.9620989994113827	1.8133333333333332	S. DenseNet	1
103	3.0133682688089025	1.8311111111111111	S. DenseNet	1
104	3.0031506743563896	1.8488888888888888	S. DenseNet	1
105	3.0754233066972785	1.8666666666666667	S. DenseNet	1
106	3.086927967901233	1.8844444444444444	S. DenseNet	1
107	3.0189918613288396	1.9022222222222223	S. DenseNet	1
108	3.127524522517334	1.92	S. DenseNet	1
109	3.0354809301294807	1.9377777777777778	S. DenseNet	1
110	3.0327881258823512	1.9555555555555555	S. DenseNet	1
111	2.9975649431565503	1.9733333333333334	S. DenseNet	1
112	3.0025112414235853	1.991111111111111	S. DenseNet	1
113	2.994440489232006	2.008888888888889	S. DenseNet	1
114	3.028157938992405	2.026666666666667	S. DenseNet	1
115	3.0341227932787986	2.0444444444444443	S. DenseNet	1
116	3.0211842431288556	2.062222222222222	S. DenseNet	1
117	3.0162179045094253	2.08	S. DenseNet	1
118	3.0298750807288144	2.097777777777778	S. DenseNet	1
119	3.0152510918057764	2.1155555555555554	S. DenseNet	1
120	3.022254194911159	2.1333333333333333	S. DenseNet	1
121	3.04329183393922	2.151111111111111	S. DenseNet	1
122	3.0266795280811536	2.168888888888889	S. DenseNet	1
123	3.047274702519122	2.1866666666666665	S. DenseNet	1
124	3.027293352725041	2.2044444444444444	S. DenseNet	1
125	3.0300604411273193	2.2222222222222223	S. DenseNet	1
126	3.0259152987929485	2.24	S. DenseNet	1
127	3.0173798912720615	2.2577777777777777	S. DenseNet	1
128	3.0361377233466897	2.2755555555555556	S. DenseNet	1
129	3.0125718385932347	2.2933333333333334	S. DenseNet	1
130	3.030228060370513	2.311111111111111	S. DenseNet	1
131	3.034374692575339	2.328888888888889	S. DenseNet	1
132	3.018588201252533	2.3466666666666667	S. DenseNet	1
133	3.0196087540419483	2.3644444444444446	S. DenseNet	1
134	3.01106991198543	2.382222222222222	S. DenseNet	1
135	3.0349188870229296	2.4	S. DenseNet	1
136	3.0258826698973027	2.417777777777778	S. DenseNet	1
137	3.0135286087314164	2.4355555555555557	S. DenseNet	1
138	3.0239278784173558	2.453333333333333	S. DenseNet	1
139	3.033175656929542	2.471111111111111	S. DenseNet	1
140	3.0206621920529697	2.488888888888889	S. DenseNet	1
141	3.017243361009247	2.506666666666667	S. DenseNet	1
142	3.050435879455918	2.5244444444444443	S. DenseNet	1
143	3.032747169822883	2.542222222222222	S. DenseNet	1
144	3.011975618807771	2.56	S. DenseNet	1
145	3.0174064835019885	2.577777777777778	S. DenseNet	1
146	3.033472737555581	2.5955555555555554	S. DenseNet	1
147	3.028068807728571	2.6133333333333333	S. DenseNet	1
148	3.0271833707662155	2.631111111111111	S. DenseNet	1
149	3.0384951037177492	2.648888888888889	S. DenseNet	1
150	3.0361205605501436	2.6666666666666665	S. DenseNet	1
0	14.767199794392713	0.0	S. DenseNet	2
1	13.280218252042113	0.017777777777777778	S. DenseNet	2
2	12.655487643809785	0.035555555555555556	S. DenseNet	2
3	9.233256685711014	0.05333333333333334	S. DenseNet	2
4	7.30641398273672	0.07111111111111111	S. DenseNet	2
5	6.591500957259411	0.08888888888888889	S. DenseNet	2
6	6.214009224420262	0.10666666666666667	S. DenseNet	2
7	5.531793972025014	0.12444444444444444	S. DenseNet	2
8	7.886477593635568	0.14222222222222222	S. DenseNet	2
9	3.9540856000309734	0.16	S. DenseNet	2
10	3.6607142167874156	0.17777777777777778	S. DenseNet	2
11	3.437725634107013	0.19555555555555557	S. DenseNet	2
12	3.6833634808067064	0.21333333333333335	S. DenseNet	2
13	4.284443631545019	0.2311111111111111	S. DenseNet	2
14	4.243396464466397	0.24888888888888888	S. DenseNet	2
15	3.3537016702970277	0.26666666666666666	S. DenseNet	2
16	3.5409989124793833	0.28444444444444444	S. DenseNet	2
17	6.439482018853536	0.3022222222222222	S. DenseNet	2
18	3.711477802859972	0.32	S. DenseNet	2
19	3.9569494074595735	0.3377777777777778	S. DenseNet	2
20	3.9091957937297424	0.35555555555555557	S. DenseNet	2
21	3.714822260580163	0.37333333333333335	S. DenseNet	2
22	4.060791787406761	0.39111111111111113	S. DenseNet	2
23	3.206846869374354	0.4088888888888889	S. DenseNet	2
24	3.187581383196039	0.4266666666666667	S. DenseNet	2
25	3.1459866886953716	0.4444444444444444	S. DenseNet	2
26	3.3716010979100024	0.4622222222222222	S. DenseNet	2
27	3.1564357341142744	0.48	S. DenseNet	2
28	3.40168814421861	0.49777777777777776	S. DenseNet	2
29	3.37209279511786	0.5155555555555555	S. DenseNet	2
30	3.2843671017717297	0.5333333333333333	S. DenseNet	2
31	3.58716586874908	0.5511111111111111	S. DenseNet	2
32	3.422871878128096	0.5688888888888889	S. DenseNet	2
33	2.9778459275044	0.5866666666666667	S. DenseNet	2
34	3.035631349442875	0.6044444444444445	S. DenseNet	2
35	2.9904860248732827	0.6222222222222222	S. DenseNet	2
36	2.8501061202673315	0.64	S. DenseNet	2
37	3.018514376468462	0.6577777777777778	S. DenseNet	2
38	2.747500550488363	0.6755555555555556	S. DenseNet	2
39	3.8231880258348143	0.6933333333333334	S. DenseNet	2
40	2.936896550078077	0.7111111111111111	S. DenseNet	2
41	3.2255871461803993	0.7288888888888889	S. DenseNet	2
42	3.217902183913934	0.7466666666666667	S. DenseNet	2
43	3.0515279012302314	0.7644444444444445	S. DenseNet	2
44	2.7733322929967676	0.7822222222222223	S. DenseNet	2
45	2.700729775013085	0.8	S. DenseNet	2
46	3.170845897568006	0.8177777777777778	S. DenseNet	2
47	2.7722860554433724	0.8355555555555556	S. DenseNet	2
48	3.610548274046335	0.8533333333333334	S. DenseNet	2
49	2.859588613799236	0.8711111111111111	S. DenseNet	2
50	2.851312894740788	0.8888888888888888	S. DenseNet	2
51	2.789258382604207	0.9066666666666666	S. DenseNet	2
52	2.559165166877788	0.9244444444444444	S. DenseNet	2
53	3.2017240745431605	0.9422222222222222	S. DenseNet	2
54	3.0345121751433375	0.96	S. DenseNet	2
55	2.8889124210719332	0.9777777777777777	S. DenseNet	2
56	3.0458919502015216	0.9955555555555555	S. DenseNet	2
57	2.8920363900676125	1.0133333333333334	S. DenseNet	2
58	2.968676816111888	1.031111111111111	S. DenseNet	2
59	2.7351633503695143	1.048888888888889	S. DenseNet	2
60	3.020046983189452	1.0666666666666667	S. DenseNet	2
61	3.076386580008107	1.0844444444444445	S. DenseNet	2
62	2.479305099131182	1.1022222222222222	S. DenseNet	2
63	2.379647652183532	1.12	S. DenseNet	2
64	2.6495950840014	1.1377777777777778	S. DenseNet	2
65	2.4431255459317076	1.1555555555555554	S. DenseNet	2
66	2.711685953431348	1.1733333333333333	S. DenseNet	2
67	2.5344476738205493	1.191111111111111	S. DenseNet	2
68	2.41562656836911	1.208888888888889	S. DenseNet	2
69	2.6813075711890293	1.2266666666666666	S. DenseNet	2
70	2.7445957536968466	1.2444444444444445	S. DenseNet	2
71	2.6502418118146807	1.2622222222222221	S. DenseNet	2
72	2.581672279246967	1.28	S. DenseNet	2
73	2.610376816849866	1.2977777777777777	S. DenseNet	2
74	2.8878979521345425	1.3155555555555556	S. DenseNet	2
75	2.787847313877633	1.3333333333333333	S. DenseNet	2
76	2.3962503092032996	1.3511111111111112	S. DenseNet	2
77	3.049231371136565	1.3688888888888888	S. DenseNet	2
78	3.1067691850952897	1.3866666666666667	S. DenseNet	2
79	2.524367461896522	1.4044444444444444	S. DenseNet	2
80	2.6348346108823613	1.4222222222222223	S. DenseNet	2
81	2.3617837035328066	1.44	S. DenseNet	2
82	2.2326142924880616	1.4577777777777778	S. DenseNet	2
83	2.193601857498269	1.4755555555555555	S. DenseNet	2
84	2.259896448813322	1.4933333333333334	S. DenseNet	2
85	2.3170694721440723	1.511111111111111	S. DenseNet	2
86	2.224432135816414	1.528888888888889	S. DenseNet	2
87	2.181268205472913	1.5466666666666666	S. DenseNet	2
88	2.2739220378550873	1.5644444444444445	S. DenseNet	2
89	2.1705127390503987	1.5822222222222222	S. DenseNet	2
90	2.269880401420271	1.6	S. DenseNet	2
91	2.2832120134493596	1.6177777777777778	S. DenseNet	2
92	2.2928563343437713	1.6355555555555557	S. DenseNet	2
93	2.246096212561459	1.6533333333333333	S. DenseNet	2
94	2.291515388720395	1.6711111111111112	S. DenseNet	2
95	2.297385422187694	1.6888888888888889	S. DenseNet	2
96	2.3267326895636105	1.7066666666666668	S. DenseNet	2
97	2.474742718349315	1.7244444444444444	S. DenseNet	2
98	2.352275215681138	1.7422222222222221	S. DenseNet	2
99	2.4107932465922994	1.76	S. DenseNet	2
100	2.4408136804980827	1.7777777777777777	S. DenseNet	2
101	2.4096693801762674	1.7955555555555556	S. DenseNet	2
102	2.3922375929870823	1.8133333333333332	S. DenseNet	2
103	2.342086205650476	1.8311111111111111	S. DenseNet	2
104	2.359536893803354	1.8488888888888888	S. DenseNet	2
105	2.319082658194003	1.8666666666666667	S. DenseNet	2
106	2.3709099919247985	1.8844444444444444	S. DenseNet	2
107	2.3325672265462574	1.9022222222222223	S. DenseNet	2
108	2.3129269967084953	1.92	S. DenseNet	2
109	2.282283642151451	1.9377777777777778	S. DenseNet	2
110	2.317730021900496	1.9555555555555555	S. DenseNet	2
111	2.3151655344994855	1.9733333333333334	S. DenseNet	2
112	2.3109012325669243	1.991111111111111	S. DenseNet	2
113	2.3040347204339096	2.008888888888889	S. DenseNet	2
114	2.339655219724909	2.026666666666667	S. DenseNet	2
115	2.3344743431301804	2.0444444444444443	S. DenseNet	2
116	2.3076530623607265	2.062222222222222	S. DenseNet	2
117	2.299310988960307	2.08	S. DenseNet	2
118	2.2905308469937258	2.097777777777778	S. DenseNet	2
119	2.302062125764257	2.1155555555555554	S. DenseNet	2
120	2.272558890284294	2.1333333333333333	S. DenseNet	2
121	2.2948585166918924	2.151111111111111	S. DenseNet	2
122	2.266690607919608	2.168888888888889	S. DenseNet	2
123	2.288572166499452	2.1866666666666665	S. DenseNet	2
124	2.2836176051009955	2.2044444444444444	S. DenseNet	2
125	2.2674626369524074	2.2222222222222223	S. DenseNet	2
126	2.2788977401875843	2.24	S. DenseNet	2
127	2.3018941720527817	2.2577777777777777	S. DenseNet	2
128	2.282883174894385	2.2755555555555556	S. DenseNet	2
129	2.2921956245628796	2.2933333333333334	S. DenseNet	2
130	2.2930636596064162	2.311111111111111	S. DenseNet	2
131	2.2852057789364726	2.328888888888889	S. DenseNet	2
132	2.2825958710450873	2.3466666666666667	S. DenseNet	2
133	2.2698282954305653	2.3644444444444446	S. DenseNet	2
134	2.270332402596038	2.382222222222222	S. DenseNet	2
135	2.2692564235510426	2.4	S. DenseNet	2
136	2.266210753285799	2.417777777777778	S. DenseNet	2
137	2.268295190349191	2.4355555555555557	S. DenseNet	2
138	2.2735393151827834	2.453333333333333	S. DenseNet	2
139	2.2708873853278355	2.471111111111111	S. DenseNet	2
140	2.2700712849071767	2.488888888888889	S. DenseNet	2
141	2.2716337250213794	2.506666666666667	S. DenseNet	2
142	2.273758687614767	2.5244444444444443	S. DenseNet	2
143	2.2696500262560586	2.542222222222222	S. DenseNet	2
144	2.2595117288101227	2.56	S. DenseNet	2
145	2.266481388652677	2.577777777777778	S. DenseNet	2
146	2.265398482619987	2.5955555555555554	S. DenseNet	2
147	2.269098093723974	2.6133333333333333	S. DenseNet	2
148	2.268813068466569	2.631111111111111	S. DenseNet	2
149	2.263159137479207	2.648888888888889	S. DenseNet	2
150	2.267439070563583	2.6666666666666665	S. DenseNet	2
151	2.2788797747087886	2.6844444444444444	S. DenseNet	2
152	2.27145044080311	2.7022222222222223	S. DenseNet	2
153	2.2742189643346578	2.72	S. DenseNet	2
154	2.273256409133318	2.7377777777777776	S. DenseNet	2
155	2.274250198266293	2.7555555555555555	S. DenseNet	2
156	2.2766638059823463	2.7733333333333334	S. DenseNet	2
157	2.2774512481360003	2.7911111111111113	S. DenseNet	2
158	2.274223735756905	2.8088888888888888	S. DenseNet	2
159	2.2740945358266544	2.8266666666666667	S. DenseNet	2
160	2.277103023698403	2.8444444444444446	S. DenseNet	2
161	2.276203980541546	2.862222222222222	S. DenseNet	2
162	2.274980864746917	2.88	S. DenseNet	2
163	2.275159244940925	2.897777777777778	S. DenseNet	2
164	2.276124466217334	2.9155555555555557	S. DenseNet	2
165	2.278596803024017	2.933333333333333	S. DenseNet	2
166	2.2777153722650896	2.951111111111111	S. DenseNet	2
167	2.276410216246765	2.968888888888889	S. DenseNet	2
168	2.2746148535035386	2.986666666666667	S. DenseNet	2
169	2.2725840014434135	3.0044444444444443	S. DenseNet	2
170	2.2709222412539174	3.022222222222222	S. DenseNet	2
171	2.271711288450345	3.04	S. DenseNet	2
172	2.274362360298856	3.057777777777778	S. DenseNet	2
173	2.275396266600474	3.0755555555555554	S. DenseNet	2
174	2.2715313918458278	3.0933333333333333	S. DenseNet	2
175	2.2734182918433525	3.111111111111111	S. DenseNet	2
176	2.2657033139201195	3.128888888888889	S. DenseNet	2
177	2.2649774063644235	3.1466666666666665	S. DenseNet	2
178	2.2643279294100496	3.1644444444444444	S. DenseNet	2
179	2.2614534067599315	3.1822222222222223	S. DenseNet	2
180	2.260977944418946	3.2	S. DenseNet	2
181	2.2629133437751143	3.2177777777777776	S. DenseNet	2
182	2.2621349670374316	3.2355555555555555	S. DenseNet	2
183	2.2611317788511256	3.2533333333333334	S. DenseNet	2
184	2.2596442049747942	3.2711111111111113	S. DenseNet	2
185	2.2601217181169733	3.2888888888888888	S. DenseNet	2
186	2.2619445011217407	3.3066666666666666	S. DenseNet	2
187	2.2623140616276554	3.3244444444444445	S. DenseNet	2
188	2.26261125880699	3.3422222222222224	S. DenseNet	2
189	2.2626503209227273	3.36	S. DenseNet	2
190	2.263285521330936	3.3777777777777778	S. DenseNet	2
191	2.263145769078643	3.3955555555555557	S. DenseNet	2
192	2.2632027605059015	3.4133333333333336	S. DenseNet	2
193	2.2630728787958594	3.431111111111111	S. DenseNet	2
194	2.2627994729577487	3.448888888888889	S. DenseNet	2
195	2.262908140226074	3.466666666666667	S. DenseNet	2
196	2.262930646414931	3.4844444444444442	S. DenseNet	2
197	2.2628807663890096	3.502222222222222	S. DenseNet	2
198	2.26303717486755	3.52	S. DenseNet	2
199	2.262982394304724	3.537777777777778	S. DenseNet	2
200	2.262944783434648	3.5555555555555554	S. DenseNet	2
201	2.2628801681704194	3.5733333333333333	S. DenseNet	2
202	2.2628988245310957	3.591111111111111	S. DenseNet	2
203	2.262912900977962	3.608888888888889	S. DenseNet	2
204	2.2628873450198417	3.6266666666666665	S. DenseNet	2
205	2.262886022725694	3.6444444444444444	S. DenseNet	2
206	2.26282216992649	3.6622222222222223	S. DenseNet	2
207	2.2628707174581018	3.68	S. DenseNet	2
208	2.2628854616233816	3.6977777777777776	S. DenseNet	2
209	2.2629343445215486	3.7155555555555555	S. DenseNet	2
210	2.2629348002911143	3.7333333333333334	S. DenseNet	2
211	2.262904174798842	3.7511111111111113	S. DenseNet	2
212	2.2628448870395905	3.7688888888888887	S. DenseNet	2
213	2.262847416259843	3.7866666666666666	S. DenseNet	2
214	2.2629332490391776	3.8044444444444445	S. DenseNet	2
215	2.2628218653098635	3.8222222222222224	S. DenseNet	2
216	2.262897703738341	3.84	S. DenseNet	2
217	2.262888885497836	3.8577777777777778	S. DenseNet	2
218	2.2628329012408304	3.8755555555555556	S. DenseNet	2
219	2.2628071298358607	3.8933333333333335	S. DenseNet	2
220	2.2628500224388097	3.911111111111111	S. DenseNet	2
0	13.487818210763836	0.0	S. DenseNet	3
1	10.50002850694166	0.017777777777777778	S. DenseNet	3
2	9.324693617294178	0.035555555555555556	S. DenseNet	3
3	8.629173484815011	0.05333333333333334	S. DenseNet	3
4	6.333500416773277	0.07111111111111111	S. DenseNet	3
5	5.87803491566361	0.08888888888888889	S. DenseNet	3
6	5.002621321731268	0.10666666666666667	S. DenseNet	3
7	5.20709762102031	0.12444444444444444	S. DenseNet	3
8	6.844336888589903	0.14222222222222222	S. DenseNet	3
9	5.049631146612762	0.16	S. DenseNet	3
10	4.013013819210359	0.17777777777777778	S. DenseNet	3
11	3.599032216474794	0.19555555555555557	S. DenseNet	3
12	4.230425734037517	0.21333333333333335	S. DenseNet	3
13	4.469706937844627	0.2311111111111111	S. DenseNet	3
14	4.019412438944141	0.24888888888888888	S. DenseNet	3
15	4.715553212347175	0.26666666666666666	S. DenseNet	3
16	3.9305259889387423	0.28444444444444444	S. DenseNet	3
17	3.5419818474567055	0.3022222222222222	S. DenseNet	3
18	3.504882184257723	0.32	S. DenseNet	3
19	2.9509350953270683	0.3377777777777778	S. DenseNet	3
20	3.3540920688451723	0.35555555555555557	S. DenseNet	3
21	2.9683627087661577	0.37333333333333335	S. DenseNet	3
22	2.7522426646275298	0.39111111111111113	S. DenseNet	3
23	3.4271042381990378	0.4088888888888889	S. DenseNet	3
24	3.417310543542072	0.4266666666666667	S. DenseNet	3
25	3.8387533895570733	0.4444444444444444	S. DenseNet	3
26	3.477230395100889	0.4622222222222222	S. DenseNet	3
27	2.994769311284123	0.48	S. DenseNet	3
28	3.2428812036239214	0.49777777777777776	S. DenseNet	3
29	3.1512085492915194	0.5155555555555555	S. DenseNet	3
30	3.093022585295542	0.5333333333333333	S. DenseNet	3
31	3.4852562269860634	0.5511111111111111	S. DenseNet	3
32	3.691447812430561	0.5688888888888889	S. DenseNet	3
33	3.2224617284230943	0.5866666666666667	S. DenseNet	3
34	3.4641910204241766	0.6044444444444445	S. DenseNet	3
35	2.575823214072497	0.6222222222222222	S. DenseNet	3
36	2.547575933276462	0.64	S. DenseNet	3
37	2.74926825519299	0.6577777777777778	S. DenseNet	3
38	2.6708646170146286	0.6755555555555556	S. DenseNet	3
39	2.5910984272061306	0.6933333333333334	S. DenseNet	3
40	2.328454316197768	0.7111111111111111	S. DenseNet	3
41	2.349870812785156	0.7288888888888889	S. DenseNet	3
42	2.566560434920506	0.7466666666666667	S. DenseNet	3
43	2.6399681396831123	0.7644444444444445	S. DenseNet	3
44	2.7048614039157672	0.7822222222222223	S. DenseNet	3
45	2.5030499333314284	0.8	S. DenseNet	3
46	2.503642279193012	0.8177777777777778	S. DenseNet	3
47	2.6744410773613057	0.8355555555555556	S. DenseNet	3
48	2.6409635214895983	0.8533333333333334	S. DenseNet	3
49	2.596699807189018	0.8711111111111111	S. DenseNet	3
50	2.4684991898317166	0.8888888888888888	S. DenseNet	3
51	2.5209744320357204	0.9066666666666666	S. DenseNet	3
52	2.5467522019139976	0.9244444444444444	S. DenseNet	3
53	2.392302856536243	0.9422222222222222	S. DenseNet	3
54	2.397216890739056	0.96	S. DenseNet	3
55	2.3541579416815326	0.9777777777777777	S. DenseNet	3
56	2.47754453183133	0.9955555555555555	S. DenseNet	3
57	2.4060716034029688	1.0133333333333334	S. DenseNet	3
58	2.452510013026097	1.031111111111111	S. DenseNet	3
59	2.4752875093956748	1.048888888888889	S. DenseNet	3
60	2.3960885003427337	1.0666666666666667	S. DenseNet	3
61	2.4770793481462854	1.0844444444444445	S. DenseNet	3
62	2.378446281190004	1.1022222222222222	S. DenseNet	3
63	2.4179613264727964	1.12	S. DenseNet	3
64	2.4696855216202116	1.1377777777777778	S. DenseNet	3
65	2.3801198218619235	1.1555555555555554	S. DenseNet	3
66	2.4127190666228846	1.1733333333333333	S. DenseNet	3
67	2.458687604148292	1.191111111111111	S. DenseNet	3
68	2.4161547282211466	1.208888888888889	S. DenseNet	3
69	2.4683131418304614	1.2266666666666666	S. DenseNet	3
70	2.4292917508901617	1.2444444444444445	S. DenseNet	3
71	2.450607032258491	1.2622222222222221	S. DenseNet	3
72	2.439911806716173	1.28	S. DenseNet	3
73	2.44520378443476	1.2977777777777777	S. DenseNet	3
74	2.463201410584223	1.3155555555555556	S. DenseNet	3
75	2.4224936622112128	1.3333333333333333	S. DenseNet	3
76	2.426459459789093	1.3511111111111112	S. DenseNet	3
77	2.4163523416416655	1.3688888888888888	S. DenseNet	3
78	2.418677430649344	1.3866666666666667	S. DenseNet	3
79	2.4169911761624534	1.4044444444444444	S. DenseNet	3
80	2.445797943105714	1.4222222222222223	S. DenseNet	3
81	2.446145537756077	1.44	S. DenseNet	3
82	2.4565815525594457	1.4577777777777778	S. DenseNet	3
83	2.456964660075664	1.4755555555555555	S. DenseNet	3
84	2.4425698419549895	1.4933333333333334	S. DenseNet	3
85	2.4504055420897672	1.511111111111111	S. DenseNet	3
86	2.4394647807126644	1.528888888888889	S. DenseNet	3
87	2.43942934295765	1.5466666666666666	S. DenseNet	3
88	2.438946259583525	1.5644444444444445	S. DenseNet	3
89	2.43792921552741	1.5822222222222222	S. DenseNet	3
90	2.437561451804952	1.6	S. DenseNet	3
91	2.4344347841309286	1.6177777777777778	S. DenseNet	3
92	2.434298709377961	1.6355555555555557	S. DenseNet	3
93	2.434138167308175	1.6533333333333333	S. DenseNet	3
94	2.4329722086015537	1.6711111111111112	S. DenseNet	3
95	2.4333568344214815	1.6888888888888889	S. DenseNet	3
96	2.4331379782126246	1.7066666666666668	S. DenseNet	3
97	2.43320163235149	1.7244444444444444	S. DenseNet	3
98	2.4330419714491853	1.7422222222222221	S. DenseNet	3
99	2.433003406224807	1.76	S. DenseNet	3
100	2.4326581597361607	1.7777777777777777	S. DenseNet	3
101	2.4328756300870857	1.7955555555555556	S. DenseNet	3
102	2.433366085930519	1.8133333333333332	S. DenseNet	3
103	2.433246036099604	1.8311111111111111	S. DenseNet	3
104	2.433120372833974	1.8488888888888888	S. DenseNet	3
105	2.432847817345412	1.8666666666666667	S. DenseNet	3
106	2.432848763019395	1.8844444444444444	S. DenseNet	3
107	2.432836166374927	1.9022222222222223	S. DenseNet	3
108	2.4328320474994847	1.92	S. DenseNet	3
109	2.432829342360065	1.9377777777777778	S. DenseNet	3
110	2.432940641736164	1.9555555555555555	S. DenseNet	3
111	2.4329669575728583	1.9733333333333334	S. DenseNet	3
112	2.432995488741551	1.991111111111111	S. DenseNet	3
113	2.4329554530959663	2.008888888888889	S. DenseNet	3
114	2.432939664756223	2.026666666666667	S. DenseNet	3
115	2.43282509195884	2.0444444444444443	S. DenseNet	3
0	20.125337034329952	0.0	S. DenseNet	4
1	10.073752952373587	0.017777777777777778	S. DenseNet	4
2	8.98080313265999	0.035555555555555556	S. DenseNet	4
3	9.024406458457461	0.05333333333333334	S. DenseNet	4
4	5.460365363159091	0.07111111111111111	S. DenseNet	4
5	7.956443004648931	0.08888888888888889	S. DenseNet	4
6	4.838842243593967	0.10666666666666667	S. DenseNet	4
7	5.175685333362353	0.12444444444444444	S. DenseNet	4
8	4.755745821258441	0.14222222222222222	S. DenseNet	4
9	4.035688475664404	0.16	S. DenseNet	4
10	5.15035708650835	0.17777777777777778	S. DenseNet	4
11	4.060849542748864	0.19555555555555557	S. DenseNet	4
12	4.392188182852123	0.21333333333333335	S. DenseNet	4
13	3.7037327549265853	0.2311111111111111	S. DenseNet	4
14	4.224316842232369	0.24888888888888888	S. DenseNet	4
15	3.0548954326991264	0.26666666666666666	S. DenseNet	4
16	3.9494478921221368	0.28444444444444444	S. DenseNet	4
17	3.7521668587597663	0.3022222222222222	S. DenseNet	4
18	3.402165380144274	0.32	S. DenseNet	4
19	2.9968490061089876	0.3377777777777778	S. DenseNet	4
20	3.5944335792121964	0.35555555555555557	S. DenseNet	4
21	4.932659462151529	0.37333333333333335	S. DenseNet	4
22	3.148608387230503	0.39111111111111113	S. DenseNet	4
23	2.8893938784286615	0.4088888888888889	S. DenseNet	4
24	3.736459633122282	0.4266666666666667	S. DenseNet	4
25	3.5932093004944363	0.4444444444444444	S. DenseNet	4
26	2.941017311183575	0.4622222222222222	S. DenseNet	4
27	3.5405609802744857	0.48	S. DenseNet	4
28	2.727561473393602	0.49777777777777776	S. DenseNet	4
29	2.6553373974062286	0.5155555555555555	S. DenseNet	4
30	3.1371306119367475	0.5333333333333333	S. DenseNet	4
31	3.1682350415215894	0.5511111111111111	S. DenseNet	4
32	2.9582200307572695	0.5688888888888889	S. DenseNet	4
33	3.3380668230842665	0.5866666666666667	S. DenseNet	4
34	3.6459898306522844	0.6044444444444445	S. DenseNet	4
35	2.9419377366973047	0.6222222222222222	S. DenseNet	4
36	2.976869587850819	0.64	S. DenseNet	4
37	2.666376646519228	0.6577777777777778	S. DenseNet	4
38	2.456330030857791	0.6755555555555556	S. DenseNet	4
39	3.036413527764063	0.6933333333333334	S. DenseNet	4
40	2.9443308942215376	0.7111111111111111	S. DenseNet	4
41	4.062458152836858	0.7288888888888889	S. DenseNet	4
42	2.8824823995397595	0.7466666666666667	S. DenseNet	4
43	2.762946448402528	0.7644444444444445	S. DenseNet	4
44	2.6386986653495113	0.7822222222222223	S. DenseNet	4
45	2.862817103377654	0.8	S. DenseNet	4
46	2.9200091390194736	0.8177777777777778	S. DenseNet	4
47	2.956313763619989	0.8355555555555556	S. DenseNet	4
48	2.4250302722394035	0.8533333333333334	S. DenseNet	4
49	3.587729519166022	0.8711111111111111	S. DenseNet	4
50	2.8665239139919545	0.8888888888888888	S. DenseNet	4
51	2.4719819574256294	0.9066666666666666	S. DenseNet	4
52	2.784426133947221	0.9244444444444444	S. DenseNet	4
53	2.4942525259755874	0.9422222222222222	S. DenseNet	4
54	2.4535411789942367	0.96	S. DenseNet	4
55	3.3583266117067145	0.9777777777777777	S. DenseNet	4
56	3.3605470824658994	0.9955555555555555	S. DenseNet	4
57	2.4319666128929125	1.0133333333333334	S. DenseNet	4
58	2.4032864652113295	1.031111111111111	S. DenseNet	4
59	2.4847309288191473	1.048888888888889	S. DenseNet	4
60	2.632328880309291	1.0666666666666667	S. DenseNet	4
61	2.3417989420433947	1.0844444444444445	S. DenseNet	4
62	2.5421477693424612	1.1022222222222222	S. DenseNet	4
63	2.348973228254151	1.12	S. DenseNet	4
64	3.206767851659575	1.1377777777777778	S. DenseNet	4
65	2.601080902211674	1.1555555555555554	S. DenseNet	4
66	2.808600058640006	1.1733333333333333	S. DenseNet	4
67	2.8174930670969878	1.191111111111111	S. DenseNet	4
68	2.265394715198515	1.208888888888889	S. DenseNet	4
69	2.362813298330878	1.2266666666666666	S. DenseNet	4
70	2.3515398054975183	1.2444444444444445	S. DenseNet	4
71	2.3652261514204946	1.2622222222222221	S. DenseNet	4
72	3.1489322266220103	1.28	S. DenseNet	4
73	2.491079535012394	1.2977777777777777	S. DenseNet	4
74	2.27931593802007	1.3155555555555556	S. DenseNet	4
75	2.459419656686151	1.3333333333333333	S. DenseNet	4
76	2.9274881363148024	1.3511111111111112	S. DenseNet	4
77	2.288317476289211	1.3688888888888888	S. DenseNet	4
78	2.520512069086454	1.3866666666666667	S. DenseNet	4
79	2.476864988199564	1.4044444444444444	S. DenseNet	4
80	2.7720379191367206	1.4222222222222223	S. DenseNet	4
81	2.3744986452295307	1.44	S. DenseNet	4
82	2.9009629916546222	1.4577777777777778	S. DenseNet	4
83	2.594435791476679	1.4755555555555555	S. DenseNet	4
84	2.499762277766754	1.4933333333333334	S. DenseNet	4
85	2.5239313346005305	1.511111111111111	S. DenseNet	4
86	2.531887837498008	1.528888888888889	S. DenseNet	4
87	2.430182436803736	1.5466666666666666	S. DenseNet	4
88	2.728782621375922	1.5644444444444445	S. DenseNet	4
89	2.498620587674548	1.5822222222222222	S. DenseNet	4
90	2.963565502743109	1.6	S. DenseNet	4
91	2.887488157965211	1.6177777777777778	S. DenseNet	4
92	3.2119609176719846	1.6355555555555557	S. DenseNet	4
93	2.297216258393802	1.6533333333333333	S. DenseNet	4
94	2.6100099140388324	1.6711111111111112	S. DenseNet	4
95	2.366189935575225	1.6888888888888889	S. DenseNet	4
96	2.460002231246947	1.7066666666666668	S. DenseNet	4
97	2.468208436762584	1.7244444444444444	S. DenseNet	4
98	2.397923607660108	1.7422222222222221	S. DenseNet	4
99	2.3731654270907843	1.76	S. DenseNet	4
100	2.3124725179917407	1.7777777777777777	S. DenseNet	4
101	2.401913843555208	1.7955555555555556	S. DenseNet	4
102	2.510566423226241	1.8133333333333332	S. DenseNet	4
103	2.164422771865135	1.8311111111111111	S. DenseNet	4
104	2.430908733101757	1.8488888888888888	S. DenseNet	4
105	2.3825941164125384	1.8666666666666667	S. DenseNet	4
106	2.4506832415622304	1.8844444444444444	S. DenseNet	4
107	2.3472663829535207	1.9022222222222223	S. DenseNet	4
108	2.19222158492476	1.92	S. DenseNet	4
109	2.1326465457676314	1.9377777777777778	S. DenseNet	4
110	2.2717531595420897	1.9555555555555555	S. DenseNet	4
111	2.2017812880610603	1.9733333333333334	S. DenseNet	4
112	2.3894711279509346	1.991111111111111	S. DenseNet	4
113	2.3683415420556666	2.008888888888889	S. DenseNet	4
114	2.202419458898519	2.026666666666667	S. DenseNet	4
115	2.1339250707698056	2.0444444444444443	S. DenseNet	4
116	2.2862760714025776	2.062222222222222	S. DenseNet	4
117	2.3079735356335673	2.08	S. DenseNet	4
118	2.172698071278133	2.097777777777778	S. DenseNet	4
119	2.175253304407094	2.1155555555555554	S. DenseNet	4
120	2.170127044464114	2.1333333333333333	S. DenseNet	4
121	2.1632147959199095	2.151111111111111	S. DenseNet	4
122	2.034640678001316	2.168888888888889	S. DenseNet	4
123	2.030285776438212	2.1866666666666665	S. DenseNet	4
124	2.1634080765301387	2.2044444444444444	S. DenseNet	4
125	2.2702320131533518	2.2222222222222223	S. DenseNet	4
126	2.2349285647720607	2.24	S. DenseNet	4
127	2.259102250341198	2.2577777777777777	S. DenseNet	4
128	2.086426785540756	2.2755555555555556	S. DenseNet	4
129	2.169471145434002	2.2933333333333334	S. DenseNet	4
130	2.129222975895779	2.311111111111111	S. DenseNet	4
131	2.0559544141790584	2.328888888888889	S. DenseNet	4
132	2.206040084094184	2.3466666666666667	S. DenseNet	4
133	2.1243493179587545	2.3644444444444446	S. DenseNet	4
134	2.119323507479805	2.382222222222222	S. DenseNet	4
135	2.143509503576736	2.4	S. DenseNet	4
136	2.2188338642260876	2.417777777777778	S. DenseNet	4
137	2.2481015698333953	2.4355555555555557	S. DenseNet	4
138	2.2518096152191642	2.453333333333333	S. DenseNet	4
139	2.239610353987156	2.471111111111111	S. DenseNet	4
140	2.1895748948900975	2.488888888888889	S. DenseNet	4
141	2.2462052976187854	2.506666666666667	S. DenseNet	4
142	2.245370643182012	2.5244444444444443	S. DenseNet	4
143	2.2378661966743323	2.542222222222222	S. DenseNet	4
144	2.229833816011741	2.56	S. DenseNet	4
145	2.2184580669232368	2.577777777777778	S. DenseNet	4
146	2.223144575452306	2.5955555555555554	S. DenseNet	4
147	2.2203957842392654	2.6133333333333333	S. DenseNet	4
148	2.214852144517552	2.631111111111111	S. DenseNet	4
149	2.2077132999051683	2.648888888888889	S. DenseNet	4
150	2.224381364871779	2.6666666666666665	S. DenseNet	4
151	2.235150154503098	2.6844444444444444	S. DenseNet	4
152	2.222525648192309	2.7022222222222223	S. DenseNet	4
153	2.2170811339971337	2.72	S. DenseNet	4
154	2.2184317352691347	2.7377777777777776	S. DenseNet	4
155	2.2176787301456913	2.7555555555555555	S. DenseNet	4
156	2.218111471921785	2.7733333333333334	S. DenseNet	4
157	2.2164199081249945	2.7911111111111113	S. DenseNet	4
158	2.220753103776616	2.8088888888888888	S. DenseNet	4
159	2.2176414732947634	2.8266666666666667	S. DenseNet	4
160	2.2176098349947475	2.8444444444444446	S. DenseNet	4
161	2.2175669619424188	2.862222222222222	S. DenseNet	4
162	2.217619776696808	2.88	S. DenseNet	4
163	2.2175618618855295	2.897777777777778	S. DenseNet	4
164	2.21775715816949	2.9155555555555557	S. DenseNet	4
165	2.2175712711365465	2.933333333333333	S. DenseNet	4
166	2.2175713901976426	2.951111111111111	S. DenseNet	4
167	2.217555749771221	2.968888888888889	S. DenseNet	4
168	2.2174512078906243	2.986666666666667	S. DenseNet	4
169	2.2175182618122777	3.0044444444444443	S. DenseNet	4
170	2.2176326410557183	3.022222222222222	S. DenseNet	4
171	2.217635491827118	3.04	S. DenseNet	4
172	2.217710868677509	3.057777777777778	S. DenseNet	4
173	2.2176021011729743	3.0755555555555554	S. DenseNet	4
174	2.217647617217175	3.0933333333333333	S. DenseNet	4
175	2.217677081733401	3.111111111111111	S. DenseNet	4
176	2.217670584962198	3.128888888888889	S. DenseNet	4
177	2.2176913685952067	3.1466666666666665	S. DenseNet	4
178	2.2097636753599046	3.1644444444444444	S. DenseNet	4
179	2.2176801934218737	3.1822222222222223	S. DenseNet	4
180	2.2175966663921227	3.2	S. DenseNet	4
181	2.2176335461086447	3.2177777777777776	S. DenseNet	4
0	14.301618678739269	0.0	S. DenseNet	5
1	9.70505273724633	0.017777777777777778	S. DenseNet	5
2	11.12358371226839	0.035555555555555556	S. DenseNet	5
3	10.573171160501989	0.05333333333333334	S. DenseNet	5
4	10.590123097419777	0.07111111111111111	S. DenseNet	5
5	6.875239985896407	0.08888888888888889	S. DenseNet	5
6	5.720679393660502	0.10666666666666667	S. DenseNet	5
7	4.304320138517812	0.12444444444444444	S. DenseNet	5
8	5.221654931308904	0.14222222222222222	S. DenseNet	5
9	4.541840155029177	0.16	S. DenseNet	5
10	4.62020436335644	0.17777777777777778	S. DenseNet	5
11	4.3320569125692305	0.19555555555555557	S. DenseNet	5
12	3.1742112232323243	0.21333333333333335	S. DenseNet	5
13	4.138815550141644	0.2311111111111111	S. DenseNet	5
14	2.9192284286519414	0.24888888888888888	S. DenseNet	5
15	3.595635394347079	0.26666666666666666	S. DenseNet	5
16	2.8190209198129006	0.28444444444444444	S. DenseNet	5
17	4.373933875819231	0.3022222222222222	S. DenseNet	5
18	2.967930212080019	0.32	S. DenseNet	5
19	3.547816215691482	0.3377777777777778	S. DenseNet	5
20	2.851936786760428	0.35555555555555557	S. DenseNet	5
21	4.1110619068001055	0.37333333333333335	S. DenseNet	5
22	3.5321470214732336	0.39111111111111113	S. DenseNet	5
23	3.7164062806589238	0.4088888888888889	S. DenseNet	5
24	3.756866696737428	0.4266666666666667	S. DenseNet	5
25	3.3033486521519158	0.4444444444444444	S. DenseNet	5
26	2.554094388605074	0.4622222222222222	S. DenseNet	5
27	4.188039970184733	0.48	S. DenseNet	5
28	2.5635187839084015	0.49777777777777776	S. DenseNet	5
29	2.6325708574163453	0.5155555555555555	S. DenseNet	5
30	2.919373942401062	0.5333333333333333	S. DenseNet	5
31	2.8513078899853546	0.5511111111111111	S. DenseNet	5
32	2.8130748553705907	0.5688888888888889	S. DenseNet	5
33	3.3219441540899903	0.5866666666666667	S. DenseNet	5
34	2.9672272721350903	0.6044444444444445	S. DenseNet	5
35	2.766483813868993	0.6222222222222222	S. DenseNet	5
36	2.845903318311187	0.64	S. DenseNet	5
37	2.6176610140137084	0.6577777777777778	S. DenseNet	5
38	2.6845370080779074	0.6755555555555556	S. DenseNet	5
39	2.475860303192592	0.6933333333333334	S. DenseNet	5
40	2.7626699529199734	0.7111111111111111	S. DenseNet	5
41	2.4342182471319718	0.7288888888888889	S. DenseNet	5
42	2.285074462014185	0.7466666666666667	S. DenseNet	5
43	2.4563921393504082	0.7644444444444445	S. DenseNet	5
44	2.4180752451094527	0.7822222222222223	S. DenseNet	5
45	2.457643043579853	0.8	S. DenseNet	5
46	2.341375013091133	0.8177777777777778	S. DenseNet	5
47	2.2574015552991313	0.8355555555555556	S. DenseNet	5
48	2.38545029706134	0.8533333333333334	S. DenseNet	5
49	2.2536375266060085	0.8711111111111111	S. DenseNet	5
50	2.417432821023282	0.8888888888888888	S. DenseNet	5
51	2.235137652789107	0.9066666666666666	S. DenseNet	5
52	2.518556084049056	0.9244444444444444	S. DenseNet	5
53	2.300016958453366	0.9422222222222222	S. DenseNet	5
54	2.5298447595905382	0.96	S. DenseNet	5
55	2.3571601892896425	0.9777777777777777	S. DenseNet	5
56	2.311925668712634	0.9955555555555555	S. DenseNet	5
57	2.331787218374553	1.0133333333333334	S. DenseNet	5
58	2.593345381552922	1.031111111111111	S. DenseNet	5
59	2.2408776779684243	1.048888888888889	S. DenseNet	5
60	2.361006140040318	1.0666666666666667	S. DenseNet	5
61	2.3239049760681776	1.0844444444444445	S. DenseNet	5
62	2.219715514322493	1.1022222222222222	S. DenseNet	5
63	2.379706255491859	1.12	S. DenseNet	5
64	2.1849753187555154	1.1377777777777778	S. DenseNet	5
65	2.1624439361776315	1.1555555555555554	S. DenseNet	5
66	2.199438481387067	1.1733333333333333	S. DenseNet	5
67	2.3420513199478274	1.191111111111111	S. DenseNet	5
68	2.1082082952861603	1.208888888888889	S. DenseNet	5
69	2.095887273660952	1.2266666666666666	S. DenseNet	5
70	2.413850531401699	1.2444444444444445	S. DenseNet	5
71	2.1315770622318366	1.2622222222222221	S. DenseNet	5
72	2.226273436616849	1.28	S. DenseNet	5
73	2.57534546307991	1.2977777777777777	S. DenseNet	5
74	2.3341113529064046	1.3155555555555556	S. DenseNet	5
75	2.4921134020009763	1.3333333333333333	S. DenseNet	5
76	2.407572182080596	1.3511111111111112	S. DenseNet	5
77	2.356827913481402	1.3688888888888888	S. DenseNet	5
78	2.383767089140635	1.3866666666666667	S. DenseNet	5
79	2.4049889836048206	1.4044444444444444	S. DenseNet	5
80	2.3784890981619142	1.4222222222222223	S. DenseNet	5
81	2.197930677755074	1.44	S. DenseNet	5
82	2.3189300633238585	1.4577777777777778	S. DenseNet	5
83	2.1155214203889785	1.4755555555555555	S. DenseNet	5
84	2.083671029325191	1.4933333333333334	S. DenseNet	5
85	2.2337543139559655	1.511111111111111	S. DenseNet	5
86	2.280969540150188	1.528888888888889	S. DenseNet	5
87	2.11496232830965	1.5466666666666666	S. DenseNet	5
88	2.23136420066725	1.5644444444444445	S. DenseNet	5
89	2.186152094744641	1.5822222222222222	S. DenseNet	5
90	2.1943336945822645	1.6	S. DenseNet	5
91	2.1448078487878206	1.6177777777777778	S. DenseNet	5
92	2.1792014889625775	1.6355555555555557	S. DenseNet	5
93	2.1141574401668164	1.6533333333333333	S. DenseNet	5
94	2.0703072186283022	1.6711111111111112	S. DenseNet	5
95	2.129128090287516	1.6888888888888889	S. DenseNet	5
96	2.0669317627809374	1.7066666666666668	S. DenseNet	5
97	2.0853586235348884	1.7244444444444444	S. DenseNet	5
98	2.1009557522876054	1.7422222222222221	S. DenseNet	5
99	2.098811125445358	1.76	S. DenseNet	5
100	2.063830756842519	1.7777777777777777	S. DenseNet	5
101	2.0856958187671686	1.7955555555555556	S. DenseNet	5
102	2.0519745616437386	1.8133333333333332	S. DenseNet	5
103	2.07671318665563	1.8311111111111111	S. DenseNet	5
104	2.0699333883477085	1.8488888888888888	S. DenseNet	5
105	2.062957550946144	1.8666666666666667	S. DenseNet	5
106	2.0699258723776137	1.8844444444444444	S. DenseNet	5
107	2.08497724009485	1.9022222222222223	S. DenseNet	5
108	2.1012168869727192	1.92	S. DenseNet	5
109	2.1019934859441376	1.9377777777777778	S. DenseNet	5
110	2.1007883449723295	1.9555555555555555	S. DenseNet	5
111	2.0694583786028997	1.9733333333333334	S. DenseNet	5
112	2.0839935028560914	1.991111111111111	S. DenseNet	5
113	2.062361747351127	2.008888888888889	S. DenseNet	5
114	2.062733802076516	2.026666666666667	S. DenseNet	5
115	2.0596768162435675	2.0444444444444443	S. DenseNet	5
116	2.0594363298937455	2.062222222222222	S. DenseNet	5
117	2.0539028516927815	2.08	S. DenseNet	5
118	2.0744376663118334	2.097777777777778	S. DenseNet	5
119	2.0743268718437124	2.1155555555555554	S. DenseNet	5
120	2.074583562987262	2.1333333333333333	S. DenseNet	5
121	2.062120637368034	2.151111111111111	S. DenseNet	5
122	2.062430757803861	2.168888888888889	S. DenseNet	5
123	2.068035273713564	2.1866666666666665	S. DenseNet	5
124	2.067919048873326	2.2044444444444444	S. DenseNet	5
125	2.068024858782886	2.2222222222222223	S. DenseNet	5
126	2.068005213367285	2.24	S. DenseNet	5
127	2.074592420160228	2.2577777777777777	S. DenseNet	5
128	2.0745712179843783	2.2755555555555556	S. DenseNet	5
129	2.0745544514595706	2.2933333333333334	S. DenseNet	5
130	2.0792981230180185	2.311111111111111	S. DenseNet	5
131	2.074432559859339	2.328888888888889	S. DenseNet	5
132	2.0792358423538166	2.3466666666666667	S. DenseNet	5
133	2.079236313566317	2.3644444444444446	S. DenseNet	5
0	18.8536423694385	0.0	S. DenseNet	6
1	13.199743625518357	0.017777777777777778	S. DenseNet	6
2	10.284605757087666	0.035555555555555556	S. DenseNet	6
3	6.727621736277302	0.05333333333333334	S. DenseNet	6
4	8.01719014704425	0.07111111111111111	S. DenseNet	6
5	6.226633998842788	0.08888888888888889	S. DenseNet	6
6	9.819436967464414	0.10666666666666667	S. DenseNet	6
7	5.6140084006079585	0.12444444444444444	S. DenseNet	6
8	5.450776927652308	0.14222222222222222	S. DenseNet	6
9	4.056925756087291	0.16	S. DenseNet	6
10	5.669691429016967	0.17777777777777778	S. DenseNet	6
11	5.084465051878005	0.19555555555555557	S. DenseNet	6
12	4.858002791157368	0.21333333333333335	S. DenseNet	6
13	6.9555926886969415	0.2311111111111111	S. DenseNet	6
14	4.993114528982726	0.24888888888888888	S. DenseNet	6
15	4.05519573737007	0.26666666666666666	S. DenseNet	6
16	4.512081385058413	0.28444444444444444	S. DenseNet	6
17	3.830524974363392	0.3022222222222222	S. DenseNet	6
18	3.5119443892982325	0.32	S. DenseNet	6
19	3.1079252443799263	0.3377777777777778	S. DenseNet	6
20	3.3913776748635307	0.35555555555555557	S. DenseNet	6
21	3.4475632670460254	0.37333333333333335	S. DenseNet	6
22	3.312421180109269	0.39111111111111113	S. DenseNet	6
23	2.9086995390262906	0.4088888888888889	S. DenseNet	6
24	3.9247357135824017	0.4266666666666667	S. DenseNet	6
25	3.2835336412920997	0.4444444444444444	S. DenseNet	6
26	2.9701288771388543	0.4622222222222222	S. DenseNet	6
27	2.950304464117238	0.48	S. DenseNet	6
28	2.5233589826077654	0.49777777777777776	S. DenseNet	6
29	3.011253120133982	0.5155555555555555	S. DenseNet	6
30	3.1140566400463467	0.5333333333333333	S. DenseNet	6
31	2.770721334113712	0.5511111111111111	S. DenseNet	6
32	3.071940413139888	0.5688888888888889	S. DenseNet	6
33	3.0286238141438115	0.5866666666666667	S. DenseNet	6
34	3.1536843201677813	0.6044444444444445	S. DenseNet	6
35	3.507952352925579	0.6222222222222222	S. DenseNet	6
36	2.720155084527146	0.64	S. DenseNet	6
37	3.254962351346571	0.6577777777777778	S. DenseNet	6
38	2.9983258372996455	0.6755555555555556	S. DenseNet	6
39	2.385219048548813	0.6933333333333334	S. DenseNet	6
40	2.609226109364914	0.7111111111111111	S. DenseNet	6
41	2.3872058407185786	0.7288888888888889	S. DenseNet	6
42	2.3796554550141047	0.7466666666666667	S. DenseNet	6
43	2.5871786075534646	0.7644444444444445	S. DenseNet	6
44	2.274480896060707	0.7822222222222223	S. DenseNet	6
45	2.5134122313634544	0.8	S. DenseNet	6
46	2.4222655242955273	0.8177777777777778	S. DenseNet	6
47	2.462240840032481	0.8355555555555556	S. DenseNet	6
48	2.4246802304686823	0.8533333333333334	S. DenseNet	6
49	2.403608591958725	0.8711111111111111	S. DenseNet	6
50	2.3582149338365017	0.8888888888888888	S. DenseNet	6
51	2.4190204043400216	0.9066666666666666	S. DenseNet	6
52	2.42480068896745	0.9244444444444444	S. DenseNet	6
53	2.2626766592196295	0.9422222222222222	S. DenseNet	6
54	2.2537173642442294	0.96	S. DenseNet	6
55	2.3296093248287746	0.9777777777777777	S. DenseNet	6
56	2.4415737937444164	0.9955555555555555	S. DenseNet	6
57	2.3578427906079042	1.0133333333333334	S. DenseNet	6
58	2.4150581159314766	1.031111111111111	S. DenseNet	6
59	2.335807105784134	1.048888888888889	S. DenseNet	6
60	2.3894241237496834	1.0666666666666667	S. DenseNet	6
61	2.483190368843881	1.0844444444444445	S. DenseNet	6
62	2.363315837207951	1.1022222222222222	S. DenseNet	6
63	2.243812856885855	1.12	S. DenseNet	6
64	2.137742344623238	1.1377777777777778	S. DenseNet	6
65	2.246423926764072	1.1555555555555554	S. DenseNet	6
66	2.204441527367194	1.1733333333333333	S. DenseNet	6
67	2.265775729617316	1.191111111111111	S. DenseNet	6
68	2.0672891118546493	1.208888888888889	S. DenseNet	6
69	2.2968937465911927	1.2266666666666666	S. DenseNet	6
70	2.2157765642841203	1.2444444444444445	S. DenseNet	6
71	2.263140623491728	1.2622222222222221	S. DenseNet	6
72	2.3855112901394113	1.28	S. DenseNet	6
73	2.3811324082901417	1.2977777777777777	S. DenseNet	6
74	2.4150928502619315	1.3155555555555556	S. DenseNet	6
75	2.140100686490267	1.3333333333333333	S. DenseNet	6
76	2.186440925039628	1.3511111111111112	S. DenseNet	6
77	2.1901645914799235	1.3688888888888888	S. DenseNet	6
78	2.2377632408717325	1.3866666666666667	S. DenseNet	6
79	2.1586395477892086	1.4044444444444444	S. DenseNet	6
80	2.137335047608087	1.4222222222222223	S. DenseNet	6
81	2.134823648853946	1.44	S. DenseNet	6
82	2.134157799416743	1.4577777777777778	S. DenseNet	6
83	2.1591931699712608	1.4755555555555555	S. DenseNet	6
84	2.1315181589548318	1.4933333333333334	S. DenseNet	6
85	2.14622541391214	1.511111111111111	S. DenseNet	6
86	2.11706424665415	1.528888888888889	S. DenseNet	6
87	2.135678374646598	1.5466666666666666	S. DenseNet	6
88	2.11932746653188	1.5644444444444445	S. DenseNet	6
89	2.121948488592575	1.5822222222222222	S. DenseNet	6
90	2.108245285817956	1.6	S. DenseNet	6
91	2.110487502122888	1.6177777777777778	S. DenseNet	6
92	2.108429307733394	1.6355555555555557	S. DenseNet	6
93	2.1099049016972278	1.6533333333333333	S. DenseNet	6
94	2.1102324113193554	1.6711111111111112	S. DenseNet	6
95	2.114534643549657	1.6888888888888889	S. DenseNet	6
96	2.1163064525291144	1.7066666666666668	S. DenseNet	6
97	2.1262118434452413	1.7244444444444444	S. DenseNet	6
98	2.127933113578972	1.7422222222222221	S. DenseNet	6
99	2.1304657870649555	1.76	S. DenseNet	6
100	2.125283660320895	1.7777777777777777	S. DenseNet	6
101	2.131814890234449	1.7955555555555556	S. DenseNet	6
102	2.118969549583945	1.8133333333333332	S. DenseNet	6
103	2.1332276769378833	1.8311111111111111	S. DenseNet	6
104	2.0835291528680684	1.8488888888888888	S. DenseNet	6
105	2.1275199523895783	1.8666666666666667	S. DenseNet	6
106	2.1179524145360045	1.8844444444444444	S. DenseNet	6
107	2.117261992284782	1.9022222222222223	S. DenseNet	6
108	2.025369092430481	1.92	S. DenseNet	6
109	2.106626590163176	1.9377777777777778	S. DenseNet	6
110	2.0703359252977056	1.9555555555555555	S. DenseNet	6
111	2.1257733904240563	1.9733333333333334	S. DenseNet	6
112	2.129611283249181	1.991111111111111	S. DenseNet	6
113	2.1292004593949327	2.008888888888889	S. DenseNet	6
114	2.1186749632875825	2.026666666666667	S. DenseNet	6
115	2.1198722761986586	2.0444444444444443	S. DenseNet	6
116	2.1206785610415313	2.062222222222222	S. DenseNet	6
117	2.115604497358242	2.08	S. DenseNet	6
118	2.114711075005872	2.097777777777778	S. DenseNet	6
119	2.1144658784529327	2.1155555555555554	S. DenseNet	6
120	2.113920546292091	2.1333333333333333	S. DenseNet	6
121	2.1142320245855775	2.151111111111111	S. DenseNet	6
122	2.1141086172752845	2.168888888888889	S. DenseNet	6
123	2.1148993814973123	2.1866666666666665	S. DenseNet	6
124	2.1145211779535407	2.2044444444444444	S. DenseNet	6
125	2.1150834438977593	2.2222222222222223	S. DenseNet	6
126	2.1149939044792	2.24	S. DenseNet	6
127	2.1157743148197095	2.2577777777777777	S. DenseNet	6
128	2.1151366984654367	2.2755555555555556	S. DenseNet	6
129	2.1150252899230075	2.2933333333333334	S. DenseNet	6
130	2.1151062489433228	2.311111111111111	S. DenseNet	6
131	2.115518710580491	2.328888888888889	S. DenseNet	6
132	2.1154267960114463	2.3466666666666667	S. DenseNet	6
133	2.115563204600974	2.3644444444444446	S. DenseNet	6
134	2.115821091514328	2.382222222222222	S. DenseNet	6
135	2.1159234500661457	2.4	S. DenseNet	6
136	2.115781002563842	2.417777777777778	S. DenseNet	6
137	2.1155243301423274	2.4355555555555557	S. DenseNet	6
138	2.1156507415574386	2.453333333333333	S. DenseNet	6
139	2.115677231619462	2.471111111111111	S. DenseNet	6
140	2.115699735711275	2.488888888888889	S. DenseNet	6
141	2.115764644130429	2.506666666666667	S. DenseNet	6
142	2.1157165923003642	2.5244444444444443	S. DenseNet	6
143	2.1156725775524152	2.542222222222222	S. DenseNet	6
144	2.115826886215248	2.56	S. DenseNet	6
145	2.115896166234868	2.577777777777778	S. DenseNet	6
146	2.11582454971298	2.5955555555555554	S. DenseNet	6
147	2.1157848676484288	2.6133333333333333	S. DenseNet	6
148	2.1157685429280844	2.631111111111111	S. DenseNet	6
149	2.115792583782007	2.648888888888889	S. DenseNet	6
150	2.1157769571839897	2.6666666666666665	S. DenseNet	6
151	2.1157903287619173	2.6844444444444444	S. DenseNet	6
152	2.1157592339427924	2.7022222222222223	S. DenseNet	6
153	2.115810688336248	2.72	S. DenseNet	6
154	2.1157654023190657	2.7377777777777776	S. DenseNet	6
155	2.1157718240402055	2.7555555555555555	S. DenseNet	6
156	2.11579800610747	2.7733333333333334	S. DenseNet	6
157	2.1157893535491388	2.7911111111111113	S. DenseNet	6
158	2.1157976772956473	2.8088888888888888	S. DenseNet	6
0	15.77755793770172	0.0	S. DenseNet	7
1	16.31414089503491	0.017777777777777778	S. DenseNet	7
2	8.592712685359103	0.035555555555555556	S. DenseNet	7
3	7.518743420702115	0.05333333333333334	S. DenseNet	7
4	5.948012281882633	0.07111111111111111	S. DenseNet	7
5	6.92566895313875	0.08888888888888889	S. DenseNet	7
6	7.688838604928005	0.10666666666666667	S. DenseNet	7
7	5.472206524686768	0.12444444444444444	S. DenseNet	7
8	5.365629450154247	0.14222222222222222	S. DenseNet	7
9	3.5641794362304284	0.16	S. DenseNet	7
10	3.714234276703705	0.17777777777777778	S. DenseNet	7
11	3.281519240905531	0.19555555555555557	S. DenseNet	7
12	3.864053385565015	0.21333333333333335	S. DenseNet	7
13	4.466216128528934	0.2311111111111111	S. DenseNet	7
14	3.57482670778816	0.24888888888888888	S. DenseNet	7
15	3.744924103397249	0.26666666666666666	S. DenseNet	7
16	3.0461221276342036	0.28444444444444444	S. DenseNet	7
17	3.32958012504321	0.3022222222222222	S. DenseNet	7
18	3.6721476594473694	0.32	S. DenseNet	7
19	3.96348844927256	0.3377777777777778	S. DenseNet	7
20	3.6979712257348596	0.35555555555555557	S. DenseNet	7
21	4.183037905560128	0.37333333333333335	S. DenseNet	7
22	2.6386077878623437	0.39111111111111113	S. DenseNet	7
23	2.8090612153060603	0.4088888888888889	S. DenseNet	7
24	2.903390713535771	0.4266666666666667	S. DenseNet	7
25	3.6695263325733034	0.4444444444444444	S. DenseNet	7
26	2.9704398037293096	0.4622222222222222	S. DenseNet	7
27	3.3711098215727087	0.48	S. DenseNet	7
28	2.716227737304416	0.49777777777777776	S. DenseNet	7
29	2.5600579972718696	0.5155555555555555	S. DenseNet	7
30	2.450887434533596	0.5333333333333333	S. DenseNet	7
31	3.1581583439172185	0.5511111111111111	S. DenseNet	7
32	2.458202254426924	0.5688888888888889	S. DenseNet	7
33	2.6406670399215453	0.5866666666666667	S. DenseNet	7
34	2.8414713638871136	0.6044444444444445	S. DenseNet	7
35	3.252787541217283	0.6222222222222222	S. DenseNet	7
36	3.4193860084462404	0.64	S. DenseNet	7
37	3.9092207819675195	0.6577777777777778	S. DenseNet	7
38	4.095680656068457	0.6755555555555556	S. DenseNet	7
39	2.4282991495573962	0.6933333333333334	S. DenseNet	7
40	3.0425074161169094	0.7111111111111111	S. DenseNet	7
41	3.0630286907303	0.7288888888888889	S. DenseNet	7
42	2.5246901047433443	0.7466666666666667	S. DenseNet	7
43	2.313519700210804	0.7644444444444445	S. DenseNet	7
44	2.57628079234699	0.7822222222222223	S. DenseNet	7
45	2.6905006854178923	0.8	S. DenseNet	7
46	2.4927582741424765	0.8177777777777778	S. DenseNet	7
47	2.725919594920399	0.8355555555555556	S. DenseNet	7
48	2.20014965394956	0.8533333333333334	S. DenseNet	7
49	2.4699252530628524	0.8711111111111111	S. DenseNet	7
50	2.3646589129489586	0.8888888888888888	S. DenseNet	7
51	2.2509995988768874	0.9066666666666666	S. DenseNet	7
52	2.198196640651594	0.9244444444444444	S. DenseNet	7
53	2.1800546810788823	0.9422222222222222	S. DenseNet	7
54	3.0190620526501974	0.96	S. DenseNet	7
55	2.3100664876625863	0.9777777777777777	S. DenseNet	7
56	2.349863585514366	0.9955555555555555	S. DenseNet	7
57	2.2638694940348567	1.0133333333333334	S. DenseNet	7
58	2.5567277459039572	1.031111111111111	S. DenseNet	7
59	2.28127636639409	1.048888888888889	S. DenseNet	7
60	2.5733410238309045	1.0666666666666667	S. DenseNet	7
61	2.2973027526117944	1.0844444444444445	S. DenseNet	7
62	2.1643085835739035	1.1022222222222222	S. DenseNet	7
63	2.6629511750213943	1.12	S. DenseNet	7
64	2.3671561719675203	1.1377777777777778	S. DenseNet	7
65	2.295459202517981	1.1555555555555554	S. DenseNet	7
66	3.026367499783662	1.1733333333333333	S. DenseNet	7
67	2.21378359594509	1.191111111111111	S. DenseNet	7
68	2.5279529863117767	1.208888888888889	S. DenseNet	7
69	2.2204336234441215	1.2266666666666666	S. DenseNet	7
70	2.132309414355144	1.2444444444444445	S. DenseNet	7
71	2.1884587119240186	1.2622222222222221	S. DenseNet	7
72	2.3018298259326393	1.28	S. DenseNet	7
73	2.105292622072739	1.2977777777777777	S. DenseNet	7
74	2.0628555179662125	1.3155555555555556	S. DenseNet	7
75	2.044610982197774	1.3333333333333333	S. DenseNet	7
76	2.0334350302698843	1.3511111111111112	S. DenseNet	7
77	2.0215005665015715	1.3688888888888888	S. DenseNet	7
78	2.0454389955258314	1.3866666666666667	S. DenseNet	7
79	1.9822733761464764	1.4044444444444444	S. DenseNet	7
80	2.107269688730833	1.4222222222222223	S. DenseNet	7
81	2.0648035302655994	1.44	S. DenseNet	7
82	2.0092972901075945	1.4577777777777778	S. DenseNet	7
83	2.011142188664901	1.4755555555555555	S. DenseNet	7
84	1.9429067971491816	1.4933333333333334	S. DenseNet	7
85	2.0147897796162653	1.511111111111111	S. DenseNet	7
86	2.0167810427972803	1.528888888888889	S. DenseNet	7
87	1.9791248799785783	1.5466666666666666	S. DenseNet	7
88	1.9854625477974952	1.5644444444444445	S. DenseNet	7
89	1.9406503979720258	1.5822222222222222	S. DenseNet	7
90	1.9521350281267524	1.6	S. DenseNet	7
91	1.9742947837503084	1.6177777777777778	S. DenseNet	7
92	1.9623326724921772	1.6355555555555557	S. DenseNet	7
93	2.0429392811018023	1.6533333333333333	S. DenseNet	7
94	1.9689605347981964	1.6711111111111112	S. DenseNet	7
95	1.992410497762754	1.6888888888888889	S. DenseNet	7
96	1.9218189170109041	1.7066666666666668	S. DenseNet	7
97	1.9379489509286612	1.7244444444444444	S. DenseNet	7
98	1.9940634600479594	1.7422222222222221	S. DenseNet	7
99	1.9293754314565876	1.76	S. DenseNet	7
100	1.9394023167880627	1.7777777777777777	S. DenseNet	7
101	1.9517498110700182	1.7955555555555556	S. DenseNet	7
102	1.899222617445277	1.8133333333333332	S. DenseNet	7
103	1.9128749674819177	1.8311111111111111	S. DenseNet	7
104	1.9356851177336143	1.8488888888888888	S. DenseNet	7
105	1.9169942084413716	1.8666666666666667	S. DenseNet	7
106	1.9187136800096678	1.8844444444444444	S. DenseNet	7
107	1.910167680859472	1.9022222222222223	S. DenseNet	7
108	1.9396257521879567	1.92	S. DenseNet	7
109	1.9100023727531827	1.9377777777777778	S. DenseNet	7
110	1.8968045630588193	1.9555555555555555	S. DenseNet	7
111	1.9203076585056973	1.9733333333333334	S. DenseNet	7
112	1.9053936775719642	1.991111111111111	S. DenseNet	7
113	1.9701033818996296	2.008888888888889	S. DenseNet	7
114	1.9559719418013202	2.026666666666667	S. DenseNet	7
115	1.9317172936605345	2.0444444444444443	S. DenseNet	7
116	1.9089071912348177	2.062222222222222	S. DenseNet	7
117	1.9316453406218939	2.08	S. DenseNet	7
118	1.94303845233432	2.097777777777778	S. DenseNet	7
119	1.9575677774266345	2.1155555555555554	S. DenseNet	7
120	1.9079311401448518	2.1333333333333333	S. DenseNet	7
121	1.904518932474355	2.151111111111111	S. DenseNet	7
122	1.9118383923608382	2.168888888888889	S. DenseNet	7
123	1.897497682444	2.1866666666666665	S. DenseNet	7
124	1.8882452111613994	2.2044444444444444	S. DenseNet	7
125	1.8836835643514414	2.2222222222222223	S. DenseNet	7
126	1.8871398677212727	2.24	S. DenseNet	7
127	1.8836292213751964	2.2577777777777777	S. DenseNet	7
128	1.8781143342863627	2.2755555555555556	S. DenseNet	7
129	1.8835881035892397	2.2933333333333334	S. DenseNet	7
130	1.881195368150145	2.311111111111111	S. DenseNet	7
131	1.8928372418462283	2.328888888888889	S. DenseNet	7
132	1.8874667859365224	2.3466666666666667	S. DenseNet	7
133	1.882912005527365	2.3644444444444446	S. DenseNet	7
134	1.8826210325929145	2.382222222222222	S. DenseNet	7
135	1.8931330531328485	2.4	S. DenseNet	7
136	1.8875260307732722	2.417777777777778	S. DenseNet	7
137	1.886448418812638	2.4355555555555557	S. DenseNet	7
138	1.8784059726680864	2.453333333333333	S. DenseNet	7
139	1.8754027538936822	2.471111111111111	S. DenseNet	7
140	1.8732013245598307	2.488888888888889	S. DenseNet	7
141	1.8799918112225757	2.506666666666667	S. DenseNet	7
142	1.8689628667086184	2.5244444444444443	S. DenseNet	7
143	1.8664806640312792	2.542222222222222	S. DenseNet	7
144	1.8645037964673534	2.56	S. DenseNet	7
145	1.871420461622643	2.577777777777778	S. DenseNet	7
146	1.8724446556280916	2.5955555555555554	S. DenseNet	7
147	1.8745498315999312	2.6133333333333333	S. DenseNet	7
148	1.8654631925583767	2.631111111111111	S. DenseNet	7
149	1.8689371958527117	2.648888888888889	S. DenseNet	7
150	1.8721904781238923	2.6666666666666665	S. DenseNet	7
151	1.8659504131274014	2.6844444444444444	S. DenseNet	7
152	1.8669091994853408	2.7022222222222223	S. DenseNet	7
153	1.8634729624156723	2.72	S. DenseNet	7
154	1.8540894106173247	2.7377777777777776	S. DenseNet	7
155	1.8593714201556473	2.7555555555555555	S. DenseNet	7
156	1.8611284999710245	2.7733333333333334	S. DenseNet	7
157	1.8628750544875516	2.7911111111111113	S. DenseNet	7
158	1.8749106716942834	2.8088888888888888	S. DenseNet	7
159	1.8898046674061637	2.8266666666666667	S. DenseNet	7
160	1.8600986809739732	2.8444444444444446	S. DenseNet	7
161	1.8756985736671625	2.862222222222222	S. DenseNet	7
162	1.8591725393870002	2.88	S. DenseNet	7
163	1.8581659440043687	2.897777777777778	S. DenseNet	7
164	1.859809181771071	2.9155555555555557	S. DenseNet	7
165	1.8639779884759877	2.933333333333333	S. DenseNet	7
166	1.8625262389416852	2.951111111111111	S. DenseNet	7
167	1.8585639526342062	2.968888888888889	S. DenseNet	7
168	1.8650685275474683	2.986666666666667	S. DenseNet	7
169	1.8658478967296261	3.0044444444444443	S. DenseNet	7
170	1.856967635008104	3.022222222222222	S. DenseNet	7
171	1.8464124993111646	3.04	S. DenseNet	7
172	1.8498502635513256	3.057777777777778	S. DenseNet	7
173	1.8433294979039152	3.0755555555555554	S. DenseNet	7
174	1.8482092720731236	3.0933333333333333	S. DenseNet	7
175	1.850284459342854	3.111111111111111	S. DenseNet	7
176	1.8532067819941584	3.128888888888889	S. DenseNet	7
177	1.848971278658505	3.1466666666666665	S. DenseNet	7
178	1.845219404768406	3.1644444444444444	S. DenseNet	7
179	1.856178343020258	3.1822222222222223	S. DenseNet	7
180	1.8411103077019073	3.2	S. DenseNet	7
181	1.8393027559066615	3.2177777777777776	S. DenseNet	7
182	1.8451925530910132	3.2355555555555555	S. DenseNet	7
183	1.8473142467532429	3.2533333333333334	S. DenseNet	7
184	1.8483639315498648	3.2711111111111113	S. DenseNet	7
185	1.8615636988382616	3.2888888888888888	S. DenseNet	7
186	1.8576677512475412	3.3066666666666666	S. DenseNet	7
187	1.8488719312074857	3.3244444444444445	S. DenseNet	7
188	1.8424150035437128	3.3422222222222224	S. DenseNet	7
189	1.8517933855417794	3.36	S. DenseNet	7
190	1.854554812864381	3.3777777777777778	S. DenseNet	7
191	1.8574081322413543	3.3955555555555557	S. DenseNet	7
192	1.8584716630029177	3.4133333333333336	S. DenseNet	7
193	1.8635431086528362	3.431111111111111	S. DenseNet	7
194	1.8492780116853689	3.448888888888889	S. DenseNet	7
195	1.8565957417827663	3.466666666666667	S. DenseNet	7
196	1.8481950499616815	3.4844444444444442	S. DenseNet	7
197	1.8412304272732416	3.502222222222222	S. DenseNet	7
198	1.8484921722604561	3.52	S. DenseNet	7
199	1.841889496997469	3.537777777777778	S. DenseNet	7
200	1.8415372236764396	3.5555555555555554	S. DenseNet	7
201	1.8413138555502155	3.5733333333333333	S. DenseNet	7
202	1.8408843781539022	3.591111111111111	S. DenseNet	7
203	1.8409001376448832	3.608888888888889	S. DenseNet	7
204	1.8413197912883643	3.6266666666666665	S. DenseNet	7
205	1.8454355310145794	3.6444444444444444	S. DenseNet	7
206	1.8471625722560787	3.6622222222222223	S. DenseNet	7
207	1.845141851600094	3.68	S. DenseNet	7
208	1.8411199585193134	3.6977777777777776	S. DenseNet	7
209	1.8412239205728895	3.7155555555555555	S. DenseNet	7
210	1.8414727167364275	3.7333333333333334	S. DenseNet	7
211	1.841368640847801	3.7511111111111113	S. DenseNet	7
212	1.8413279070866693	3.7688888888888887	S. DenseNet	7
213	1.8403794781971115	3.7866666666666666	S. DenseNet	7
214	1.8410268518426376	3.8044444444444445	S. DenseNet	7
215	1.8398833399833046	3.8222222222222224	S. DenseNet	7
216	1.840055313516836	3.84	S. DenseNet	7
217	1.8391243616678776	3.8577777777777778	S. DenseNet	7
218	1.8399278824234786	3.8755555555555556	S. DenseNet	7
219	1.8399672235619289	3.8933333333333335	S. DenseNet	7
220	1.8390811669824183	3.911111111111111	S. DenseNet	7
221	1.8387295384598985	3.928888888888889	S. DenseNet	7
222	1.837482093511524	3.9466666666666668	S. DenseNet	7
223	1.8376052220968475	3.9644444444444447	S. DenseNet	7
224	1.8381474257585106	3.982222222222222	S. DenseNet	7
225	1.8385282513888808	4.0	S. DenseNet	7
226	1.839645746173785	4.017777777777778	S. DenseNet	7
227	1.839488622003686	4.035555555555556	S. DenseNet	7
228	1.8402932427854444	4.053333333333334	S. DenseNet	7
229	1.8417169749002846	4.071111111111111	S. DenseNet	7
230	1.8408363552713238	4.088888888888889	S. DenseNet	7
231	1.8401159058473524	4.1066666666666665	S. DenseNet	7
232	1.8392216168636828	4.124444444444444	S. DenseNet	7
233	1.8390307536064983	4.142222222222222	S. DenseNet	7
234	1.8389704775164182	4.16	S. DenseNet	7
235	1.8388209833806275	4.177777777777778	S. DenseNet	7
236	1.8389294397771279	4.195555555555556	S. DenseNet	7
237	1.8389629698215686	4.213333333333333	S. DenseNet	7
238	1.839029359737384	4.231111111111111	S. DenseNet	7
239	1.8389989123081676	4.248888888888889	S. DenseNet	7
240	1.8387771539450233	4.266666666666667	S. DenseNet	7
241	1.8390300381323386	4.2844444444444445	S. DenseNet	7
242	1.8388715691136557	4.302222222222222	S. DenseNet	7
243	1.8389672796921581	4.32	S. DenseNet	7
244	1.8389384976823118	4.337777777777778	S. DenseNet	7
245	1.8389522917385432	4.355555555555555	S. DenseNet	7
246	1.8388533342717557	4.373333333333333	S. DenseNet	7
247	1.8388069165408831	4.391111111111111	S. DenseNet	7
248	1.838803464746262	4.408888888888889	S. DenseNet	7
249	1.8388679044739364	4.426666666666667	S. DenseNet	7
250	1.8389224563666073	4.444444444444445	S. DenseNet	7
251	1.8388942213654687	4.4622222222222225	S. DenseNet	7
252	1.8389021276686617	4.48	S. DenseNet	7
253	1.8389201106458262	4.497777777777777	S. DenseNet	7
254	1.8390231364477825	4.515555555555555	S. DenseNet	7
255	1.8388596033302662	4.533333333333333	S. DenseNet	7
256	1.8388068753083748	4.551111111111111	S. DenseNet	7
257	1.8388961396084245	4.568888888888889	S. DenseNet	7
258	1.8389166062785365	4.586666666666667	S. DenseNet	7
259	1.8388928189650229	4.604444444444445	S. DenseNet	7
260	1.8388838426775154	4.622222222222222	S. DenseNet	7
261	1.8389368610324064	4.64	S. DenseNet	7
262	1.8388299056483155	4.657777777777778	S. DenseNet	7
263	1.838891849362575	4.6755555555555555	S. DenseNet	7
264	1.8388539082758486	4.693333333333333	S. DenseNet	7
265	1.8388669542520986	4.711111111111111	S. DenseNet	7
266	1.8388478861747597	4.728888888888889	S. DenseNet	7
267	1.8388874446942074	4.746666666666667	S. DenseNet	7
268	1.8389150093124877	4.764444444444444	S. DenseNet	7
269	1.8388799214223985	4.782222222222222	S. DenseNet	7
270	1.8388606211415697	4.8	S. DenseNet	7
271	1.8388987325881276	4.817777777777778	S. DenseNet	7
272	1.8388477285123015	4.835555555555556	S. DenseNet	7
0	9.929734408997701	0.0	S. DenseNet	8
1	11.749930553898889	0.017777777777777778	S. DenseNet	8
2	8.965797543251389	0.035555555555555556	S. DenseNet	8
3	8.219810631331121	0.05333333333333334	S. DenseNet	8
4	5.577145770621509	0.07111111111111111	S. DenseNet	8
5	6.649662059806782	0.08888888888888889	S. DenseNet	8
6	4.286944081669814	0.10666666666666667	S. DenseNet	8
7	5.235084843969149	0.12444444444444444	S. DenseNet	8
8	4.857449458893855	0.14222222222222222	S. DenseNet	8
9	3.4701062506482545	0.16	S. DenseNet	8
10	3.5446363860604553	0.17777777777777778	S. DenseNet	8
11	4.764083916030521	0.19555555555555557	S. DenseNet	8
12	3.8538584035086285	0.21333333333333335	S. DenseNet	8
13	4.215718011853268	0.2311111111111111	S. DenseNet	8
14	2.8790513286027637	0.24888888888888888	S. DenseNet	8
15	2.9165160210917405	0.26666666666666666	S. DenseNet	8
16	3.597792120609694	0.28444444444444444	S. DenseNet	8
17	3.3196289648813786	0.3022222222222222	S. DenseNet	8
18	4.209113315967247	0.32	S. DenseNet	8
19	2.4836061971394443	0.3377777777777778	S. DenseNet	8
20	2.603123780893914	0.35555555555555557	S. DenseNet	8
21	3.4136726474519374	0.37333333333333335	S. DenseNet	8
22	3.5335710812166123	0.39111111111111113	S. DenseNet	8
23	2.7095199259180975	0.4088888888888889	S. DenseNet	8
24	2.406857383147624	0.4266666666666667	S. DenseNet	8
25	2.749345660465463	0.4444444444444444	S. DenseNet	8
26	2.666484686912307	0.4622222222222222	S. DenseNet	8
27	2.528000536581013	0.48	S. DenseNet	8
28	3.3475722346768917	0.49777777777777776	S. DenseNet	8
29	3.175745373092699	0.5155555555555555	S. DenseNet	8
30	2.832984515608095	0.5333333333333333	S. DenseNet	8
31	3.2146621016817183	0.5511111111111111	S. DenseNet	8
32	2.7971650006733157	0.5688888888888889	S. DenseNet	8
33	2.4055739483388177	0.5866666666666667	S. DenseNet	8
34	2.3730360240296715	0.6044444444444445	S. DenseNet	8
35	2.492954327381192	0.6222222222222222	S. DenseNet	8
36	2.2867083794842022	0.64	S. DenseNet	8
37	2.680382186735572	0.6577777777777778	S. DenseNet	8
38	2.225970455445433	0.6755555555555556	S. DenseNet	8
39	2.2763616688965325	0.6933333333333334	S. DenseNet	8
40	2.0778327131585557	0.7111111111111111	S. DenseNet	8
41	2.2507719170839966	0.7288888888888889	S. DenseNet	8
42	2.392575507674108	0.7466666666666667	S. DenseNet	8
43	2.37339971121073	0.7644444444444445	S. DenseNet	8
44	2.2480998867438817	0.7822222222222223	S. DenseNet	8
45	2.5830902853046998	0.8	S. DenseNet	8
46	2.472877480639835	0.8177777777777778	S. DenseNet	8
47	2.2893133962496237	0.8355555555555556	S. DenseNet	8
48	2.0418390586540287	0.8533333333333334	S. DenseNet	8
49	2.6986083327666894	0.8711111111111111	S. DenseNet	8
50	3.1145558030215286	0.8888888888888888	S. DenseNet	8
51	3.1290755340430763	0.9066666666666666	S. DenseNet	8
52	2.7634682202926735	0.9244444444444444	S. DenseNet	8
53	2.3827601810508083	0.9422222222222222	S. DenseNet	8
54	4.1782694819977255	0.96	S. DenseNet	8
55	2.734425972311789	0.9777777777777777	S. DenseNet	8
56	2.5647097618379053	0.9955555555555555	S. DenseNet	8
57	2.1410490897797616	1.0133333333333334	S. DenseNet	8
58	2.591930728927628	1.031111111111111	S. DenseNet	8
59	2.3181546170220106	1.048888888888889	S. DenseNet	8
60	2.3906739624072615	1.0666666666666667	S. DenseNet	8
61	2.0937235704870774	1.0844444444444445	S. DenseNet	8
62	2.408064149341735	1.1022222222222222	S. DenseNet	8
63	2.3586094418471246	1.12	S. DenseNet	8
64	1.8953718515270104	1.1377777777777778	S. DenseNet	8
65	1.8845135698247675	1.1555555555555554	S. DenseNet	8
66	1.906104004390234	1.1733333333333333	S. DenseNet	8
67	1.9302200265383929	1.191111111111111	S. DenseNet	8
68	2.4534970448286417	1.208888888888889	S. DenseNet	8
69	2.341170767041281	1.2266666666666666	S. DenseNet	8
70	1.9952957688136959	1.2444444444444445	S. DenseNet	8
71	1.8669215278827522	1.2622222222222221	S. DenseNet	8
72	1.8317469836267515	1.28	S. DenseNet	8
73	2.019322815744649	1.2977777777777777	S. DenseNet	8
74	1.9047592846090273	1.3155555555555556	S. DenseNet	8
75	2.1359202275642346	1.3333333333333333	S. DenseNet	8
76	1.9734348857514792	1.3511111111111112	S. DenseNet	8
77	1.8298888142960115	1.3688888888888888	S. DenseNet	8
78	1.864436010558392	1.3866666666666667	S. DenseNet	8
79	1.8798871575835348	1.4044444444444444	S. DenseNet	8
80	1.8651751954899904	1.4222222222222223	S. DenseNet	8
81	1.8991742697208283	1.44	S. DenseNet	8
82	1.8453476866190732	1.4577777777777778	S. DenseNet	8
83	1.8528881623438105	1.4755555555555555	S. DenseNet	8
84	1.826015440405256	1.4933333333333334	S. DenseNet	8
85	1.7717377168764608	1.511111111111111	S. DenseNet	8
86	1.8699514530226105	1.528888888888889	S. DenseNet	8
87	2.1081335828486227	1.5466666666666666	S. DenseNet	8
88	2.1457579197467305	1.5644444444444445	S. DenseNet	8
89	1.79903910609496	1.5822222222222222	S. DenseNet	8
90	1.848622621021486	1.6	S. DenseNet	8
91	1.861818836139459	1.6177777777777778	S. DenseNet	8
92	1.8520671657874461	1.6355555555555557	S. DenseNet	8
93	1.876819413687621	1.6533333333333333	S. DenseNet	8
94	1.8283396742885574	1.6711111111111112	S. DenseNet	8
95	1.8305910579145506	1.6888888888888889	S. DenseNet	8
96	1.9309840602641741	1.7066666666666668	S. DenseNet	8
97	1.925022028710496	1.7244444444444444	S. DenseNet	8
98	1.8368400075467728	1.7422222222222221	S. DenseNet	8
99	1.8821010451618632	1.76	S. DenseNet	8
100	1.8708147288474672	1.7777777777777777	S. DenseNet	8
101	1.7793974783368567	1.7955555555555556	S. DenseNet	8
102	1.918984740378226	1.8133333333333332	S. DenseNet	8
103	1.7663301050804885	1.8311111111111111	S. DenseNet	8
104	1.7944842738087474	1.8488888888888888	S. DenseNet	8
105	1.765063229282452	1.8666666666666667	S. DenseNet	8
106	1.7718715114806773	1.8844444444444444	S. DenseNet	8
107	1.8522205324218473	1.9022222222222223	S. DenseNet	8
108	1.8082475709888715	1.92	S. DenseNet	8
109	1.7947618476706604	1.9377777777777778	S. DenseNet	8
110	1.7075645296376392	1.9555555555555555	S. DenseNet	8
111	1.7101790347332788	1.9733333333333334	S. DenseNet	8
112	1.7460120592986812	1.991111111111111	S. DenseNet	8
113	1.7751057587879258	2.008888888888889	S. DenseNet	8
114	1.7917029450226445	2.026666666666667	S. DenseNet	8
115	1.7774018651307357	2.0444444444444443	S. DenseNet	8
116	1.7725242234585599	2.062222222222222	S. DenseNet	8
117	1.7590285857832497	2.08	S. DenseNet	8
118	1.827716771946583	2.097777777777778	S. DenseNet	8
119	1.7399434004792778	2.1155555555555554	S. DenseNet	8
120	1.7386947522009286	2.1333333333333333	S. DenseNet	8
121	1.803526779020616	2.151111111111111	S. DenseNet	8
122	2.1731694092401765	2.168888888888889	S. DenseNet	8
123	1.8766318519306517	2.1866666666666665	S. DenseNet	8
124	1.7873954470710616	2.2044444444444444	S. DenseNet	8
125	1.7825021725478494	2.2222222222222223	S. DenseNet	8
126	1.7438386617651815	2.24	S. DenseNet	8
127	1.8234326018524967	2.2577777777777777	S. DenseNet	8
128	1.8050898875420083	2.2755555555555556	S. DenseNet	8
129	1.7873674463642484	2.2933333333333334	S. DenseNet	8
130	1.7963904040229672	2.311111111111111	S. DenseNet	8
131	1.7835755576125931	2.328888888888889	S. DenseNet	8
132	1.7971023581617578	2.3466666666666667	S. DenseNet	8
133	1.7696035234630199	2.3644444444444446	S. DenseNet	8
134	1.7560447368488727	2.382222222222222	S. DenseNet	8
135	1.7767510990903423	2.4	S. DenseNet	8
136	1.7906715959992012	2.417777777777778	S. DenseNet	8
137	1.7761237756634873	2.4355555555555557	S. DenseNet	8
138	1.7846643664299466	2.453333333333333	S. DenseNet	8
139	1.7789132114964983	2.471111111111111	S. DenseNet	8
140	1.7757020237814567	2.488888888888889	S. DenseNet	8
141	1.746835773579198	2.506666666666667	S. DenseNet	8
142	1.7491970580866418	2.5244444444444443	S. DenseNet	8
143	1.7489449502927308	2.542222222222222	S. DenseNet	8
144	1.750996075778971	2.56	S. DenseNet	8
145	1.7520652472434757	2.577777777777778	S. DenseNet	8
146	1.756215235317831	2.5955555555555554	S. DenseNet	8
147	1.7493189731406027	2.6133333333333333	S. DenseNet	8
148	1.7502315471133598	2.631111111111111	S. DenseNet	8
149	1.7510389771640624	2.648888888888889	S. DenseNet	8
150	1.749795960986949	2.6666666666666665	S. DenseNet	8
151	1.7516451971511262	2.6844444444444444	S. DenseNet	8
152	1.7502316220842224	2.7022222222222223	S. DenseNet	8
153	1.7486230168505283	2.72	S. DenseNet	8
154	1.75043346297359	2.7377777777777776	S. DenseNet	8
155	1.7504378848256519	2.7555555555555555	S. DenseNet	8
156	1.7542393893627422	2.7733333333333334	S. DenseNet	8
157	1.7577760909086404	2.7911111111111113	S. DenseNet	8
158	1.7516063670650956	2.8088888888888888	S. DenseNet	8
159	1.7498285358058694	2.8266666666666667	S. DenseNet	8
160	1.7502442803592642	2.8444444444444446	S. DenseNet	8
161	1.7531887253861842	2.862222222222222	S. DenseNet	8
162	1.748942713685179	2.88	S. DenseNet	8
163	1.7515668949715575	2.897777777777778	S. DenseNet	8
164	1.7484774344980598	2.9155555555555557	S. DenseNet	8
165	1.750753162439886	2.933333333333333	S. DenseNet	8
166	1.746858910048396	2.951111111111111	S. DenseNet	8
167	1.7759053689083293	2.968888888888889	S. DenseNet	8
168	1.773887546694834	2.986666666666667	S. DenseNet	8
169	1.7746208222440005	3.0044444444444443	S. DenseNet	8
170	1.7716732096865935	3.022222222222222	S. DenseNet	8
171	1.7716844306107615	3.04	S. DenseNet	8
172	1.7736013146608547	3.057777777777778	S. DenseNet	8
173	1.771529277650665	3.0755555555555554	S. DenseNet	8
174	1.7744372667091581	3.0933333333333333	S. DenseNet	8
175	1.7708635804899853	3.111111111111111	S. DenseNet	8
176	1.7741736543510427	3.128888888888889	S. DenseNet	8
177	1.7675409655569927	3.1466666666666665	S. DenseNet	8
178	1.776833526837457	3.1644444444444444	S. DenseNet	8
179	1.7707843443964426	3.1822222222222223	S. DenseNet	8
180	1.7763949587878645	3.2	S. DenseNet	8
181	1.7787929134274785	3.2177777777777776	S. DenseNet	8
182	1.7713539487098284	3.2355555555555555	S. DenseNet	8
183	1.7713349817497601	3.2533333333333334	S. DenseNet	8
184	1.776883941607546	3.2711111111111113	S. DenseNet	8
185	1.780649752103016	3.2888888888888888	S. DenseNet	8
186	1.7787266961461814	3.3066666666666666	S. DenseNet	8
187	1.7808363909775737	3.3244444444444445	S. DenseNet	8
188	1.7797374343699837	3.3422222222222224	S. DenseNet	8
189	1.7783557557143457	3.36	S. DenseNet	8
190	1.7776090128578423	3.3777777777777778	S. DenseNet	8
191	1.775664444263018	3.3955555555555557	S. DenseNet	8
192	1.7752740468885853	3.4133333333333336	S. DenseNet	8
193	1.7740338480249096	3.431111111111111	S. DenseNet	8
194	1.7743033517117284	3.448888888888889	S. DenseNet	8
195	1.7739860775377352	3.466666666666667	S. DenseNet	8
196	1.7733025901503203	3.4844444444444442	S. DenseNet	8
197	1.7732845549098024	3.502222222222222	S. DenseNet	8
198	1.7731352828642741	3.52	S. DenseNet	8
199	1.7742670236306366	3.537777777777778	S. DenseNet	8
200	1.7729679509450285	3.5555555555555554	S. DenseNet	8
201	1.7733113874155606	3.5733333333333333	S. DenseNet	8
202	1.772834129982383	3.591111111111111	S. DenseNet	8
203	1.772166231853958	3.608888888888889	S. DenseNet	8
204	1.7735686267849917	3.6266666666666665	S. DenseNet	8
205	1.7731479515691404	3.6444444444444444	S. DenseNet	8
206	1.775177335332004	3.6622222222222223	S. DenseNet	8
207	1.7739784832087315	3.68	S. DenseNet	8
208	1.773677400111561	3.6977777777777776	S. DenseNet	8
209	1.7729543268748964	3.7155555555555555	S. DenseNet	8
210	1.7735888253781698	3.7333333333333334	S. DenseNet	8
211	1.7734689455589754	3.7511111111111113	S. DenseNet	8
212	1.773958555244686	3.7688888888888887	S. DenseNet	8
213	1.7733535714851099	3.7866666666666666	S. DenseNet	8
214	1.7740204565532443	3.8044444444444445	S. DenseNet	8
215	1.7743761378433174	3.8222222222222224	S. DenseNet	8
216	1.774327662114546	3.84	S. DenseNet	8
217	1.7742297162610137	3.8577777777777778	S. DenseNet	8
218	1.7741434734953774	3.8755555555555556	S. DenseNet	8
219	1.774008725497683	3.8933333333333335	S. DenseNet	8
220	1.7748754708289565	3.911111111111111	S. DenseNet	8
221	1.776273944577038	3.928888888888889	S. DenseNet	8
222	1.7751344235572488	3.9466666666666668	S. DenseNet	8
223	1.7745436670898775	3.9644444444444447	S. DenseNet	8
224	1.7736430098051859	3.982222222222222	S. DenseNet	8
225	1.7747782471440336	4.0	S. DenseNet	8
226	1.7748990112246394	4.017777777777778	S. DenseNet	8
227	1.775751383329252	4.035555555555556	S. DenseNet	8
228	1.7746780935323496	4.053333333333334	S. DenseNet	8
229	1.775512479313758	4.071111111111111	S. DenseNet	8
230	1.7752931782018828	4.088888888888889	S. DenseNet	8
231	1.7751925147266914	4.1066666666666665	S. DenseNet	8
232	1.7745494983752135	4.124444444444444	S. DenseNet	8
233	1.7742025201611527	4.142222222222222	S. DenseNet	8
234	1.7741995865002098	4.16	S. DenseNet	8
235	1.7738729796762014	4.177777777777778	S. DenseNet	8
236	1.7733415314199603	4.195555555555556	S. DenseNet	8
237	1.772860301215558	4.213333333333333	S. DenseNet	8
238	1.7733648993397162	4.231111111111111	S. DenseNet	8
239	1.7733845448775836	4.248888888888889	S. DenseNet	8
240	1.7733782849720143	4.266666666666667	S. DenseNet	8
241	1.7734545335570535	4.2844444444444445	S. DenseNet	8
242	1.773338922753104	4.302222222222222	S. DenseNet	8
243	1.7733553340315111	4.32	S. DenseNet	8
244	1.7733455324521428	4.337777777777778	S. DenseNet	8
245	1.7734772119472177	4.355555555555555	S. DenseNet	8
246	1.7734418828954974	4.373333333333333	S. DenseNet	8
247	1.7734101415763672	4.391111111111111	S. DenseNet	8
248	1.7733784221556672	4.408888888888889	S. DenseNet	8
249	1.773173595309475	4.426666666666667	S. DenseNet	8
250	1.77310655355845	4.444444444444445	S. DenseNet	8
251	1.7731525469339198	4.4622222222222225	S. DenseNet	8
252	1.7730927479763094	4.48	S. DenseNet	8
253	1.7731936702006008	4.497777777777777	S. DenseNet	8
254	1.773132736527234	4.515555555555555	S. DenseNet	8
255	1.7732173867985188	4.533333333333333	S. DenseNet	8
256	1.7732561282756325	4.551111111111111	S. DenseNet	8
257	1.7732848180548715	4.568888888888889	S. DenseNet	8
258	1.773053062563683	4.586666666666667	S. DenseNet	8
259	1.773251656118905	4.604444444444445	S. DenseNet	8
260	1.7731592170254424	4.622222222222222	S. DenseNet	8
261	1.7732482404722834	4.64	S. DenseNet	8
262	1.7732931605408486	4.657777777777778	S. DenseNet	8
263	1.773209308856061	4.6755555555555555	S. DenseNet	8
264	1.7732184814156584	4.693333333333333	S. DenseNet	8
265	1.7731782427469491	4.711111111111111	S. DenseNet	8
266	1.773158606115553	4.728888888888889	S. DenseNet	8
267	1.773298270945558	4.746666666666667	S. DenseNet	8
268	1.7731954574966402	4.764444444444444	S. DenseNet	8
269	1.773350669200447	4.782222222222222	S. DenseNet	8
0	34.932095961356126	0.0	DeepLabCut	0
1	38.980942842750146	0.020833333333333332	DeepLabCut	0
2	23.0421555371791	0.041666666666666664	DeepLabCut	0
3	9.595936481995771	0.0625	DeepLabCut	0
4	11.660292993466157	0.08333333333333333	DeepLabCut	0
5	6.88216202228253	0.10416666666666667	DeepLabCut	0
6	7.491071727325412	0.125	DeepLabCut	0
7	6.604059247871212	0.14583333333333334	DeepLabCut	0
8	6.088874808246403	0.16666666666666666	DeepLabCut	0
9	6.047800283414457	0.1875	DeepLabCut	0
10	5.882414896491287	0.20833333333333334	DeepLabCut	0
11	7.556051503809753	0.22916666666666666	DeepLabCut	0
12	7.124670684279047	0.25	DeepLabCut	0
13	5.508380099447168	0.2708333333333333	DeepLabCut	0
14	7.014821227415981	0.2916666666666667	DeepLabCut	0
15	7.252627587361492	0.3125	DeepLabCut	0
16	6.060709774314407	0.3333333333333333	DeepLabCut	0
17	5.656914886007884	0.3541666666666667	DeepLabCut	0
18	7.048447856301217	0.375	DeepLabCut	0
19	4.5391260345006375	0.3958333333333333	DeepLabCut	0
20	6.898570650247655	0.4166666666666667	DeepLabCut	0
21	5.992080033524048	0.4375	DeepLabCut	0
22	4.9726874878344915	0.4583333333333333	DeepLabCut	0
23	4.121182659820755	0.4791666666666667	DeepLabCut	0
24	7.931953546483483	0.5	DeepLabCut	0
25	4.882700970838037	0.5208333333333334	DeepLabCut	0
26	6.335356627413799	0.5416666666666666	DeepLabCut	0
27	5.838959434753176	0.5625	DeepLabCut	0
28	4.761656643388984	0.5833333333333334	DeepLabCut	0
29	4.630093330921891	0.6041666666666666	DeepLabCut	0
30	3.6650419826830527	0.625	DeepLabCut	0
31	6.14594722011184	0.6458333333333334	DeepLabCut	0
32	4.8931748028828315	0.6666666666666666	DeepLabCut	0
33	5.068796096093596	0.6875	DeepLabCut	0
34	4.539761362665494	0.7083333333333334	DeepLabCut	0
35	5.0010146630471874	0.7291666666666666	DeepLabCut	0
36	5.840878217122765	0.75	DeepLabCut	0
37	5.7579717974234494	0.7708333333333334	DeepLabCut	0
38	4.4909317789106895	0.7916666666666666	DeepLabCut	0
39	4.286077284335868	0.8125	DeepLabCut	0
40	5.051586125282327	0.8333333333333334	DeepLabCut	0
41	5.585617291890073	0.8541666666666666	DeepLabCut	0
42	5.146818926336677	0.875	DeepLabCut	0
43	4.5622203350598385	0.8958333333333334	DeepLabCut	0
44	4.697907259408898	0.9166666666666666	DeepLabCut	0
45	4.738285078049367	0.9375	DeepLabCut	0
46	3.9904451286539437	0.9583333333333334	DeepLabCut	0
47	4.71859621381521	0.9791666666666666	DeepLabCut	0
48	4.638947787071226	1.0	DeepLabCut	0
49	4.623806712756933	1.0208333333333333	DeepLabCut	0
50	4.7485358754291065	1.0416666666666667	DeepLabCut	0
51	4.802815153248128	1.0625	DeepLabCut	0
52	4.036870128854747	1.0833333333333333	DeepLabCut	0
53	4.8889821816743	1.1041666666666667	DeepLabCut	0
54	4.379935932223286	1.125	DeepLabCut	0
55	4.439796064174359	1.1458333333333333	DeepLabCut	0
56	4.205255515391817	1.1666666666666667	DeepLabCut	0
57	4.315385722634836	1.1875	DeepLabCut	0
58	4.247179626870742	1.2083333333333333	DeepLabCut	0
59	4.197668766814327	1.2291666666666667	DeepLabCut	0
60	4.297441828128101	1.25	DeepLabCut	0
61	4.167341396179246	1.2708333333333333	DeepLabCut	0
62	4.174957222720846	1.2916666666666667	DeepLabCut	0
63	4.189547370198107	1.3125	DeepLabCut	0
64	4.165866056521054	1.3333333333333333	DeepLabCut	0
65	4.309440078489351	1.3541666666666667	DeepLabCut	0
66	4.377186278199303	1.375	DeepLabCut	0
67	4.37465847425672	1.3958333333333333	DeepLabCut	0
68	4.38844014097594	1.4166666666666667	DeepLabCut	0
69	4.356029201859314	1.4375	DeepLabCut	0
70	4.309042932740891	1.4583333333333333	DeepLabCut	0
71	4.328901651614106	1.4791666666666667	DeepLabCut	0
72	4.398569892372402	1.5	DeepLabCut	0
73	4.385146395227377	1.5208333333333333	DeepLabCut	0
74	4.353980699398462	1.5416666666666667	DeepLabCut	0
75	4.416185741119853	1.5625	DeepLabCut	0
76	4.4268043139364766	1.5833333333333333	DeepLabCut	0
77	4.40205914284706	1.6041666666666667	DeepLabCut	0
78	4.390498985763629	1.625	DeepLabCut	0
79	4.405409347297603	1.6458333333333333	DeepLabCut	0
80	4.410241034212886	1.6666666666666667	DeepLabCut	0
81	4.406550994496294	1.6875	DeepLabCut	0
82	4.408558458953843	1.7083333333333333	DeepLabCut	0
83	4.409192828942384	1.7291666666666667	DeepLabCut	0
84	4.366329423452258	1.75	DeepLabCut	0
85	4.385525977827403	1.7708333333333333	DeepLabCut	0
86	4.3806912472762525	1.7916666666666667	DeepLabCut	0
87	4.411031543084621	1.8125	DeepLabCut	0
88	4.399952459545866	1.8333333333333333	DeepLabCut	0
89	4.390267909073856	1.8541666666666667	DeepLabCut	0
90	4.385846686008807	1.875	DeepLabCut	0
91	4.3510874256192595	1.8958333333333333	DeepLabCut	0
92	4.387985384270871	1.9166666666666667	DeepLabCut	0
93	4.368739573080606	1.9375	DeepLabCut	0
94	4.384175029277943	1.9583333333333333	DeepLabCut	0
95	4.349968741016138	1.9791666666666667	DeepLabCut	0
96	4.380730004254008	2.0	DeepLabCut	0
0	20.388410658442197	0.0	DeepLabCut	1
1	37.767617605999504	0.020833333333333332	DeepLabCut	1
2	25.310784418311318	0.041666666666666664	DeepLabCut	1
3	10.621109432020656	0.0625	DeepLabCut	1
4	18.587539172348166	0.08333333333333333	DeepLabCut	1
5	7.374383021183804	0.10416666666666667	DeepLabCut	1
6	7.2406792655963175	0.125	DeepLabCut	1
7	8.369624739719786	0.14583333333333334	DeepLabCut	1
8	4.94555820222598	0.16666666666666666	DeepLabCut	1
9	9.52157604596523	0.1875	DeepLabCut	1
10	6.938096497011481	0.20833333333333334	DeepLabCut	1
11	5.869141356682362	0.22916666666666666	DeepLabCut	1
12	4.550960578116823	0.25	DeepLabCut	1
13	4.711946281320609	0.2708333333333333	DeepLabCut	1
14	5.9554335278760995	0.2916666666666667	DeepLabCut	1
15	6.523072005606045	0.3125	DeepLabCut	1
16	5.841161654033062	0.3333333333333333	DeepLabCut	1
17	5.6604323714363565	0.3541666666666667	DeepLabCut	1
18	4.130497138747948	0.375	DeepLabCut	1
19	5.38228757275872	0.3958333333333333	DeepLabCut	1
20	4.004423567962239	0.4166666666666667	DeepLabCut	1
21	4.74220906853372	0.4375	DeepLabCut	1
22	4.142845061873401	0.4583333333333333	DeepLabCut	1
23	4.974085939441487	0.4791666666666667	DeepLabCut	1
24	4.544712425787288	0.5	DeepLabCut	1
25	4.911673418782651	0.5208333333333334	DeepLabCut	1
26	4.604516991326423	0.5416666666666666	DeepLabCut	1
27	4.667047072510882	0.5625	DeepLabCut	1
28	6.174537868932497	0.5833333333333334	DeepLabCut	1
29	4.38739777451853	0.6041666666666666	DeepLabCut	1
30	7.417705362586948	0.625	DeepLabCut	1
31	4.1998948100065485	0.6458333333333334	DeepLabCut	1
32	3.5186362427506914	0.6666666666666666	DeepLabCut	1
33	4.176867876304235	0.6875	DeepLabCut	1
34	3.972374947234603	0.7083333333333334	DeepLabCut	1
35	3.5253462766826242	0.7291666666666666	DeepLabCut	1
36	4.0363030274359515	0.75	DeepLabCut	1
37	3.776139106345082	0.7708333333333334	DeepLabCut	1
38	3.6776386467191284	0.7916666666666666	DeepLabCut	1
39	3.628196746703587	0.8125	DeepLabCut	1
40	4.011863824855068	0.8333333333333334	DeepLabCut	1
41	3.6250425830082422	0.8541666666666666	DeepLabCut	1
42	3.6453500818644513	0.875	DeepLabCut	1
43	3.2258031048528037	0.8958333333333334	DeepLabCut	1
44	3.796052173832595	0.9166666666666666	DeepLabCut	1
45	3.271407268421667	0.9375	DeepLabCut	1
46	3.3529642348677045	0.9583333333333334	DeepLabCut	1
47	3.9624144845182596	0.9791666666666666	DeepLabCut	1
48	3.6855496247671193	1.0	DeepLabCut	1
49	3.90382464736208	1.0208333333333333	DeepLabCut	1
50	3.815922662822151	1.0416666666666667	DeepLabCut	1
51	4.140668721452481	1.0625	DeepLabCut	1
52	4.306722613248224	1.0833333333333333	DeepLabCut	1
53	3.9354206764584823	1.1041666666666667	DeepLabCut	1
54	4.11232190709032	1.125	DeepLabCut	1
55	3.791664997100847	1.1458333333333333	DeepLabCut	1
56	3.87173206660667	1.1666666666666667	DeepLabCut	1
57	3.7739808880968093	1.1875	DeepLabCut	1
58	4.010228911613052	1.2083333333333333	DeepLabCut	1
59	3.9733561954905974	1.2291666666666667	DeepLabCut	1
60	3.9054107283645845	1.25	DeepLabCut	1
61	3.7591995132810263	1.2708333333333333	DeepLabCut	1
62	3.661388822029619	1.2916666666666667	DeepLabCut	1
63	3.465918946836438	1.3125	DeepLabCut	1
64	3.640673511831764	1.3333333333333333	DeepLabCut	1
65	3.6499027984825227	1.3541666666666667	DeepLabCut	1
66	3.663630066324979	1.375	DeepLabCut	1
67	3.4781428966253	1.3958333333333333	DeepLabCut	1
68	3.570947992531083	1.4166666666666667	DeepLabCut	1
69	3.3616791220417443	1.4375	DeepLabCut	1
70	3.207278046848034	1.4583333333333333	DeepLabCut	1
71	3.553543857824479	1.4791666666666667	DeepLabCut	1
72	3.5580673039065203	1.5	DeepLabCut	1
73	3.4133439078634837	1.5208333333333333	DeepLabCut	1
74	3.228767214392236	1.5416666666666667	DeepLabCut	1
75	3.3591212713146725	1.5625	DeepLabCut	1
76	3.4640895245079335	1.5833333333333333	DeepLabCut	1
77	3.7204886669321495	1.6041666666666667	DeepLabCut	1
78	3.641057080026692	1.625	DeepLabCut	1
79	3.537099012501616	1.6458333333333333	DeepLabCut	1
80	3.3258874024864182	1.6666666666666667	DeepLabCut	1
81	3.3483787482635714	1.6875	DeepLabCut	1
82	3.4541249001472902	1.7083333333333333	DeepLabCut	1
83	3.504425809488676	1.7291666666666667	DeepLabCut	1
84	3.47956228539606	1.75	DeepLabCut	1
85	3.4431799689107003	1.7708333333333333	DeepLabCut	1
86	3.458598416349938	1.7916666666666667	DeepLabCut	1
87	3.424898471113078	1.8125	DeepLabCut	1
88	3.487766529406934	1.8333333333333333	DeepLabCut	1
89	3.472083879030216	1.8541666666666667	DeepLabCut	1
90	3.4879232378043157	1.875	DeepLabCut	1
91	3.512623923972962	1.8958333333333333	DeepLabCut	1
92	3.4942911749139944	1.9166666666666667	DeepLabCut	1
93	3.5238769323535073	1.9375	DeepLabCut	1
94	3.4883382805800816	1.9583333333333333	DeepLabCut	1
95	3.4979975242420194	1.9791666666666667	DeepLabCut	1
96	3.4983671179933755	2.0	DeepLabCut	1
97	3.4977599605982506	2.0208333333333335	DeepLabCut	1
98	3.4992203571728475	2.0416666666666665	DeepLabCut	1
99	3.5461915565012534	2.0625	DeepLabCut	1
100	3.5241150128908987	2.0833333333333335	DeepLabCut	1
101	3.5585288682502174	2.1041666666666665	DeepLabCut	1
102	3.541027358961712	2.125	DeepLabCut	1
103	3.5178639660325417	2.1458333333333335	DeepLabCut	1
104	3.5244798644745363	2.1666666666666665	DeepLabCut	1
105	3.5304927764998513	2.1875	DeepLabCut	1
106	3.529705504185811	2.2083333333333335	DeepLabCut	1
107	3.518092416225549	2.2291666666666665	DeepLabCut	1
108	3.522459311919269	2.25	DeepLabCut	1
109	3.5343076611255118	2.2708333333333335	DeepLabCut	1
110	3.530458889779674	2.2916666666666665	DeepLabCut	1
111	3.5280848667028812	2.3125	DeepLabCut	1
112	3.5235185396895714	2.3333333333333335	DeepLabCut	1
113	3.519442473986094	2.3541666666666665	DeepLabCut	1
114	3.5258918520796816	2.375	DeepLabCut	1
115	3.557106228494223	2.3958333333333335	DeepLabCut	1
116	3.5256047477563306	2.4166666666666665	DeepLabCut	1
117	3.53999427266027	2.4375	DeepLabCut	1
118	3.5530445188111903	2.4583333333333335	DeepLabCut	1
119	3.516740515129887	2.4791666666666665	DeepLabCut	1
120	3.537642010869744	2.5	DeepLabCut	1
0	49.42382225688198	0.0	DeepLabCut	2
1	36.28879924282283	0.020833333333333332	DeepLabCut	2
2	14.715167010444148	0.041666666666666664	DeepLabCut	2
3	22.37035013340288	0.0625	DeepLabCut	2
4	6.870341964657814	0.08333333333333333	DeepLabCut	2
5	8.158352890337452	0.10416666666666667	DeepLabCut	2
6	6.87606614716374	0.125	DeepLabCut	2
7	6.052993754006565	0.14583333333333334	DeepLabCut	2
8	6.3254534182839	0.16666666666666666	DeepLabCut	2
9	5.562385246056339	0.1875	DeepLabCut	2
10	5.75035453174421	0.20833333333333334	DeepLabCut	2
11	5.057523398134195	0.22916666666666666	DeepLabCut	2
12	6.974337662796493	0.25	DeepLabCut	2
13	4.1481387156123075	0.2708333333333333	DeepLabCut	2
14	4.527975213443876	0.2916666666666667	DeepLabCut	2
15	4.9166278258590825	0.3125	DeepLabCut	2
16	6.305272094600176	0.3333333333333333	DeepLabCut	2
17	4.264460278426269	0.3541666666666667	DeepLabCut	2
18	5.973279063131266	0.375	DeepLabCut	2
19	3.9697490204733183	0.3958333333333333	DeepLabCut	2
20	4.43109335068466	0.4166666666666667	DeepLabCut	2
21	3.5438651233081035	0.4375	DeepLabCut	2
22	3.759493693973495	0.4583333333333333	DeepLabCut	2
23	4.348153990217064	0.4791666666666667	DeepLabCut	2
24	4.316916025438117	0.5	DeepLabCut	2
25	3.6365862789474455	0.5208333333333334	DeepLabCut	2
26	4.651887396277422	0.5416666666666666	DeepLabCut	2
27	3.454300249773421	0.5625	DeepLabCut	2
28	4.44618477854014	0.5833333333333334	DeepLabCut	2
29	3.753390317435202	0.6041666666666666	DeepLabCut	2
30	4.523937935135207	0.625	DeepLabCut	2
31	4.289808973321672	0.6458333333333334	DeepLabCut	2
32	3.354846157858905	0.6666666666666666	DeepLabCut	2
33	4.41842802604827	0.6875	DeepLabCut	2
34	3.413517087242907	0.7083333333333334	DeepLabCut	2
35	3.972240328897422	0.7291666666666666	DeepLabCut	2
36	3.537391976432518	0.75	DeepLabCut	2
37	3.8861433336772437	0.7708333333333334	DeepLabCut	2
38	3.875439087482962	0.7916666666666666	DeepLabCut	2
39	3.382947439261677	0.8125	DeepLabCut	2
40	3.709011955619742	0.8333333333333334	DeepLabCut	2
41	3.9293739663158442	0.8541666666666666	DeepLabCut	2
42	3.372146599432674	0.875	DeepLabCut	2
43	3.3316544941801953	0.8958333333333334	DeepLabCut	2
44	3.254105642306875	0.9166666666666666	DeepLabCut	2
45	2.9907475314674876	0.9375	DeepLabCut	2
46	4.007093149716751	0.9583333333333334	DeepLabCut	2
47	3.6715930556105203	0.9791666666666666	DeepLabCut	2
48	3.1711779093591814	1.0	DeepLabCut	2
49	3.2596594514536217	1.0208333333333333	DeepLabCut	2
50	2.8930412499051483	1.0416666666666667	DeepLabCut	2
51	3.010633556720577	1.0625	DeepLabCut	2
52	3.6813401161557042	1.0833333333333333	DeepLabCut	2
53	3.8334781831270224	1.1041666666666667	DeepLabCut	2
54	3.2787966040285674	1.125	DeepLabCut	2
55	3.73421998983756	1.1458333333333333	DeepLabCut	2
56	3.142739978842243	1.1666666666666667	DeepLabCut	2
57	2.9327484029551814	1.1875	DeepLabCut	2
58	4.040051885756249	1.2083333333333333	DeepLabCut	2
59	3.1789610914450246	1.2291666666666667	DeepLabCut	2
60	3.1473747715281863	1.25	DeepLabCut	2
61	2.776176610931403	1.2708333333333333	DeepLabCut	2
62	3.0618799130620213	1.2916666666666667	DeepLabCut	2
63	2.9641982396998774	1.3125	DeepLabCut	2
64	3.0121433456454514	1.3333333333333333	DeepLabCut	2
65	2.9019619677961135	1.3541666666666667	DeepLabCut	2
66	2.8699247101310403	1.375	DeepLabCut	2
67	2.93796331478298	1.3958333333333333	DeepLabCut	2
68	3.1336786850491523	1.4166666666666667	DeepLabCut	2
69	2.7428152425800776	1.4375	DeepLabCut	2
70	2.9732702832772393	1.4583333333333333	DeepLabCut	2
71	3.2133193632852124	1.4791666666666667	DeepLabCut	2
72	3.147785211716938	1.5	DeepLabCut	2
73	2.913179213007883	1.5208333333333333	DeepLabCut	2
74	2.7288650743337177	1.5416666666666667	DeepLabCut	2
75	3.1841755863471746	1.5625	DeepLabCut	2
76	2.9611579831934307	1.5833333333333333	DeepLabCut	2
77	2.8242012811821917	1.6041666666666667	DeepLabCut	2
78	2.9416742965754303	1.625	DeepLabCut	2
79	2.706418011547366	1.6458333333333333	DeepLabCut	2
80	2.696189474489555	1.6666666666666667	DeepLabCut	2
81	2.756490148039309	1.6875	DeepLabCut	2
82	2.6383227081758673	1.7083333333333333	DeepLabCut	2
83	2.5620576262552133	1.7291666666666667	DeepLabCut	2
84	2.7689408328149683	1.75	DeepLabCut	2
85	2.7563905145120544	1.7708333333333333	DeepLabCut	2
86	2.6839683254020725	1.7916666666666667	DeepLabCut	2
87	2.6247266419605326	1.8125	DeepLabCut	2
88	2.7852288713917575	1.8333333333333333	DeepLabCut	2
89	2.607749351978653	1.8541666666666667	DeepLabCut	2
90	2.5398636442480296	1.875	DeepLabCut	2
91	2.6571877511016	1.8958333333333333	DeepLabCut	2
92	3.1507716441743283	1.9166666666666667	DeepLabCut	2
93	2.706955796211039	1.9375	DeepLabCut	2
94	3.2262659203875597	1.9583333333333333	DeepLabCut	2
95	2.6633782480821524	1.9791666666666667	DeepLabCut	2
96	2.7403554607215925	2.0	DeepLabCut	2
97	2.6122232401914642	2.0208333333333335	DeepLabCut	2
98	2.624523257640874	2.0416666666666665	DeepLabCut	2
99	2.673550602028623	2.0625	DeepLabCut	2
100	2.6972709451172654	2.0833333333333335	DeepLabCut	2
101	2.511527367545912	2.1041666666666665	DeepLabCut	2
102	2.5972259979078745	2.125	DeepLabCut	2
103	2.922013522310523	2.1458333333333335	DeepLabCut	2
104	2.896149576630423	2.1666666666666665	DeepLabCut	2
105	2.5338611076874917	2.1875	DeepLabCut	2
106	2.4061836101949816	2.2083333333333335	DeepLabCut	2
107	2.6016267113302907	2.2291666666666665	DeepLabCut	2
108	2.6344084399556533	2.25	DeepLabCut	2
109	2.6120287360176313	2.2708333333333335	DeepLabCut	2
110	2.7665888673666448	2.2916666666666665	DeepLabCut	2
111	2.6486987422331083	2.3125	DeepLabCut	2
[truncated: 2,440 more rows]
