# Supplementary material for: DeepPoseKit, a software toolkit for fast and robust animal pose estimation using deep learning
Source: eLife. 2019 Oct 1;8:e47994. doi: 10.7554/eLife.47994 (PMC6897514; doi:10.7554/eLife.47994)
Supplement: Appendix 1—figure 4—source data 1. — See 'Materials and methods’ for details. [file elife-47994-app1-fig4-data1.csv]

	error	prop	model
0	3.225064351699584	5	S. DenseNet
1	2.252707354905841	5	S. DenseNet
2	1.9139716698001967	5	S. DenseNet
3	1.7700519406726245	5	S. DenseNet
4	1.2308106793774147	5	S. DenseNet
5	0.19641274633084493	5	S. DenseNet
6	0.5322777769233289	5	S. DenseNet
7	1.0938532847205953	5	S. DenseNet
8	2.0289867756969495	5	S. DenseNet
9	35.582697503707344	5	S. DenseNet
10	26.399019151404392	5	S. DenseNet
11	4.541605264880979	5	S. DenseNet
12	4.385221468720353	5	S. DenseNet
13	6.047163481067094	5	S. DenseNet
14	4.084228090419915	5	S. DenseNet
15	3.6011228790784116	5	S. DenseNet
16	0.816058455627487	5	S. DenseNet
17	1.7346059936794544	5	S. DenseNet
18	1.5335654848109153	5	S. DenseNet
19	1.7298125925944483	5	S. DenseNet
20	2.0159133734444956	5	S. DenseNet
21	1.9485317585267325	5	S. DenseNet
22	1.6695680110038187	5	S. DenseNet
23	0.3143855537513882	5	S. DenseNet
24	0.4170597373651386	5	S. DenseNet
25	1.7204040987504594	5	S. DenseNet
26	1.6286482608862485	5	S. DenseNet
27	3.39225265445658	5	S. DenseNet
28	3.8408310810423103	5	S. DenseNet
29	6.878571552180414	5	S. DenseNet
30	4.627660288118504	5	S. DenseNet
31	3.060803069755496	5	S. DenseNet
32	3.4109133678605326	5	S. DenseNet
33	0.46784030685713923	5	S. DenseNet
34	2.402375722675842	5	S. DenseNet
35	0.3985428343954621	5	S. DenseNet
36	14.44746448522245	5	S. DenseNet
37	10.621378721746135	5	S. DenseNet
38	8.240880834199457	5	S. DenseNet
39	6.22334310552456	5	S. DenseNet
40	4.2257760324503675	5	S. DenseNet
41	3.431886551838549	5	S. DenseNet
42	0.8448957526695422	5	S. DenseNet
43	0.8452761916865552	5	S. DenseNet
44	4.893801083433106	5	S. DenseNet
45	2.2985468036136636	5	S. DenseNet
46	2.9481947155541524	5	S. DenseNet
47	4.339361510947031	5	S. DenseNet
48	1.3947539782045923	5	S. DenseNet
49	0.8265465927350483	5	S. DenseNet
50	0.8716565420608252	5	S. DenseNet
51	1.0343228589759526	5	S. DenseNet
52	0.6641090096345468	5	S. DenseNet
53	1.6780329323604695	5	S. DenseNet
54	2.4554912095226173	5	S. DenseNet
55	1.481191810686609	5	S. DenseNet
56	1.586339218714691	5	S. DenseNet
57	2.0844747384402695	5	S. DenseNet
58	1.1880292680929487	5	S. DenseNet
59	0.47937772748842755	5	S. DenseNet
60	0.12907915124500977	5	S. DenseNet
61	0.6314129552731141	5	S. DenseNet
62	2.1276868076422573	5	S. DenseNet
63	1.6734650676762715	5	S. DenseNet
64	1.3837034458840405	5	S. DenseNet
65	2.8645591669379384	5	S. DenseNet
66	2.853857387713092	5	S. DenseNet
67	2.7291623357423975	5	S. DenseNet
68	2.2675723939141808	5	S. DenseNet
69	1.9261987105780727	5	S. DenseNet
70	1.3880840613674614	5	S. DenseNet
71	2.1013405396790996	5	S. DenseNet
72	1.7064812927406543	5	S. DenseNet
73	0.3518037780473883	5	S. DenseNet
74	3.9670324877093264	5	S. DenseNet
75	1.4351322601201684	5	S. DenseNet
76	1.2637740854924866	5	S. DenseNet
77	1.1575063478304919	5	S. DenseNet
78	0.8881369926505862	5	S. DenseNet
79	1.2820210606923281	5	S. DenseNet
80	1.339867185827908	5	S. DenseNet
81	2.136765913121239	5	S. DenseNet
82	2.070595590451287	5	S. DenseNet
83	3.004113509593589	5	S. DenseNet
84	0.6851447668504904	5	S. DenseNet
85	1.2799856036637443	5	S. DenseNet
86	2.5452987380237126	5	S. DenseNet
87	2.7941496993211303	5	S. DenseNet
88	2.964142925714384	5	S. DenseNet
89	39.723895418282034	5	S. DenseNet
90	3.9561155831722443	5	S. DenseNet
91	5.745787356092996	5	S. DenseNet
92	6.877975616005438	5	S. DenseNet
93	6.597764219888239	5	S. DenseNet
94	5.714080875749328	5	S. DenseNet
95	0.7034979151022002	5	S. DenseNet
96	1.3195199038948533	5	S. DenseNet
97	1.2271988359166799	5	S. DenseNet
98	0.9842712143154027	5	S. DenseNet
99	3.506154748033514	5	S. DenseNet
100	4.634200756690097	5	S. DenseNet
101	5.316143690075607	5	S. DenseNet
102	1.8285676224547553	5	S. DenseNet
103	0.4040624070335722	5	S. DenseNet
104	1.2174957603830887	5	S. DenseNet
105	1.4259876026288643	5	S. DenseNet
106	1.6027942852697026	5	S. DenseNet
107	1.0198945414623872	5	S. DenseNet
108	3.8048730654085285	5	S. DenseNet
109	7.744723222136442	5	S. DenseNet
110	2.516582078347607	5	S. DenseNet
111	0.5929846914953543	5	S. DenseNet
112	2.0534398481933076	5	S. DenseNet
113	1.2938353322489575	5	S. DenseNet
114	0.4789462223046976	5	S. DenseNet
115	0.7500851911623257	5	S. DenseNet
116	20.464451384242224	5	S. DenseNet
117	1.9031983202649454	5	S. DenseNet
118	2.9211287240326302	5	S. DenseNet
119	5.741536863729661	5	S. DenseNet
120	7.736157036076933	5	S. DenseNet
121	7.393614827932736	5	S. DenseNet
122	1.3886509577161912	5	S. DenseNet
123	0.254903044225233	5	S. DenseNet
124	1.2854541077416533	5	S. DenseNet
125	6.3859658946233875	5	S. DenseNet
126	6.185766344678664	5	S. DenseNet
127	0.7632800508559197	5	S. DenseNet
128	1.4644769703151548	5	S. DenseNet
129	5.577664974731823	5	S. DenseNet
130	2.4033786640775405	5	S. DenseNet
131	2.5975111195812697	5	S. DenseNet
132	1.1486506287773255	5	S. DenseNet
133	3.3194497416381	5	S. DenseNet
134	4.019805187006163	5	S. DenseNet
135	1.6121342793261393	5	S. DenseNet
136	3.602417858216758	5	S. DenseNet
137	0.7752851266687364	5	S. DenseNet
138	1.8445602127226841	5	S. DenseNet
139	4.860199500416907	5	S. DenseNet
140	3.080700255926055	5	S. DenseNet
141	2.4870360105725062	5	S. DenseNet
142	0.9647905255679878	5	S. DenseNet
143	2.6491556034774275	5	S. DenseNet
144	3.7942295180680596	5	S. DenseNet
145	0.52690490131386	5	S. DenseNet
146	1.291371044520864	5	S. DenseNet
147	2.317786579210047	5	S. DenseNet
148	1.4543190348509836	5	S. DenseNet
149	1.3781629499748287	5	S. DenseNet
150	1.5234298776901414	5	S. DenseNet
151	1.6201160516658157	5	S. DenseNet
152	0.9703369880604374	5	S. DenseNet
153	2.8428243703955567	5	S. DenseNet
154	4.277566566357824	5	S. DenseNet
155	5.4246235207266515	5	S. DenseNet
156	2.7602305305413113	5	S. DenseNet
157	3.1199008898113654	5	S. DenseNet
158	1.2357792141078356	5	S. DenseNet
159	2.0702017145993454	5	S. DenseNet
160	0.7399259942423795	5	S. DenseNet
161	1.5246586903495067	5	S. DenseNet
162	1.3671171091370122	5	S. DenseNet
163	0.6716558137588049	5	S. DenseNet
164	2.255722515289843	5	S. DenseNet
165	0.9626720902146523	5	S. DenseNet
166	0.12859107577772522	5	S. DenseNet
167	4.131117681814789	5	S. DenseNet
168	3.48685466353522	5	S. DenseNet
169	3.866448761772956	5	S. DenseNet
170	6.9602975070088	5	S. DenseNet
171	9.038384471286221	5	S. DenseNet
172	6.772970581978953	5	S. DenseNet
173	0.1613976330735373	5	S. DenseNet
174	0.8265048547574374	5	S. DenseNet
175	0.10433349587099534	5	S. DenseNet
176	1.2813378101625932	5	S. DenseNet
177	1.235070497072798	5	S. DenseNet
178	1.0041250528461754	5	S. DenseNet
179	3.6565609391382674	5	S. DenseNet
180	2.7684999900573155	5	S. DenseNet
181	0.8330406012017151	5	S. DenseNet
182	2.5932585718346344	5	S. DenseNet
183	1.762753958474177	5	S. DenseNet
184	1.1970517467571415	5	S. DenseNet
185	0.5106894491554624	5	S. DenseNet
186	1.9669616141943793	5	S. DenseNet
187	1.5158242066231606	5	S. DenseNet
188	9.360171624681714	5	S. DenseNet
189	0.23256131871164865	5	S. DenseNet
190	0.6132628951875414	5	S. DenseNet
191	5.680612695520417	5	S. DenseNet
192	4.358640258464553	5	S. DenseNet
193	0.9851931431308024	5	S. DenseNet
194	1.600208143116631	5	S. DenseNet
195	1.142715650444742	5	S. DenseNet
196	2.0846401225512925	5	S. DenseNet
197	3.9204725991416978	5	S. DenseNet
198	22.103674688165324	5	S. DenseNet
199	11.971535242243664	5	S. DenseNet
200	17.770957750317407	5	S. DenseNet
201	10.208627177398387	5	S. DenseNet
202	15.015605509739322	5	S. DenseNet
203	2.9135040697528876	5	S. DenseNet
204	4.2224177268791925	5	S. DenseNet
205	1.0004549537069996	5	S. DenseNet
206	16.994758420818194	5	S. DenseNet
207	1.0827707487277427	5	S. DenseNet
208	4.752916511372489	5	S. DenseNet
209	0.48707428741619646	5	S. DenseNet
210	0.2731175792296799	5	S. DenseNet
211	1.349284666122193	5	S. DenseNet
212	0.15241866789407368	5	S. DenseNet
213	0.5537583470467674	5	S. DenseNet
214	0.9347355743530683	5	S. DenseNet
215	8.880929314926496	5	S. DenseNet
216	6.333384007631328	5	S. DenseNet
217	2.4078149817224554	5	S. DenseNet
218	3.9477081811382653	5	S. DenseNet
219	2.406719681800413	5	S. DenseNet
220	4.275478569056526	5	S. DenseNet
221	1.6401158298868974	5	S. DenseNet
222	3.2353754686212794	5	S. DenseNet
223	2.4255100191597205	5	S. DenseNet
224	2.0031539990455647	5	S. DenseNet
225	1.2451313947247384	5	S. DenseNet
226	0.26125228285599633	5	S. DenseNet
227	4.543738080577395	5	S. DenseNet
228	3.786338882571252	5	S. DenseNet
229	1.86637338006723	5	S. DenseNet
230	0.26563326755558486	5	S. DenseNet
231	0.5298989635621489	5	S. DenseNet
232	1.0107316262981274	5	S. DenseNet
233	62.35680978034095	5	S. DenseNet
234	2.2276975362989733	5	S. DenseNet
235	2.7200652842669317	5	S. DenseNet
236	2.79128088205184	5	S. DenseNet
237	3.4968024211031024	5	S. DenseNet
238	2.538151933780925	5	S. DenseNet
239	4.2937249404576825	5	S. DenseNet
240	3.3697673995829556	5	S. DenseNet
241	1.9282291043376867	5	S. DenseNet
242	2.415916855918027	5	S. DenseNet
243	4.445603366559232	5	S. DenseNet
244	1.2827590800613864	5	S. DenseNet
245	3.4724963065601337	5	S. DenseNet
246	1.396644084274117	5	S. DenseNet
247	1.759556555243803	5	S. DenseNet
248	1.138278265427023	5	S. DenseNet
249	0.349016314475687	5	S. DenseNet
250	0.5248208324654804	5	S. DenseNet
251	0.5674500919470458	5	S. DenseNet
252	3.80201036512804	5	S. DenseNet
253	1.7810215343256257	5	S. DenseNet
254	3.0860400496546236	5	S. DenseNet
255	2.4807360760278656	5	S. DenseNet
256	1.9279858817967555	5	S. DenseNet
257	2.534959943196811	5	S. DenseNet
258	0.9586397985062747	5	S. DenseNet
259	3.3814209083759432	5	S. DenseNet
260	12.427438740862916	5	S. DenseNet
261	24.919321662130262	5	S. DenseNet
262	15.273205943675576	5	S. DenseNet
263	5.811958560780174	5	S. DenseNet
264	16.501324148535705	5	S. DenseNet
265	14.757634119051836	5	S. DenseNet
266	33.963671967512134	5	S. DenseNet
267	32.66694848650815	5	S. DenseNet
268	34.56035528569228	5	S. DenseNet
269	32.96824595049264	5	S. DenseNet
270	23.539270520480187	5	S. DenseNet
271	17.365226428118163	5	S. DenseNet
272	15.702994474675302	5	S. DenseNet
273	14.605103586564349	5	S. DenseNet
274	7.391021847636056	5	S. DenseNet
275	1.9519861803924357	5	S. DenseNet
276	1.435806570887353	5	S. DenseNet
277	1.102696442425237	5	S. DenseNet
278	2.0398080286624243	5	S. DenseNet
279	16.777651293494475	5	S. DenseNet
280	11.205836092594362	5	S. DenseNet
281	4.058652157421345	5	S. DenseNet
282	1.7613851365511337	5	S. DenseNet
283	4.635385116123361	5	S. DenseNet
284	2.8065723117102204	5	S. DenseNet
285	2.0890887019458635	5	S. DenseNet
286	2.7345028852433826	5	S. DenseNet
287	3.7300660206531053	5	S. DenseNet
288	1.9718890588496516	5	S. DenseNet
289	1.5357104554973091	5	S. DenseNet
290	3.860236454590242	5	S. DenseNet
291	2.2440009073509377	5	S. DenseNet
292	5.606575936037159	5	S. DenseNet
293	0.26486704141370093	5	S. DenseNet
294	2.972921901814278	5	S. DenseNet
295	1.5160735836759174	5	S. DenseNet
296	5.866239467775211	5	S. DenseNet
297	21.702157735103285	5	S. DenseNet
298	8.957320759114646	5	S. DenseNet
299	7.864885143304189	5	S. DenseNet
300	7.767670951067054	5	S. DenseNet
301	7.483230680538466	5	S. DenseNet
302	0.2998901229596605	5	S. DenseNet
303	2.1223108238829695	5	S. DenseNet
304	3.060036962677669	5	S. DenseNet
305	4.6668915764197685	5	S. DenseNet
306	0.9728178894189677	5	S. DenseNet
307	0.47336922576056933	5	S. DenseNet
308	1.768221291868443	5	S. DenseNet
309	0.3274923078369797	5	S. DenseNet
310	0.3374786463616144	5	S. DenseNet
311	1.2361847311893281	5	S. DenseNet
312	0.957210899123028	5	S. DenseNet
313	0.16723655575190746	5	S. DenseNet
314	3.312459969924802	5	S. DenseNet
315	1.495250699355174	5	S. DenseNet
316	1.9887227333427815	5	S. DenseNet
317	1.458767940890006	5	S. DenseNet
318	3.0249347085057434	5	S. DenseNet
319	3.636945362755559	5	S. DenseNet
320	1.2296959912464	5	S. DenseNet
321	0.9009399479268791	5	S. DenseNet
322	0.5820991093576777	5	S. DenseNet
323	2.1542778856638676	5	S. DenseNet
324	119.31927800621584	5	S. DenseNet
325	106.12543794692542	5	S. DenseNet
326	68.52179772916044	5	S. DenseNet
327	60.80273502594272	5	S. DenseNet
328	55.310153346878124	5	S. DenseNet
329	54.372592182121764	5	S. DenseNet
330	39.13782655007738	5	S. DenseNet
331	55.228300242830365	5	S. DenseNet
332	68.77682077649082	5	S. DenseNet
333	53.09218012809431	5	S. DenseNet
334	44.6943521075212	5	S. DenseNet
335	3.9234889167114	5	S. DenseNet
336	7.857303798501825	5	S. DenseNet
337	5.495383800352023	5	S. DenseNet
338	43.92843931826905	5	S. DenseNet
339	43.223067834456415	5	S. DenseNet
340	53.035570217285844	5	S. DenseNet
341	57.87255283941102	5	S. DenseNet
342	0.6167686413472171	5	S. DenseNet
343	0.6409867095410414	5	S. DenseNet
344	0.49673719499145597	5	S. DenseNet
345	1.7076218372689445	5	S. DenseNet
346	1.0188353359494973	5	S. DenseNet
347	2.5657060454162166	5	S. DenseNet
348	0.8910609167033652	5	S. DenseNet
349	1.0003862909015224	5	S. DenseNet
350	10.007154547882923	5	S. DenseNet
351	3.230257004157293	5	S. DenseNet
352	0.7592364561120957	5	S. DenseNet
353	0.41120684140580577	5	S. DenseNet
354	2.377895524401901	5	S. DenseNet
355	3.5205157273030148	5	S. DenseNet
356	0.4078111129938811	5	S. DenseNet
357	1.6783619208007299	5	S. DenseNet
358	2.1387838471601746	5	S. DenseNet
359	2.451220520676032	5	S. DenseNet
360	0.7127087708221809	5	S. DenseNet
361	1.0226067098514295	5	S. DenseNet
362	2.2736774467135894	5	S. DenseNet
363	0.7022959916005416	5	S. DenseNet
364	0.44515277426031763	5	S. DenseNet
365	1.3789173873140026	5	S. DenseNet
366	2.3233219858839513	5	S. DenseNet
367	1.3214972370975455	5	S. DenseNet
368	10.497231952404446	5	S. DenseNet
369	3.2683020039307515	5	S. DenseNet
370	0.6944043433646672	5	S. DenseNet
371	5.30844619187903	5	S. DenseNet
372	1.1601564438208032	5	S. DenseNet
373	2.4068869235661943	5	S. DenseNet
374	0.4357056978501344	5	S. DenseNet
375	1.3801469732740965	5	S. DenseNet
376	0.7670828319249443	5	S. DenseNet
377	5.328751375250936	5	S. DenseNet
378	16.46457120393609	5	S. DenseNet
379	13.323273494060912	5	S. DenseNet
380	7.548190221240369	5	S. DenseNet
381	6.6664443787615335	5	S. DenseNet
382	6.272186460414974	5	S. DenseNet
383	0.5064944388986674	5	S. DenseNet
384	4.084365388176459	5	S. DenseNet
385	3.0881170063371783	5	S. DenseNet
386	1.1216597126800913	5	S. DenseNet
387	28.254447793007337	5	S. DenseNet
388	26.303561838176897	5	S. DenseNet
389	26.749525442480845	5	S. DenseNet
390	31.67304822821977	5	S. DenseNet
391	28.665769236004078	5	S. DenseNet
392	34.722322305384594	5	S. DenseNet
393	28.22872351636904	5	S. DenseNet
394	6.474994042472934	5	S. DenseNet
395	51.97234270199427	5	S. DenseNet
396	1.0664904347045263	5	S. DenseNet
397	0.6503695142601654	5	S. DenseNet
398	2.4263620215960855	5	S. DenseNet
399	4.230321012666612	5	S. DenseNet
400	6.20459759446598	5	S. DenseNet
401	2.4545726191764627	5	S. DenseNet
402	2.6047843963920294	5	S. DenseNet
403	1.345996859352653	5	S. DenseNet
404	4.039600225042382	5	S. DenseNet
405	4.16674793030223	5	S. DenseNet
406	2.707517072736095	5	S. DenseNet
407	1.678364608168255	5	S. DenseNet
408	2.5248079855632044	5	S. DenseNet
409	0.9111696820359488	5	S. DenseNet
410	2.1022015689255182	5	S. DenseNet
411	0.6243702687995601	5	S. DenseNet
412	0.9153717349984866	5	S. DenseNet
413	6.552023783052678	5	S. DenseNet
414	2.674158002991786	5	S. DenseNet
415	0.9629990459784722	5	S. DenseNet
416	3.571342453541032	5	S. DenseNet
417	3.133421218517747	5	S. DenseNet
418	2.476010076087368	5	S. DenseNet
419	2.2906549809142707	5	S. DenseNet
420	0.3784745502559702	5	S. DenseNet
421	1.306150433899614	5	S. DenseNet
422	0.4673451727445838	5	S. DenseNet
423	1.1375879115994747	5	S. DenseNet
424	1.982397295366529	5	S. DenseNet
425	1.8126952105966117	5	S. DenseNet
426	0.8084534536521218	5	S. DenseNet
427	4.54724583846577	5	S. DenseNet
428	3.1892221236856337	5	S. DenseNet
429	0.9677600100611367	5	S. DenseNet
430	2.334533998897281	5	S. DenseNet
431	2.901921589332264	5	S. DenseNet
432	9.600193892530026	5	S. DenseNet
433	3.854699162340482	5	S. DenseNet
434	5.161479176291747	5	S. DenseNet
435	1.7198319610170416	5	S. DenseNet
436	1.5534102211967837	5	S. DenseNet
437	1.3554273338160305	5	S. DenseNet
438	1.9891208268073366	5	S. DenseNet
439	2.4111323594234744	5	S. DenseNet
440	0.5808471642446857	5	S. DenseNet
441	1.9079614068220307	5	S. DenseNet
442	0.9568766373552298	5	S. DenseNet
443	1.0950415831546874	5	S. DenseNet
444	1.4407070126036026	5	S. DenseNet
445	2.23584174985375	5	S. DenseNet
446	1.6703825696656605	5	S. DenseNet
447	1.163474826176836	5	S. DenseNet
448	1.218104141554376	5	S. DenseNet
449	1.301470016798994	5	S. DenseNet
450	19.616320791339415	5	S. DenseNet
451	38.51370538337157	5	S. DenseNet
452	41.201823903489625	5	S. DenseNet
453	32.45186510834848	5	S. DenseNet
454	31.234515246464237	5	S. DenseNet
455	4.731350103846759	5	S. DenseNet
456	35.48616022309534	5	S. DenseNet
457	8.470784452447285	5	S. DenseNet
458	9.74821684922349	5	S. DenseNet
459	1.2281122657599304	5	S. DenseNet
460	1.9224587946703873	5	S. DenseNet
461	3.250599262360836	5	S. DenseNet
462	0.8293723447233017	5	S. DenseNet
463	1.1256678717049966	5	S. DenseNet
464	1.0527400244989498	5	S. DenseNet
465	0.9710277155158288	5	S. DenseNet
466	0.9674635938783911	5	S. DenseNet
467	2.8779237674628773	5	S. DenseNet
468	2.770167807078988	5	S. DenseNet
469	9.974288632824416	5	S. DenseNet
470	12.057751909463144	5	S. DenseNet
471	8.377206537266346	5	S. DenseNet
472	7.155403102717206	5	S. DenseNet
473	1.3263417436821385	5	S. DenseNet
474	2.3416449627146614	5	S. DenseNet
475	1.3224304774173519	5	S. DenseNet
476	1.3136862866222843	5	S. DenseNet
477	7.122183683384849	5	S. DenseNet
478	5.328556576859199	5	S. DenseNet
479	6.517234400156603	5	S. DenseNet
480	4.870811317037703	5	S. DenseNet
481	3.668203363021897	5	S. DenseNet
482	1.961511646695496	5	S. DenseNet
483	2.3605792487362858	5	S. DenseNet
484	1.8510144855230781	5	S. DenseNet
485	5.772776048118881	5	S. DenseNet
486	3.440864568590013	5	S. DenseNet
487	1.0251382030575547	5	S. DenseNet
488	4.570659486262868	5	S. DenseNet
489	1.869791845168655	5	S. DenseNet
490	2.0379398373848217	5	S. DenseNet
491	0.9463113493377022	5	S. DenseNet
492	1.3003436954225758	5	S. DenseNet
493	0.7084742486124308	5	S. DenseNet
494	0.6899003393687408	5	S. DenseNet
495	2.7793086629862125	5	S. DenseNet
496	0.044530563790831486	5	S. DenseNet
497	0.6062486922865863	5	S. DenseNet
498	2.4686298067390755	5	S. DenseNet
499	3.2277682475693874	5	S. DenseNet
500	2.8103927189747564	5	S. DenseNet
501	1.1673413684118006	5	S. DenseNet
502	2.874572073558969	5	S. DenseNet
503	1.5774178728020087	5	S. DenseNet
504	1.2004929928967003	5	S. DenseNet
505	2.7030213932104576	5	S. DenseNet
506	1.646435245077936	5	S. DenseNet
507	1.5898249491508607	5	S. DenseNet
508	1.3017004255289473	5	S. DenseNet
509	1.2541312454359226	5	S. DenseNet
510	2.545394412907752	5	S. DenseNet
511	4.155569358084672	5	S. DenseNet
512	10.0347487087529	5	S. DenseNet
513	3.4974913175336013	5	S. DenseNet
514	1.0569454960634932	5	S. DenseNet
515	2.24335295797658	5	S. DenseNet
516	1.0030078318544213	5	S. DenseNet
517	0.2000192110132102	5	S. DenseNet
518	1.8219063405830613	5	S. DenseNet
519	2.5127152328420532	5	S. DenseNet
520	1.5260890905603017	5	S. DenseNet
521	9.262542567851018	5	S. DenseNet
522	0.7456327318933008	5	S. DenseNet
523	0.45109018931276296	5	S. DenseNet
524	1.385686470431141	5	S. DenseNet
525	1.916122246134471	5	S. DenseNet
526	1.1600755633602022	5	S. DenseNet
527	1.954600976557561	5	S. DenseNet
528	2.598514698556051	5	S. DenseNet
529	1.4162572939344291	5	S. DenseNet
530	2.427563249635955	5	S. DenseNet
531	1.999519908578679	5	S. DenseNet
532	1.9907577525878704	5	S. DenseNet
533	2.7683317725168175	5	S. DenseNet
534	1.284249651860761	5	S. DenseNet
535	2.7044171471511413	5	S. DenseNet
536	1.0026114790035159	5	S. DenseNet
537	1.8724449716833163	5	S. DenseNet
538	2.094654295574469	5	S. DenseNet
539	13.658265691938174	5	S. DenseNet
540	35.10859554926731	5	S. DenseNet
541	21.003481761609535	5	S. DenseNet
542	9.822083296560203	5	S. DenseNet
543	5.597878190798706	5	S. DenseNet
544	7.849398871759179	5	S. DenseNet
545	0.19244967275486258	5	S. DenseNet
546	5.322776401060577	5	S. DenseNet
547	2.3617311074137457	5	S. DenseNet
548	7.349044123517625	5	S. DenseNet
549	5.468730835520108	5	S. DenseNet
550	61.36601803117239	5	S. DenseNet
551	44.41438207339318	5	S. DenseNet
552	5.848568265085834	5	S. DenseNet
553	6.192951303899883	5	S. DenseNet
554	37.58601564798172	5	S. DenseNet
555	40.45578775403646	5	S. DenseNet
556	48.812833762381835	5	S. DenseNet
557	54.69177285749568	5	S. DenseNet
558	36.510821607293266	5	S. DenseNet
559	30.04837651594024	5	S. DenseNet
560	11.090891261190468	5	S. DenseNet
561	6.017808703519753	5	S. DenseNet
562	8.058363145723748	5	S. DenseNet
563	4.416646829283051	5	S. DenseNet
564	4.791521602238669	5	S. DenseNet
565	1.7868989957480494	5	S. DenseNet
566	2.7638695210252524	5	S. DenseNet
567	0.914119486598751	5	S. DenseNet
568	1.5661820520748535	5	S. DenseNet
569	1.1728236385703503	5	S. DenseNet
570	1.2996823405224645	5	S. DenseNet
571	1.284818298528853	5	S. DenseNet
572	1.2221948541706653	5	S. DenseNet
573	1.6754880521726663	5	S. DenseNet
574	0.1205284937557261	5	S. DenseNet
575	1.3787706161095312	5	S. DenseNet
576	3.150818030204598	5	S. DenseNet
577	1.0442212312401222	5	S. DenseNet
578	4.880864342847314	5	S. DenseNet
579	6.6105847344644575	5	S. DenseNet
580	4.003307229170097	5	S. DenseNet
581	3.6185358382678854	5	S. DenseNet
582	4.00250313707041	5	S. DenseNet
583	1.8817734765152918	5	S. DenseNet
584	2.1769375513623075	5	S. DenseNet
585	2.0994366391322887	5	S. DenseNet
586	4.358808378965133	5	S. DenseNet
587	3.515441241707695	5	S. DenseNet
588	1.1067915496503267	5	S. DenseNet
589	2.6020090921064285	5	S. DenseNet
590	0.5756358041480416	5	S. DenseNet
591	0.9472985221786924	5	S. DenseNet
592	0.8505361351567581	5	S. DenseNet
593	2.69783619012833	5	S. DenseNet
594	0.7654622069290999	5	S. DenseNet
595	1.0727888244166757	5	S. DenseNet
596	5.930149366387138	5	S. DenseNet
597	2.2418984990600626	5	S. DenseNet
598	2.145144780274239	5	S. DenseNet
599	0.9726588335235667	5	S. DenseNet
600	0.6295171698362263	5	S. DenseNet
601	0.6222417586318333	5	S. DenseNet
602	3.0244080996754503	5	S. DenseNet
603	0.5812779079917947	5	S. DenseNet
604	2.729485568312882	5	S. DenseNet
605	3.7940680251082903	5	S. DenseNet
606	3.6694628061725956	5	S. DenseNet
607	3.971375484977023	5	S. DenseNet
608	0.8716229877981035	5	S. DenseNet
609	3.109368473827288	5	S. DenseNet
610	1.2163745237936974	5	S. DenseNet
611	1.4279768977255418	5	S. DenseNet
612	1.5974932956153003	5	S. DenseNet
613	0.18545706930428985	5	S. DenseNet
614	4.115059053633024	5	S. DenseNet
615	1.513354740393599	5	S. DenseNet
616	1.9038807361265904	5	S. DenseNet
617	1.0397061645460686	5	S. DenseNet
618	1.4430419394477203	5	S. DenseNet
619	1.4155451087622661	5	S. DenseNet
620	2.8801673109109123	5	S. DenseNet
621	6.565210508622372	5	S. DenseNet
622	3.329785210709279	5	S. DenseNet
623	3.2428483881492065	5	S. DenseNet
624	5.167930424499294	5	S. DenseNet
625	3.195703418406489	5	S. DenseNet
626	36.271286456842255	5	S. DenseNet
627	33.128293663838015	5	S. DenseNet
628	43.97280534984817	5	S. DenseNet
629	50.41835245737139	5	S. DenseNet
630	6.353348867651479	5	S. DenseNet
631	3.2785329622579162	5	S. DenseNet
632	4.400445508844142	5	S. DenseNet
633	3.932446619926381	5	S. DenseNet
634	5.452652230670844	5	S. DenseNet
635	4.50904540376042	5	S. DenseNet
636	2.960493821345164	5	S. DenseNet
637	1.6486432122105867	5	S. DenseNet
638	3.639107649475922	5	S. DenseNet
639	9.111615524397582	5	S. DenseNet
640	8.446400149579064	5	S. DenseNet
641	5.045066967844088	5	S. DenseNet
642	5.451221569856251	5	S. DenseNet
643	3.223991533046303	5	S. DenseNet
644	1.1267711871249044	5	S. DenseNet
645	2.1370058456166303	5	S. DenseNet
646	3.240396029486026	5	S. DenseNet
647	1.488505362664408	5	S. DenseNet
648	0.6901278641739195	5	S. DenseNet
649	1.9674821401769298	5	S. DenseNet
650	2.3554356552483906	5	S. DenseNet
651	1.4133073240674705	5	S. DenseNet
652	1.0058396079785892	5	S. DenseNet
653	0.3562547371943533	5	S. DenseNet
654	0.49045406844348316	5	S. DenseNet
655	0.24281147682471269	5	S. DenseNet
656	3.4569426914098313	5	S. DenseNet
657	6.434743156751969	5	S. DenseNet
658	4.523424213486625	5	S. DenseNet
659	3.3082650632710515	5	S. DenseNet
660	2.366317826339431	5	S. DenseNet
661	6.385547111332971	5	S. DenseNet
662	0.6178143864118615	5	S. DenseNet
663	2.1722154264267592	5	S. DenseNet
664	0.6380959208231939	5	S. DenseNet
665	0.6271425937502924	5	S. DenseNet
666	1.7003991480617846	5	S. DenseNet
667	1.1428368702433338	5	S. DenseNet
668	2.5925687409099396	5	S. DenseNet
669	1.7114181165433981	5	S. DenseNet
670	1.5703984234199977	5	S. DenseNet
671	3.79251167515967	5	S. DenseNet
672	1.6460077378415257	5	S. DenseNet
673	1.601117476624693	5	S. DenseNet
674	7.982902348814549	5	S. DenseNet
675	1.2001866301625648	5	S. DenseNet
676	0.39367299765701097	5	S. DenseNet
677	1.621943573858748	5	S. DenseNet
678	0.9744334506607846	5	S. DenseNet
679	1.0531801017052391	5	S. DenseNet
680	0.7591686087410797	5	S. DenseNet
681	0.639100274392136	5	S. DenseNet
682	0.4085396592597193	5	S. DenseNet
683	2.0685722233519876	5	S. DenseNet
684	1.2406590704207563	5	S. DenseNet
685	1.7736188456880704	5	S. DenseNet
686	1.6552194362778612	5	S. DenseNet
687	0.5647380532995989	5	S. DenseNet
688	0.9883900297474364	5	S. DenseNet
689	1.7214515330846	5	S. DenseNet
690	1.4821986074422229	5	S. DenseNet
691	1.8390455527450298	5	S. DenseNet
692	7.676245197432211	5	S. DenseNet
693	21.365977570309997	5	S. DenseNet
694	15.709123215601876	5	S. DenseNet
695	11.808147277800584	5	S. DenseNet
696	11.373952778106858	5	S. DenseNet
697	8.000272964087431	5	S. DenseNet
698	2.1633233993462664	5	S. DenseNet
699	1.3874296980526537	5	S. DenseNet
700	0.8171363662745651	5	S. DenseNet
701	0.8700201435196979	5	S. DenseNet
702	3.271062600814953	5	S. DenseNet
703	2.20956757062308	5	S. DenseNet
704	4.900443937546981	5	S. DenseNet
705	1.3967044264680393	5	S. DenseNet
706	1.1548818348912795	5	S. DenseNet
707	0.5441807082675828	5	S. DenseNet
708	0.5162732899866761	5	S. DenseNet
709	0.9300259173875814	5	S. DenseNet
710	0.4741092584405615	5	S. DenseNet
711	3.772551658925601	5	S. DenseNet
712	2.380298856774374	5	S. DenseNet
713	1.133051855779055	5	S. DenseNet
714	1.706662236520297	5	S. DenseNet
715	1.0635935988841412	5	S. DenseNet
716	2.9943516084413107	5	S. DenseNet
717	1.4477839716379794	5	S. DenseNet
718	1.059911021973461	5	S. DenseNet
719	2.7760674779211847	5	S. DenseNet
720	5.492988845806598	5	S. DenseNet
721	8.051010764491178	5	S. DenseNet
722	11.74958495955127	5	S. DenseNet
723	7.470622219659274	5	S. DenseNet
724	11.214127873009422	5	S. DenseNet
725	1.175370358212902	5	S. DenseNet
726	2.423882223168119	5	S. DenseNet
727	1.5481839478917372	5	S. DenseNet
728	2.8167512451281342	5	S. DenseNet
729	1.097429142839026	5	S. DenseNet
730	0.5102559535534733	5	S. DenseNet
731	4.777676719529821	5	S. DenseNet
732	5.166311129691775	5	S. DenseNet
733	3.412436892766669	5	S. DenseNet
734	3.256489196065281	5	S. DenseNet
735	5.780106361428144	5	S. DenseNet
736	3.6677151205729634	5	S. DenseNet
737	5.217827337174147	5	S. DenseNet
738	1.8013655377810935	5	S. DenseNet
739	0.9820787576958562	5	S. DenseNet
740	4.728141019118153	5	S. DenseNet
741	2.533579704731349	5	S. DenseNet
742	2.4308271124633505	5	S. DenseNet
743	2.4711972073923034	5	S. DenseNet
744	0.9837291967659056	5	S. DenseNet
745	1.2134122157500673	5	S. DenseNet
746	0.8529974541858215	5	S. DenseNet
747	20.12231326931634	5	S. DenseNet
748	19.0455944452556	5	S. DenseNet
749	12.150699449177475	5	S. DenseNet
750	7.220857799310587	5	S. DenseNet
751	8.831282942252518	5	S. DenseNet
752	3.297397541404215	5	S. DenseNet
753	3.376419773033101	5	S. DenseNet
754	1.2030125897130042	5	S. DenseNet
755	3.0630968125624185	5	S. DenseNet
756	1.0749414388565177	5	S. DenseNet
757	1.1728334250273773	5	S. DenseNet
758	1.960832050968003	5	S. DenseNet
759	0.38266075499570734	5	S. DenseNet
760	0.8582581752099068	5	S. DenseNet
761	1.294748006923478	5	S. DenseNet
762	1.3970036967345305	5	S. DenseNet
763	0.3759088954014235	5	S. DenseNet
764	4.673835304185491	5	S. DenseNet
765	8.996886953540287	5	S. DenseNet
766	5.240661993721985	5	S. DenseNet
767	5.422134538525922	5	S. DenseNet
768	5.209131247622862	5	S. DenseNet
769	5.486533932326413	5	S. DenseNet
770	2.791048976906261	5	S. DenseNet
771	1.46551797868213	5	S. DenseNet
772	2.1597582712385166	5	S. DenseNet
773	10.28449620316721	5	S. DenseNet
774	20.08273905433804	5	S. DenseNet
775	16.732838046220845	5	S. DenseNet
776	17.037878762510818	5	S. DenseNet
777	12.534777156490815	5	S. DenseNet
778	8.257986643805841	5	S. DenseNet
779	0.35204156873704257	5	S. DenseNet
780	3.56306112419883	5	S. DenseNet
781	3.5466586257060184	5	S. DenseNet
782	10.48945816319487	5	S. DenseNet
783	5.607377766578704	5	S. DenseNet
784	3.4667192710129746	5	S. DenseNet
785	1.9445520578049942	5	S. DenseNet
786	2.2543462640568728	5	S. DenseNet
787	1.9224315256312565	5	S. DenseNet
788	0.737696531536592	5	S. DenseNet
789	0.20295795866533656	5	S. DenseNet
790	1.9837159204494867	5	S. DenseNet
791	3.0387299023890333	5	S. DenseNet
792	1.325419614581543	5	S. DenseNet
793	1.0798869028097051	5	S. DenseNet
794	1.5914171325827149	5	S. DenseNet
795	0.3572392737391903	5	S. DenseNet
796	0.2769494843845284	5	S. DenseNet
797	0.7745531723141182	5	S. DenseNet
798	0.5753421306354436	5	S. DenseNet
799	0.6265822363773194	5	S. DenseNet
800	6.31399773039665	5	S. DenseNet
801	2.0108760829416408	5	S. DenseNet
802	3.237447419087064	5	S. DenseNet
803	5.33285305359981	5	S. DenseNet
804	5.471578642745255	5	S. DenseNet
805	1.9531897350590608	5	S. DenseNet
806	2.5620813665884805	5	S. DenseNet
807	2.1451720936806615	5	S. DenseNet
808	3.046411359547225	5	S. DenseNet
809	2.891190115632522	5	S. DenseNet
810	0.20919954363449908	5	S. DenseNet
811	2.919320061456461	5	S. DenseNet
812	5.311494100485394	5	S. DenseNet
813	2.988579440223174	5	S. DenseNet
814	8.183815503683538	5	S. DenseNet
815	2.469746716114714	5	S. DenseNet
816	0.9677375892133248	5	S. DenseNet
817	1.9303754121817411	5	S. DenseNet
818	2.587688794070216	5	S. DenseNet
819	1.5071374278221497	5	S. DenseNet
820	0.8092521142222231	5	S. DenseNet
821	3.053037041774019	5	S. DenseNet
822	2.3933274688665627	5	S. DenseNet
823	0.778783030670463	5	S. DenseNet
824	3.9507534392014714	5	S. DenseNet
825	1.4174851044310732	5	S. DenseNet
826	1.3979105558087375	5	S. DenseNet
827	1.999653618678354	5	S. DenseNet
828	96.7019038073808	5	S. DenseNet
829	88.45925241175367	5	S. DenseNet
830	61.451350498269576	5	S. DenseNet
831	51.011491692842235	5	S. DenseNet
832	53.408762281743414	5	S. DenseNet
833	4.819694376496265	5	S. DenseNet
834	1.8266363917676194	5	S. DenseNet
835	2.518762197030882	5	S. DenseNet
836	3.0945860718940263	5	S. DenseNet
837	1.5466503529324815	5	S. DenseNet
838	0.5593747879301628	5	S. DenseNet
839	1.5524458051942651	5	S. DenseNet
840	0.9004973170809976	5	S. DenseNet
841	0.5313813755616424	5	S. DenseNet
842	1.4703872308965837	5	S. DenseNet
843	2.383068138243548	5	S. DenseNet
844	2.4009591525424865	5	S. DenseNet
845	2.1947245922125926	5	S. DenseNet
846	4.747671848847466	5	S. DenseNet
847	2.5607224134573787	5	S. DenseNet
848	4.729815595671778	5	S. DenseNet
849	3.3879548278522686	5	S. DenseNet
850	3.691980998366158	5	S. DenseNet
851	2.5020826457736733	5	S. DenseNet
852	3.934747140697751	5	S. DenseNet
853	0.200051111334564	5	S. DenseNet
854	23.677228831771444	5	S. DenseNet
855	17.64081103059476	5	S. DenseNet
856	17.1371315842879	5	S. DenseNet
857	39.38197974648166	5	S. DenseNet
858	29.38955914603782	5	S. DenseNet
859	29.402276945627865	5	S. DenseNet
860	28.781021967101182	5	S. DenseNet
861	29.37159008283468	5	S. DenseNet
862	38.40307214101553	5	S. DenseNet
863	46.356679921473216	5	S. DenseNet
864	2.0909159361868097	5	S. DenseNet
865	1.581585567981848	5	S. DenseNet
866	1.4263086063783186	5	S. DenseNet
867	2.1927130686084837	5	S. DenseNet
868	1.188480585314482	5	S. DenseNet
869	2.1898421190046546	5	S. DenseNet
870	0.9216258057965069	5	S. DenseNet
871	0.8727455063106515	5	S. DenseNet
872	7.439847238504907	5	S. DenseNet
873	1.223219860010293	5	S. DenseNet
874	0.5908395898452252	5	S. DenseNet
875	4.381924715534196	5	S. DenseNet
876	2.908531530326536	5	S. DenseNet
877	2.793584401696809	5	S. DenseNet
878	1.2618877744384704	5	S. DenseNet
879	0.5921487883092146	5	S. DenseNet
880	1.3899564890610456	5	S. DenseNet
881	2.328236083882526	5	S. DenseNet
882	3.028756671513628	5	S. DenseNet
883	3.3583214369947663	5	S. DenseNet
884	4.145403736462523	5	S. DenseNet
885	1.1676335074473112	5	S. DenseNet
886	2.7679240026798717	5	S. DenseNet
887	0.0967894915150669	5	S. DenseNet
888	1.9377172922093109	5	S. DenseNet
889	1.3257433260270803	5	S. DenseNet
890	1.9971605663001404	5	S. DenseNet
891	4.022429777381726	5	S. DenseNet
892	1.206228828723101	5	S. DenseNet
893	1.777644726796873	5	S. DenseNet
894	1.7158568569901849	5	S. DenseNet
895	2.2473498036928428	5	S. DenseNet
896	1.7741877198609346	5	S. DenseNet
897	1.2332341172916224	5	S. DenseNet
898	1.2864218704333876	5	S. DenseNet
899	0.669721725749846	5	S. DenseNet
900	35.13081790993749	5	S. DenseNet
901	32.013423092414484	5	S. DenseNet
902	11.42681936871381	5	S. DenseNet
903	2.0063690877114255	5	S. DenseNet
904	8.519739141287394	5	S. DenseNet
905	35.349319872450245	5	S. DenseNet
906	36.677694458870846	5	S. DenseNet
907	43.677315554414356	5	S. DenseNet
908	47.456338417157404	5	S. DenseNet
909	2.867245639354857	5	S. DenseNet
910	1.627289436344392	5	S. DenseNet
911	2.3988223093390517	5	S. DenseNet
912	1.4479692907270956	5	S. DenseNet
913	2.6160884567478466	5	S. DenseNet
914	1.9600891435661463	5	S. DenseNet
915	1.267244518551389	5	S. DenseNet
916	0.8566505474790277	5	S. DenseNet
917	20.7374946656812	5	S. DenseNet
918	6.190776262657358	5	S. DenseNet
919	4.260739632203289	5	S. DenseNet
920	3.235504031077193	5	S. DenseNet
921	0.7810679966261758	5	S. DenseNet
922	2.355970444483362	5	S. DenseNet
923	0.42122274960444095	5	S. DenseNet
924	1.3491051667259049	5	S. DenseNet
925	1.6865297115324769	5	S. DenseNet
926	5.667176755602513	5	S. DenseNet
927	26.87098318474094	5	S. DenseNet
928	13.530666770621771	5	S. DenseNet
929	15.740186193319811	5	S. DenseNet
930	9.546813382664029	5	S. DenseNet
931	13.04641815346841	5	S. DenseNet
932	0.6012879245914446	5	S. DenseNet
933	2.5319941465109985	5	S. DenseNet
934	0.8389414950662067	5	S. DenseNet
935	3.725083482601463	5	S. DenseNet
936	2.2869222758450314	5	S. DenseNet
937	2.721031083168724	5	S. DenseNet
938	4.640122719579975	5	S. DenseNet
939	2.647828302767544	5	S. DenseNet
940	2.561610374067895	5	S. DenseNet
941	0.809427385539431	5	S. DenseNet
942	1.837191800890175	5	S. DenseNet
943	1.0965566045553754	5	S. DenseNet
944	1.3495974381686515	5	S. DenseNet
945	6.496405509734583	5	S. DenseNet
946	6.164925555628888	5	S. DenseNet
947	4.589704272524564	5	S. DenseNet
948	3.2690854393583986	5	S. DenseNet
949	4.164199375521923	5	S. DenseNet
950	4.46500162615042	5	S. DenseNet
951	2.4771251043299607	5	S. DenseNet
952	1.3237220688887197	5	S. DenseNet
953	0.3505145327618596	5	S. DenseNet
954	4.331640649757944	5	S. DenseNet
955	3.7925509546848906	5	S. DenseNet
956	2.241590934609217	5	S. DenseNet
957	4.833519869191863	5	S. DenseNet
958	2.008166152830701	5	S. DenseNet
959	1.1933890615012304	5	S. DenseNet
960	1.4241264832102367	5	S. DenseNet
961	0.8768587301077844	5	S. DenseNet
962	2.3357690424997246	5	S. DenseNet
963	2.7120905363480965	5	S. DenseNet
964	2.182951981648177	5	S. DenseNet
965	2.6731319912892877	5	S. DenseNet
966	0.9006904469659073	5	S. DenseNet
967	1.098398339406475	5	S. DenseNet
968	0.5484502386802752	5	S. DenseNet
969	1.6443590362678238	5	S. DenseNet
970	0.24151469611097826	5	S. DenseNet
971	1.3534271095023755	5	S. DenseNet
972	2.869336863063642	5	S. DenseNet
973	4.1516210894132355	5	S. DenseNet
974	4.767734222459026	5	S. DenseNet
975	4.599300154117835	5	S. DenseNet
976	3.27023108608491	5	S. DenseNet
977	0.926946823895637	5	S. DenseNet
978	1.2516914414383262	5	S. DenseNet
979	0.6942905631484885	5	S. DenseNet
980	1.6674126055378107	5	S. DenseNet
981	3.213417845949053	5	S. DenseNet
982	1.1842387593908636	5	S. DenseNet
983	4.058975910043186	5	S. DenseNet
984	3.39079933569811	5	S. DenseNet
985	3.6790462365285985	5	S. DenseNet
986	1.7212693835281414	5	S. DenseNet
987	1.4121298418008579	5	S. DenseNet
988	0.9627174995745714	5	S. DenseNet
989	9.592270672854372	5	S. DenseNet
990	0.6865079407498699	5	S. DenseNet
991	1.4191420386754139	5	S. DenseNet
992	4.78585474216721	5	S. DenseNet
993	2.7180013515385837	5	S. DenseNet
994	3.8710383910148503	5	S. DenseNet
995	4.801075694352043	5	S. DenseNet
996	11.389454507239549	5	S. DenseNet
997	10.96561092792468	5	S. DenseNet
998	9.370881340299677	5	S. DenseNet
999	1.2005111905539434	5	S. DenseNet
1000	0.6192218178233748	5	S. DenseNet
1001	5.682119429161343	5	S. DenseNet
1002	3.4259895830185316	5	S. DenseNet
1003	4.390708602067194	5	S. DenseNet
1004	2.6366970778675483	5	S. DenseNet
1005	1.8219169549926124	5	S. DenseNet
1006	0.4277463593689452	5	S. DenseNet
1007	1.9706328661111219	5	S. DenseNet
1008	20.878358690433576	5	S. DenseNet
1009	18.43117579258613	5	S. DenseNet
1010	9.59651401185808	5	S. DenseNet
1011	6.946058386377814	5	S. DenseNet
1012	6.162998753109209	5	S. DenseNet
1013	5.6634803555795115	5	S. DenseNet
1014	1.2834523900645787	5	S. DenseNet
1015	3.0801722284079043	5	S. DenseNet
1016	1.8729225776756595	5	S. DenseNet
1017	2.4802939947243545	5	S. DenseNet
1018	3.0444339004307457	5	S. DenseNet
1019	6.467744144436658	5	S. DenseNet
1020	3.44018438208518	5	S. DenseNet
1021	3.2627334983944762	5	S. DenseNet
1022	1.951023939888332	5	S. DenseNet
1023	2.2791475902965432	5	S. DenseNet
1024	0.5406451828650275	5	S. DenseNet
1025	5.686168172224731	5	S. DenseNet
1026	2.8519561356612053	5	S. DenseNet
1027	3.0464922081403536	5	S. DenseNet
1028	4.463523854183774	5	S. DenseNet
1029	1.6139603928056137	5	S. DenseNet
1030	3.3096734917314383	5	S. DenseNet
1031	3.7176801625535623	5	S. DenseNet
1032	2.1590140799886335	5	S. DenseNet
1033	2.6755421353146667	5	S. DenseNet
1034	7.753834287679117	5	S. DenseNet
1035	0.5994824611257048	5	S. DenseNet
1036	1.827164756501471	5	S. DenseNet
1037	3.6792719994699583	5	S. DenseNet
1038	0.640948901694666	5	S. DenseNet
1039	0.5398117264904172	5	S. DenseNet
1040	1.2803822092576602	5	S. DenseNet
1041	0.6755121429619299	5	S. DenseNet
1042	1.4784802085579212	5	S. DenseNet
1043	1.9460147783175905	5	S. DenseNet
1044	2.9029508674797686	5	S. DenseNet
1045	2.293482627809815	5	S. DenseNet
1046	2.332661699148001	5	S. DenseNet
1047	1.9225152539396917	5	S. DenseNet
1048	2.2852151652341237	5	S. DenseNet
1049	0.37099494908848235	5	S. DenseNet
1050	1.1506619670598295	5	S. DenseNet
1051	1.3027497890965563	5	S. DenseNet
1052	5.650606738139083	5	S. DenseNet
1053	1.3807864580764164	5	S. DenseNet
1054	0.32635805867985357	5	S. DenseNet
1055	4.561736075539807	5	S. DenseNet
1056	2.5660328936546613	5	S. DenseNet
1057	2.2120270690696926	5	S. DenseNet
1058	2.1031947701112474	5	S. DenseNet
1059	1.1859642078827783	5	S. DenseNet
1060	1.1003480930638618	5	S. DenseNet
1061	4.933662208057873	5	S. DenseNet
1062	7.411041133091586	5	S. DenseNet
1063	7.724963094179229	5	S. DenseNet
1064	7.063919112230494	5	S. DenseNet
1065	4.784217543537095	5	S. DenseNet
1066	4.3815688530688135	5	S. DenseNet
1067	5.660617038033251	5	S. DenseNet
1068	2.9448458829699438	5	S. DenseNet
1069	1.8711109599366313	5	S. DenseNet
1070	3.2465939317982975	5	S. DenseNet
1071	2.6311133303557925	5	S. DenseNet
1072	2.204880443287126	5	S. DenseNet
1073	3.7282649505261247	5	S. DenseNet
1074	2.687903782484581	5	S. DenseNet
1075	2.0766726129950364	5	S. DenseNet
1076	4.049612763662792	5	S. DenseNet
1077	3.8072452712447635	5	S. DenseNet
1078	0.7498545536038504	5	S. DenseNet
1079	11.032573900127787	5	S. DenseNet
1080	19.975893728251677	5	S. DenseNet
1081	20.475386034753328	5	S. DenseNet
1082	13.44716563398307	5	S. DenseNet
1083	7.797750616872082	5	S. DenseNet
1084	9.768459804349407	5	S. DenseNet
1085	1.4931052881218083	5	S. DenseNet
1086	1.3204562751164872	5	S. DenseNet
1087	1.8915985414675847	5	S. DenseNet
1088	0.24565301435240408	5	S. DenseNet
1089	5.156070475554532	5	S. DenseNet
1090	3.181353090295721	5	S. DenseNet
1091	3.619251820352895	5	S. DenseNet
1092	4.931791859929625	5	S. DenseNet
1093	1.8601912212778104	5	S. DenseNet
1094	2.72658821464447	5	S. DenseNet
1095	2.790161330449724	5	S. DenseNet
1096	2.831763145814095	5	S. DenseNet
1097	1.5531364807369752	5	S. DenseNet
1098	3.2630801192373404	5	S. DenseNet
1099	3.798373034201094	5	S. DenseNet
1100	2.9260614856674896	5	S. DenseNet
1101	3.089126683375269	5	S. DenseNet
1102	7.944420337518804	5	S. DenseNet
1103	2.10322038771397	5	S. DenseNet
1104	1.9151609638602536	5	S. DenseNet
1105	1.1875995383756797	5	S. DenseNet
1106	5.565496613642068	5	S. DenseNet
1107	4.789704605391489	5	S. DenseNet
1108	4.349878122935761	5	S. DenseNet
1109	3.915223774166139	5	S. DenseNet
1110	2.397888606575629	5	S. DenseNet
1111	3.7465003876100305	5	S. DenseNet
1112	1.7545723924375145	5	S. DenseNet
1113	1.2163886512470041	5	S. DenseNet
1114	1.899949329372353	5	S. DenseNet
1115	1.0073789785298242	5	S. DenseNet
1116	8.286695967118032	5	S. DenseNet
1117	8.649420737055845	5	S. DenseNet
1118	7.21337081384696	5	S. DenseNet
1119	4.772327423208272	5	S. DenseNet
1120	4.415529536565869	5	S. DenseNet
1121	0.7350337713246264	5	S. DenseNet
1122	1.9895164613464864	5	S. DenseNet
1123	1.9145819548853427	5	S. DenseNet
1124	2.040624514918379	5	S. DenseNet
1125	2.963439812667674	5	S. DenseNet
1126	0.8962238714152579	5	S. DenseNet
1127	4.576160609903748	5	S. DenseNet
1128	2.0168828302121513	5	S. DenseNet
1129	1.2210824425926674	5	S. DenseNet
1130	0.842558925953167	5	S. DenseNet
1131	2.8596464519643656	5	S. DenseNet
1132	1.3041569205013506	5	S. DenseNet
1133	2.578947200957544	5	S. DenseNet
1134	21.860326885564188	5	S. DenseNet
1135	17.428937052369374	5	S. DenseNet
1136	10.44360673647222	5	S. DenseNet
1137	7.242390283460225	5	S. DenseNet
1138	7.979493323149473	5	S. DenseNet
1139	2.2035193893905514	5	S. DenseNet
1140	4.041275963557402	5	S. DenseNet
1141	0.9672146225341307	5	S. DenseNet
1142	0.35517502282891905	5	S. DenseNet
1143	4.889633679282648	5	S. DenseNet
1144	68.31705004487826	5	S. DenseNet
1145	4.055841167429902	5	S. DenseNet
1146	6.6563530649682985	5	S. DenseNet
1147	1.2225901047145997	5	S. DenseNet
1148	2.7066873542882557	5	S. DenseNet
1149	3.912602448646026	5	S. DenseNet
1150	1.9565689785567426	5	S. DenseNet
1151	1.0258679593302693	5	S. DenseNet
1152	13.822291021338938	5	S. DenseNet
1153	12.412284199871067	5	S. DenseNet
1154	2.185093033799788	5	S. DenseNet
1155	4.2693318261501085	5	S. DenseNet
1156	5.145013184178943	5	S. DenseNet
1157	1.8667335832990963	5	S. DenseNet
1158	3.716682251936433	5	S. DenseNet
1159	3.27795507080782	5	S. DenseNet
1160	0.8636293807577251	5	S. DenseNet
1161	10.356932875960906	5	S. DenseNet
1162	1.6670992337771282	5	S. DenseNet
1163	1.148657466345794	5	S. DenseNet
1164	1.141388123939716	5	S. DenseNet
1165	1.9113165680247666	5	S. DenseNet
1166	1.3534402173165068	5	S. DenseNet
1167	1.0655814158142587	5	S. DenseNet
1168	0.7623213427389879	5	S. DenseNet
1169	1.4128886612833527	5	S. DenseNet
1170	5.954861683623114	5	S. DenseNet
1171	2.3366156152240394	5	S. DenseNet
1172	4.326027315253543	5	S. DenseNet
1173	2.722717996683388	5	S. DenseNet
1174	5.736745297570907	5	S. DenseNet
1175	2.020552611677688	5	S. DenseNet
1176	2.412694456889985	5	S. DenseNet
1177	0.6721358952909188	5	S. DenseNet
1178	1.6905051557417503	5	S. DenseNet
1179	0.6545887848131369	5	S. DenseNet
1180	0.9621986471619001	5	S. DenseNet
1181	3.7867954565793966	5	S. DenseNet
1182	1.2702206519910653	5	S. DenseNet
1183	1.1120535079252432	5	S. DenseNet
1184	1.9007779026640352	5	S. DenseNet
1185	1.0067963407676774	5	S. DenseNet
1186	1.7022642702944826	5	S. DenseNet
1187	5.41859183408855	5	S. DenseNet
1188	4.99301661763315	5	S. DenseNet
1189	1.077584858403241	5	S. DenseNet
1190	2.627998448094598	5	S. DenseNet
1191	1.0473244809816058	5	S. DenseNet
1192	3.0344222466486017	5	S. DenseNet
1193	0.44598869863631196	5	S. DenseNet
1194	0.6727865178123636	5	S. DenseNet
1195	1.2725829577155328	5	S. DenseNet
1196	3.1406319874137463	5	S. DenseNet
1197	1.9693528729299927	5	S. DenseNet
1198	0.6126076738097468	5	S. DenseNet
1199	2.0379034508991993	5	S. DenseNet
1200	1.7962152102399886	5	S. DenseNet
1201	1.4143855524820632	5	S. DenseNet
1202	1.0312040979586545	5	S. DenseNet
1203	1.1964349952389233	5	S. DenseNet
1204	0.9228546991150003	5	S. DenseNet
1205	2.885821021574505	5	S. DenseNet
1206	2.660411680068659	5	S. DenseNet
1207	0.8530157873734265	5	S. DenseNet
1208	1.6821668446398568	5	S. DenseNet
1209	1.955721586249554	5	S. DenseNet
1210	1.2663149674779217	5	S. DenseNet
1211	0.4933288020147224	5	S. DenseNet
1212	0.15768722064509944	5	S. DenseNet
1213	1.5181418976986087	5	S. DenseNet
1214	3.4839162253248745	5	S. DenseNet
1215	2.1703868482350694	5	S. DenseNet
1216	0.7469097677552586	5	S. DenseNet
1217	2.5603701070636986	5	S. DenseNet
1218	1.103521957778956	5	S. DenseNet
1219	1.701055441144776	5	S. DenseNet
1220	1.3613364548898788	5	S. DenseNet
1221	1.8072804290487532	5	S. DenseNet
1222	1.7544221187405082	5	S. DenseNet
1223	3.1570634548696175	5	S. DenseNet
1224	13.096364699848447	5	S. DenseNet
1225	10.229064350187599	5	S. DenseNet
1226	7.675174600094836	5	S. DenseNet
1227	6.5229976345250105	5	S. DenseNet
1228	6.201461538385303	5	S. DenseNet
1229	3.0217386315290757	5	S. DenseNet
1230	1.6220237831122375	5	S. DenseNet
1231	2.772943854740851	5	S. DenseNet
1232	15.747464611051125	5	S. DenseNet
1233	10.077776035978454	5	S. DenseNet
1234	6.20674359539992	5	S. DenseNet
1235	3.5858784865252935	5	S. DenseNet
1236	2.5806905214073335	5	S. DenseNet
1237	6.712986209095573	5	S. DenseNet
1238	2.579900094285324	5	S. DenseNet
1239	1.4724606812562662	5	S. DenseNet
1240	1.5708330798464385	5	S. DenseNet
1241	4.204241359708612	5	S. DenseNet
1242	28.229382772923277	5	S. DenseNet
1243	8.821113471310001	5	S. DenseNet
1244	5.910067632603711	5	S. DenseNet
1245	5.765161078620138	5	S. DenseNet
1246	4.664544741018218	5	S. DenseNet
1247	1.6823658393629877	5	S. DenseNet
1248	2.6776914953558	5	S. DenseNet
1249	2.4897010339437875	5	S. DenseNet
1250	2.219583551158066	5	S. DenseNet
1251	67.35137669873954	5	S. DenseNet
1252	57.181423241888865	5	S. DenseNet
1253	48.29073394438779	5	S. DenseNet
1254	3.4627357786511324	5	S. DenseNet
1255	39.35495866263454	5	S. DenseNet
1256	28.509378508882595	5	S. DenseNet
1257	20.661492721467784	5	S. DenseNet
1258	36.44014365344743	5	S. DenseNet
1259	46.834708337549316	5	S. DenseNet
1260	3.4408309074337535	5	S. DenseNet
1261	2.6484653069716155	5	S. DenseNet
1262	5.1395056942856225	5	S. DenseNet
1263	3.010235555420153	5	S. DenseNet
1264	3.8034498937886227	5	S. DenseNet
1265	1.2476470421107584	5	S. DenseNet
1266	0.5070572274406746	5	S. DenseNet
1267	1.6348954017909152	5	S. DenseNet
1268	3.296410682404534	5	S. DenseNet
1269	31.980406815735787	5	S. DenseNet
1270	26.671642722019808	5	S. DenseNet
1271	25.005352907767307	5	S. DenseNet
1272	27.25456632430593	5	S. DenseNet
1273	26.00865727268419	5	S. DenseNet
1274	5.5423579536498355	5	S. DenseNet
1275	7.781214827741182	5	S. DenseNet
1276	4.760465627056519	5	S. DenseNet
1277	1.448892518308116	5	S. DenseNet
1278	5.242249240791007	5	S. DenseNet
1279	2.3819033982965623	5	S. DenseNet
1280	0.3476629264055291	5	S. DenseNet
1281	2.445079768905742	5	S. DenseNet
1282	3.7262472413186054	5	S. DenseNet
1283	0.9031971020419466	5	S. DenseNet
1284	0.7762932539841857	5	S. DenseNet
1285	0.2523676221895312	5	S. DenseNet
1286	4.7157312134367775	5	S. DenseNet
1287	4.6004794867992675	5	S. DenseNet
1288	3.7524330599889524	5	S. DenseNet
1289	5.802794115546522	5	S. DenseNet
1290	5.878492266479777	5	S. DenseNet
1291	6.747326844351135	5	S. DenseNet
1292	2.8042884758781597	5	S. DenseNet
1293	5.618283922334423	5	S. DenseNet
1294	5.338372993940134	5	S. DenseNet
1295	17.230816225043945	5	S. DenseNet
1296	1.9454891501124352	5	S. DenseNet
1297	1.3504003638512085	5	S. DenseNet
1298	3.859076698589151	5	S. DenseNet
1299	3.5381396827521976	5	S. DenseNet
1300	2.27903973741534	5	S. DenseNet
1301	2.8081387520782912	5	S. DenseNet
1302	1.1049059099573402	5	S. DenseNet
1303	1.5597448084452672	5	S. DenseNet
1304	0.6990209657008697	5	S. DenseNet
1305	0.9713779732039765	5	S. DenseNet
1306	2.263201792239895	5	S. DenseNet
1307	3.3394494756917004	5	S. DenseNet
1308	2.6170879216314344	5	S. DenseNet
1309	3.4984251124376495	5	S. DenseNet
1310	1.25082002327045	5	S. DenseNet
1311	0.4124724169705723	5	S. DenseNet
1312	1.7713171081358168	5	S. DenseNet
1313	2.3275559337377922	5	S. DenseNet
1314	6.641767076944811	5	S. DenseNet
1315	2.016152504020089	5	S. DenseNet
1316	0.9762372843141671	5	S. DenseNet
1317	1.296859493740397	5	S. DenseNet
1318	0.9274317121020582	5	S. DenseNet
1319	0.3753680362529036	5	S. DenseNet
1320	1.808399192892239	5	S. DenseNet
1321	1.8282877586917439	5	S. DenseNet
1322	3.791754651880717	5	S. DenseNet
1323	3.945961449608735	5	S. DenseNet
1324	2.6515160245276475	5	S. DenseNet
1325	3.5901344485692763	5	S. DenseNet
1326	0.8139429216976096	5	S. DenseNet
1327	1.4994586722583667	5	S. DenseNet
1328	2.1330059874828367	5	S. DenseNet
1329	0.9937510794665475	5	S. DenseNet
1330	2.137291412170695	5	S. DenseNet
1331	4.37671333215066	5	S. DenseNet
1332	22.75537406164234	5	S. DenseNet
1333	20.70823386407618	5	S. DenseNet
1334	13.86015105905829	5	S. DenseNet
1335	14.25020561922154	5	S. DenseNet
1336	10.939276691198947	5	S. DenseNet
1337	2.4705370228349732	5	S. DenseNet
1338	2.6680895388581805	5	S. DenseNet
1339	1.8972446966387622	5	S. DenseNet
1340	2.453141796826046	5	S. DenseNet
1341	1.2394415918556638	5	S. DenseNet
1342	0.4999189688125028	5	S. DenseNet
1343	4.1084016416119615	5	S. DenseNet
1344	3.0295115212873793	5	S. DenseNet
1345	1.1863787813812658	5	S. DenseNet
1346	2.1223682132754305	5	S. DenseNet
1347	3.0894734535221797	5	S. DenseNet
1348	1.9916308370878857	5	S. DenseNet
1349	13.714350399648431	5	S. DenseNet
1350	18.12299940332378	5	S. DenseNet
1351	13.824285056143214	5	S. DenseNet
1352	6.050891567854555	5	S. DenseNet
1353	2.7310564577526604	5	S. DenseNet
1354	4.58048535566621	5	S. DenseNet
1355	36.146692193612665	5	S. DenseNet
1356	33.856969200378146	5	S. DenseNet
1357	35.832489660532325	5	S. DenseNet
1358	30.14614831435962	5	S. DenseNet
1359	1.847400680588748	5	S. DenseNet
1360	3.2072611989812407	5	S. DenseNet
1361	3.226384432106589	5	S. DenseNet
1362	1.5965128377713358	5	S. DenseNet
1363	2.076136809930904	5	S. DenseNet
1364	0.9016710428215277	5	S. DenseNet
1365	1.8432313016817485	5	S. DenseNet
1366	1.340942922562337	5	S. DenseNet
1367	2.077564070051891	5	S. DenseNet
1368	6.595952440721364	5	S. DenseNet
1369	1.4957928794533497	5	S. DenseNet
1370	2.329600814819605	5	S. DenseNet
1371	1.2603232151425996	5	S. DenseNet
1372	0.841074189556679	5	S. DenseNet
1373	1.1826140547830601	5	S. DenseNet
1374	2.5915317704046936	5	S. DenseNet
1375	2.7881104257164067	5	S. DenseNet
1376	11.611733585288505	5	S. DenseNet
1377	14.52132523936986	5	S. DenseNet
1378	11.500594560549713	5	S. DenseNet
1379	3.0148679905223883	5	S. DenseNet
1380	0.9793823820678407	5	S. DenseNet
1381	2.3882307555452793	5	S. DenseNet
1382	1.3409564773645541	5	S. DenseNet
1383	1.8012077984371542	5	S. DenseNet
1384	1.922347102671927	5	S. DenseNet
1385	6.5363782258667955	5	S. DenseNet
1386	13.594859664091281	5	S. DenseNet
1387	16.267044981963032	5	S. DenseNet
1388	11.228688837617682	5	S. DenseNet
1389	10.944408930612893	5	S. DenseNet
1390	15.887553793935231	5	S. DenseNet
1391	1.8665639224626713	5	S. DenseNet
1392	2.1079755235511306	5	S. DenseNet
1393	4.328269356228766	5	S. DenseNet
1394	1.9854319902179693	5	S. DenseNet
1395	3.8805673265222884	5	S. DenseNet
1396	3.7382347377374088	5	S. DenseNet
1397	1.8633177144784563	5	S. DenseNet
1398	2.1059323537980994	5	S. DenseNet
1399	2.2225433437210063	5	S. DenseNet
1400	0.8800458710524448	5	S. DenseNet
1401	0.8131338507983654	5	S. DenseNet
1402	1.0034953197416414	5	S. DenseNet
1403	7.669289855737893	5	S. DenseNet
1404	1.7691625127091088	5	S. DenseNet
1405	0.10042378357211018	5	S. DenseNet
1406	4.754498300231739	5	S. DenseNet
1407	3.4431496155319836	5	S. DenseNet
1408	2.8671243862141473	5	S. DenseNet
1409	1.2897239757004713	5	S. DenseNet
1410	0.8677915363722974	5	S. DenseNet
1411	1.0400023341150426	5	S. DenseNet
1412	1.2412882590940957	5	S. DenseNet
1413	0.40133120041627174	5	S. DenseNet
1414	1.768505884270153	5	S. DenseNet
1415	2.7070059958500066	5	S. DenseNet
1416	1.0975186117485378	5	S. DenseNet
1417	1.9257891024911187	5	S. DenseNet
1418	1.768668031350784	5	S. DenseNet
1419	2.729281126820266	5	S. DenseNet
1420	1.0715892002559233	5	S. DenseNet
1421	1.4467286605095049	5	S. DenseNet
1422	2.5088013168236936	5	S. DenseNet
1423	3.5921563251071227	5	S. DenseNet
1424	2.189100475114102	5	S. DenseNet
1425	2.1341254453084315	5	S. DenseNet
1426	0.7709022423994382	5	S. DenseNet
1427	1.0623896663311057	5	S. DenseNet
1428	0.5464740152155184	5	S. DenseNet
1429	1.2437668399528605	5	S. DenseNet
1430	0.7142504938856471	5	S. DenseNet
1431	3.7322710833133153	5	S. DenseNet
1432	0.5416175017104228	5	S. DenseNet
1433	3.5137024126753182	5	S. DenseNet
1434	0.7554688070346465	5	S. DenseNet
1435	0.6329594860955332	5	S. DenseNet
1436	1.3914192213970147	5	S. DenseNet
1437	1.5829038079191617	5	S. DenseNet
1438	1.1670882889735381	5	S. DenseNet
1439	3.3274411313077317	5	S. DenseNet
1440	5.857283242633275	5	S. DenseNet
1441	1.0488499026373117	5	S. DenseNet
1442	1.0042882955013634	5	S. DenseNet
1443	2.3764179706335447	5	S. DenseNet
1444	0.6299761486378984	5	S. DenseNet
1445	1.3712750167531322	5	S. DenseNet
1446	2.5313672125001725	5	S. DenseNet
1447	1.0239909613139333	5	S. DenseNet
1448	1.7565879512885172	5	S. DenseNet
1449	2.1131967116252026	5	S. DenseNet
1450	1.9687809962722334	5	S. DenseNet
1451	2.6397578480668034	5	S. DenseNet
1452	2.8343582772299283	5	S. DenseNet
1453	4.922985216440862	5	S. DenseNet
1454	2.0889852292528466	5	S. DenseNet
1455	1.182377293770802	5	S. DenseNet
1456	2.482103455735755	5	S. DenseNet
1457	9.062658449215844	5	S. DenseNet
1458	3.4008564800302867	5	S. DenseNet
1459	2.2197647880223976	5	S. DenseNet
1460	4.4719384431622675	5	S. DenseNet
1461	0.5947283769926008	5	S. DenseNet
1462	1.4737456840664438	5	S. DenseNet
1463	3.6686657943487853	5	S. DenseNet
1464	1.9523645320231695	5	S. DenseNet
1465	1.3647880521727926	5	S. DenseNet
1466	5.257422935068894	5	S. DenseNet
1467	2.0150645238018923	5	S. DenseNet
1468	1.9967309123987158	5	S. DenseNet
1469	3.625566085744353	5	S. DenseNet
1470	2.4948067035377335	5	S. DenseNet
1471	0.9678080736860128	5	S. DenseNet
1472	0.5866939988790297	5	S. DenseNet
1473	0.830445947006794	5	S. DenseNet
1474	0.7187431256365158	5	S. DenseNet
1475	2.633823782386945	5	S. DenseNet
1476	1.6082643987528433	5	S. DenseNet
1477	0.9188127388113897	5	S. DenseNet
1478	4.147608596559736	5	S. DenseNet
1479	2.7912245695934392	5	S. DenseNet
1480	2.4778477744281946	5	S. DenseNet
1481	2.4332036845030505	5	S. DenseNet
1482	2.1435983420957463	5	S. DenseNet
1483	2.644166812471468	5	S. DenseNet
1484	2.1175178492096665	5	S. DenseNet
1485	5.8606699156381055	5	S. DenseNet
1486	0.8575374969238718	5	S. DenseNet
1487	0.6268295510678622	5	S. DenseNet
1488	1.068435254422608	5	S. DenseNet
1489	0.6999544766444762	5	S. DenseNet
1490	3.8336237898607166	5	S. DenseNet
1491	6.209652970644881	5	S. DenseNet
1492	1.3509355965415637	5	S. DenseNet
1493	1.4366732132515256	5	S. DenseNet
1494	0.5235342929131129	5	S. DenseNet
1495	1.1378694955455373	5	S. DenseNet
1496	2.923106066704622	5	S. DenseNet
1497	2.695211421432144	5	S. DenseNet
1498	2.7385872237541062	5	S. DenseNet
1499	3.254686957849601	5	S. DenseNet
1500	0.8786254009146653	5	S. DenseNet
1501	2.533919568154808	5	S. DenseNet
1502	4.693637197041739	5	S. DenseNet
1503	3.136830755747234	5	S. DenseNet
1504	2.08536055183272	5	S. DenseNet
1505	1.583282506843039	5	S. DenseNet
1506	2.154070506116767	5	S. DenseNet
1507	2.6151943408761804	5	S. DenseNet
1508	1.7914759102097908	5	S. DenseNet
1509	1.3138412596998952	5	S. DenseNet
1510	1.2535086500400108	5	S. DenseNet
1511	1.7708007328981785	5	S. DenseNet
1512	3.1112809728727537	5	S. DenseNet
1513	0.7045120225145551	5	S. DenseNet
1514	2.566611469911738	5	S. DenseNet
1515	0.3990585674658229	5	S. DenseNet
1516	0.2699462418002954	5	S. DenseNet
1517	0.9842751026602541	5	S. DenseNet
1518	1.1605680739751154	5	S. DenseNet
1519	0.45018849648908976	5	S. DenseNet
1520	13.338608926003436	5	S. DenseNet
1521	20.51386482126827	5	S. DenseNet
1522	18.211116145540153	5	S. DenseNet
1523	13.118361556975017	5	S. DenseNet
1524	9.356045164306636	5	S. DenseNet
1525	12.362288940563745	5	S. DenseNet
1526	0.8096620576272026	5	S. DenseNet
1527	2.3805373727308945	5	S. DenseNet
1528	0.7855242706902338	5	S. DenseNet
1529	0.8774294509350354	5	S. DenseNet
1530	2.3461212651662846	5	S. DenseNet
1531	1.9326746474887175	5	S. DenseNet
1532	2.9660775007898232	5	S. DenseNet
1533	2.295342721435556	5	S. DenseNet
1534	1.1334971788405008	5	S. DenseNet
1535	1.4729864038408276	5	S. DenseNet
1536	0.6783700288955021	5	S. DenseNet
1537	0.9621769178440012	5	S. DenseNet
1538	3.0174410902344704	5	S. DenseNet
1539	6.355658918076372	5	S. DenseNet
1540	5.711335270305827	5	S. DenseNet
1541	8.510016468139106	5	S. DenseNet
1542	8.616375059569828	5	S. DenseNet
1543	18.76620443058985	5	S. DenseNet
1544	4.633579507561362	5	S. DenseNet
1545	39.96352479790988	5	S. DenseNet
1546	4.06275755600055	5	S. DenseNet
1547	3.116121405762186	5	S. DenseNet
1548	4.528701524173771	5	S. DenseNet
1549	3.0970213583378303	5	S. DenseNet
1550	2.256384176764121	5	S. DenseNet
1551	2.5551236399428707	5	S. DenseNet
1552	3.323655006516419	5	S. DenseNet
1553	2.4675019378028202	5	S. DenseNet
1554	2.2933992851908904	5	S. DenseNet
1555	0.9285777961511469	5	S. DenseNet
1556	2.6687120979832804	5	S. DenseNet
1557	6.082701281486152	5	S. DenseNet
1558	1.2067179970267192	5	S. DenseNet
1559	5.748067365429013	5	S. DenseNet
1560	0.8527995114437681	5	S. DenseNet
1561	2.2083925077474937	5	S. DenseNet
1562	2.106307121785635	5	S. DenseNet
1563	0.751803257960308	5	S. DenseNet
1564	1.7468766913392622	5	S. DenseNet
1565	1.6263203991447055	5	S. DenseNet
1566	6.636690388776462	5	S. DenseNet
1567	3.4002852956554617	5	S. DenseNet
1568	2.5401613232857074	5	S. DenseNet
1569	3.223437568141176	5	S. DenseNet
1570	2.230069387261562	5	S. DenseNet
1571	2.005831971586532	5	S. DenseNet
1572	2.5121639818696155	5	S. DenseNet
1573	1.4932986122498377	5	S. DenseNet
1574	1.381893326961141	5	S. DenseNet
1575	0.748488430902528	5	S. DenseNet
1576	1.2176931847834152	5	S. DenseNet
1577	1.2850756633163842	5	S. DenseNet
1578	1.3183653817878485	5	S. DenseNet
1579	2.0220738461006884	5	S. DenseNet
1580	0.8646839471323507	5	S. DenseNet
1581	0.5534862701884943	5	S. DenseNet
1582	0.6507981048340166	5	S. DenseNet
1583	0.6595118225764272	5	S. DenseNet
1584	3.410075175191793	5	S. DenseNet
1585	1.7326389471590669	5	S. DenseNet
1586	2.0483466332924127	5	S. DenseNet
1587	4.747849471415817	5	S. DenseNet
1588	0.9517488309896266	5	S. DenseNet
1589	1.9904528407860125	5	S. DenseNet
1590	0.40061735432200635	5	S. DenseNet
1591	2.0512458403581033	5	S. DenseNet
1592	8.080808840088947	5	S. DenseNet
1593	1.1939059781001806	5	S. DenseNet
1594	0.7705725367763044	5	S. DenseNet
1595	3.453685552497126	5	S. DenseNet
1596	1.0803636885634502	5	S. DenseNet
1597	2.199374982951721	5	S. DenseNet
1598	0.9137924390728565	5	S. DenseNet
1599	2.5614962170937745	5	S. DenseNet
1600	1.584115637073663	5	S. DenseNet
1601	4.196298558032911	5	S. DenseNet
1602	1.041055613044257	5	S. DenseNet
1603	0.835119822597671	5	S. DenseNet
1604	4.490983460407334	5	S. DenseNet
1605	3.955467815677638	5	S. DenseNet
1606	4.290475228283009	5	S. DenseNet
1607	2.6384693286867082	5	S. DenseNet
1608	1.7836275653915852	5	S. DenseNet
1609	3.2543302351981573	5	S. DenseNet
1610	2.5719379138869636	5	S. DenseNet
1611	4.042447026828305	5	S. DenseNet
1612	3.4909631614049808	5	S. DenseNet
1613	2.517680403649267	5	S. DenseNet
1614	2.8271562340419094	5	S. DenseNet
1615	2.2912883079388577	5	S. DenseNet
1616	2.884825015613192	5	S. DenseNet
1617	2.1020548399964074	5	S. DenseNet
1618	0.9743030808551241	5	S. DenseNet
1619	0.8177980163096427	5	S. DenseNet
1620	2.8356668098760465	5	S. DenseNet
1621	0.6836792017225518	5	S. DenseNet
1622	3.5433518221146105	5	S. DenseNet
1623	1.1084641103584654	5	S. DenseNet
1624	0.8392882207821345	5	S. DenseNet
1625	1.7503851613588166	5	S. DenseNet
1626	2.763495183842009	5	S. DenseNet
1627	1.8876497213632073	5	S. DenseNet
1628	5.754081338153465	5	S. DenseNet
1629	1.498460930504913	5	S. DenseNet
1630	1.6299998661222854	5	S. DenseNet
1631	3.691745638575371	5	S. DenseNet
1632	2.534234066281963	5	S. DenseNet
1633	3.086058537152751	5	S. DenseNet
1634	0.9109676397078766	5	S. DenseNet
1635	0.2509665074557113	5	S. DenseNet
1636	0.4961365013685425	5	S. DenseNet
1637	1.411158478391005	5	S. DenseNet
1638	1.4188136066656603	5	S. DenseNet
1639	2.319353433179236	5	S. DenseNet
1640	3.158700925774573	5	S. DenseNet
1641	1.3350430636452955	5	S. DenseNet
1642	1.720460822243977	5	S. DenseNet
1643	3.1018153128739607	5	S. DenseNet
1644	0.932711509618084	5	S. DenseNet
1645	0.5832738115809163	5	S. DenseNet
1646	2.2268999157422953	5	S. DenseNet
1647	3.671717049399088	5	S. DenseNet
1648	2.9124666517188706	5	S. DenseNet
1649	1.8442884609440051	5	S. DenseNet
1650	0.9831998219249505	5	S. DenseNet
1651	2.2145635609765706	5	S. DenseNet
1652	22.520881691566355	5	S. DenseNet
1653	19.27710846429045	5	S. DenseNet
1654	17.700506710140136	5	S. DenseNet
1655	27.13111872365542	5	S. DenseNet
1656	1.7931826750387516	5	S. DenseNet
1657	0.391836392010919	5	S. DenseNet
1658	4.134273999118948	5	S. DenseNet
1659	2.1787304151379665	5	S. DenseNet
1660	3.1438736692201266	5	S. DenseNet
1661	0.5380536760556192	5	S. DenseNet
1662	0.5984008499842658	5	S. DenseNet
1663	1.005926260275348	5	S. DenseNet
1664	1.5480679584249675	5	S. DenseNet
1665	3.653158535417256	5	S. DenseNet
1666	2.499871767136646	5	S. DenseNet
1667	4.1293129401109505	5	S. DenseNet
1668	0.9396743053744524	5	S. DenseNet
1669	3.5892342080274804	5	S. DenseNet
1670	1.516754819399232	5	S. DenseNet
1671	0.6045234378575531	5	S. DenseNet
1672	0.6031123174746044	5	S. DenseNet
1673	1.815224592883881	5	S. DenseNet
1674	0.8443747744047243	5	S. DenseNet
1675	0.926745083406357	5	S. DenseNet
1676	2.8517396995160187	5	S. DenseNet
1677	1.2528321390018593	5	S. DenseNet
1678	0.8654862407418374	5	S. DenseNet
1679	1.9606802329258022	5	S. DenseNet
1680	0.8762394061942302	5	S. DenseNet
1681	1.726182750490806	5	S. DenseNet
1682	7.609163345990048	5	S. DenseNet
1683	53.76601267859429	5	S. DenseNet
1684	43.12636285231908	5	S. DenseNet
1685	24.965616853300904	5	S. DenseNet
1686	17.14636672520542	5	S. DenseNet
1687	15.872002527995654	5	S. DenseNet
1688	37.092830002442255	5	S. DenseNet
1689	37.95945899071812	5	S. DenseNet
1690	48.24710958352078	5	S. DenseNet
1691	51.83108390282363	5	S. DenseNet
1692	0.38243789522120114	5	S. DenseNet
1693	0.5010505300335361	5	S. DenseNet
1694	4.298740834558279	5	S. DenseNet
1695	2.1518477260627646	5	S. DenseNet
1696	3.3912046948944647	5	S. DenseNet
1697	1.8599830999909217	5	S. DenseNet
1698	0.9080046287483885	5	S. DenseNet
1699	1.9830048632760626	5	S. DenseNet
1700	1.780010247141594	5	S. DenseNet
1701	16.550638058405347	5	S. DenseNet
1702	11.47748970899044	5	S. DenseNet
1703	7.995247211625794	5	S. DenseNet
1704	10.09864047998408	5	S. DenseNet
1705	5.840082410560255	5	S. DenseNet
1706	1.061252357859813	5	S. DenseNet
1707	1.0104266061489786	5	S. DenseNet
1708	1.575746016673008	5	S. DenseNet
1709	2.841879815688435	5	S. DenseNet
1710	7.651613039544306	5	S. DenseNet
1711	2.1089782946374025	5	S. DenseNet
1712	2.8170666304081697	5	S. DenseNet
1713	1.0088352448221856	5	S. DenseNet
1714	1.349711035224221	5	S. DenseNet
1715	4.971856276360437	5	S. DenseNet
1716	1.7298354631753634	5	S. DenseNet
1717	2.64395232357044	5	S. DenseNet
1718	2.5107649819259246	5	S. DenseNet
1719	8.288187646484706	5	S. DenseNet
1720	5.163251039338363	5	S. DenseNet
1721	6.7781254634023025	5	S. DenseNet
1722	1.9925793941360883	5	S. DenseNet
1723	5.402196023603665	5	S. DenseNet
1724	1.3148951034143044	5	S. DenseNet
1725	2.318851865824003	5	S. DenseNet
1726	0.5818148068960616	5	S. DenseNet
1727	7.42170367641228	5	S. DenseNet
1728	0.5812994760417868	5	S. DenseNet
1729	1.1778551096118266	5	S. DenseNet
1730	1.903510059955867	5	S. DenseNet
1731	0.21566794582359997	5	S. DenseNet
1732	0.7800609143280196	5	S. DenseNet
1733	4.937055495290884	5	S. DenseNet
1734	2.70353826111923	5	S. DenseNet
1735	4.095303681556342	5	S. DenseNet
1736	15.270348085823935	5	S. DenseNet
1737	0.4740201581152452	5	S. DenseNet
1738	0.5890330953393724	5	S. DenseNet
1739	3.2915880088954217	5	S. DenseNet
1740	1.1041100321462278	5	S. DenseNet
1741	0.6288352764213345	5	S. DenseNet
1742	1.620975064303662	5	S. DenseNet
1743	0.8318317744910508	5	S. DenseNet
1744	0.6259436847859652	5	S. DenseNet
1745	4.241544249783022	5	S. DenseNet
1746	4.673853400594528	5	S. DenseNet
1747	3.555668548503615	5	S. DenseNet
1748	2.685857989752319	5	S. DenseNet
1749	1.7406320353236315	5	S. DenseNet
1750	1.4306569675086116	5	S. DenseNet
1751	1.9227261155264759	5	S. DenseNet
1752	1.8508419143651966	5	S. DenseNet
1753	1.4116720012695048	5	S. DenseNet
1754	1.6123598031654096	5	S. DenseNet
1755	1.9133971370884058	5	S. DenseNet
1756	2.464864075644251	5	S. DenseNet
1757	1.1658246858357049	5	S. DenseNet
1758	2.5838957666584723	5	S. DenseNet
1759	0.9454567257962657	5	S. DenseNet
1760	0.9788650304996341	5	S. DenseNet
1761	1.4680437605823287	5	S. DenseNet
1762	2.236570425952735	5	S. DenseNet
1763	8.965197688973683	5	S. DenseNet
1764	4.790848976788335	5	S. DenseNet
1765	3.0386353676222355	5	S. DenseNet
1766	3.050827395185983	5	S. DenseNet
1767	1.943953032018556	5	S. DenseNet
1768	1.8621559662336473	5	S. DenseNet
1769	0.2714161365974028	5	S. DenseNet
1770	1.063953510777349	5	S. DenseNet
1771	0.2131733034292693	5	S. DenseNet
1772	1.411853589465108	5	S. DenseNet
1773	3.406888716793149	5	S. DenseNet
1774	1.2337376069956567	5	S. DenseNet
1775	3.0257266830936196	5	S. DenseNet
1776	1.0412327289865202	5	S. DenseNet
1777	2.0976328677115412	5	S. DenseNet
1778	1.0345958896877239	5	S. DenseNet
1779	0.42532584016319175	5	S. DenseNet
1780	0.5969684216352198	5	S. DenseNet
1781	1.6692446543391004	5	S. DenseNet
1782	65.77988093849092	5	S. DenseNet
1783	60.595989850843594	5	S. DenseNet
1784	37.28474717076387	5	S. DenseNet
1785	25.24635873534677	5	S. DenseNet
1786	25.45128404069386	5	S. DenseNet
1787	30.1506710347495	5	S. DenseNet
1788	31.734083850400413	5	S. DenseNet
1789	42.50715277069982	5	S. DenseNet
1790	50.91898657327094	5	S. DenseNet
1791	3.5177387966198572	5	S. DenseNet
1792	0.5151078415224305	5	S. DenseNet
1793	4.101626344574688	5	S. DenseNet
1794	2.0024162589638737	5	S. DenseNet
1795	2.980543732983868	5	S. DenseNet
1796	2.719188974822147	5	S. DenseNet
1797	2.197188033347953	5	S. DenseNet
1798	2.957573690958498	5	S. DenseNet
1799	3.8735316774862745	5	S. DenseNet
1800	15.103186958748758	5	S. DenseNet
1801	9.928162817340787	5	S. DenseNet
1802	1.5412459248890586	5	S. DenseNet
1803	1.1175376372437975	5	S. DenseNet
1804	0.9340776858411365	5	S. DenseNet
1805	0.45571838889859806	5	S. DenseNet
1806	1.2381084245560152	5	S. DenseNet
1807	1.9226034061105044	5	S. DenseNet
1808	9.400519801717772	5	S. DenseNet
1809	9.722985867019721	5	S. DenseNet
1810	12.837210941611191	5	S. DenseNet
1811	5.750557707426505	5	S. DenseNet
1812	2.651542384275404	5	S. DenseNet
1813	4.535604858835453	5	S. DenseNet
1814	1.3033651347673298	5	S. DenseNet
1815	1.5774413042976532	5	S. DenseNet
1816	1.8766057073654492	5	S. DenseNet
1817	62.13983909173445	5	S. DenseNet
1818	25.770593445648704	5	S. DenseNet
1819	14.804977997586034	5	S. DenseNet
1820	7.648425809828886	5	S. DenseNet
1821	6.966659060976509	5	S. DenseNet
1822	9.742137014248835	5	S. DenseNet
1823	2.458643775804841	5	S. DenseNet
1824	2.0452748672494114	5	S. DenseNet
1825	1.738274419230667	5	S. DenseNet
1826	2.6654257795618093	5	S. DenseNet
1827	0.6374815790728815	5	S. DenseNet
1828	0.5421199447115198	5	S. DenseNet
1829	9.05300764346308	5	S. DenseNet
1830	8.170328869990389	5	S. DenseNet
1831	8.515060283160357	5	S. DenseNet
1832	39.10830114847837	5	S. DenseNet
1833	38.70879361647927	5	S. DenseNet
1834	40.81812275197184	5	S. DenseNet
1835	40.03439156192334	5	S. DenseNet
1836	2.522004122584859	5	S. DenseNet
1837	2.2805165620703005	5	S. DenseNet
1838	3.955686320330687	5	S. DenseNet
1839	2.8350597244928624	5	S. DenseNet
1840	2.388707046869868	5	S. DenseNet
1841	1.8305498157528617	5	S. DenseNet
1842	2.6184930978660352	5	S. DenseNet
1843	2.9698890732681527	5	S. DenseNet
1844	3.960850694842708	5	S. DenseNet
1845	20.143167750100183	5	S. DenseNet
1846	9.921467264811955	5	S. DenseNet
1847	11.1860643481216	5	S. DenseNet
1848	9.474058704056578	5	S. DenseNet
1849	8.39864695787634	5	S. DenseNet
1850	3.877349185644388	5	S. DenseNet
1851	3.4076721847961498	5	S. DenseNet
1852	5.7971915876755755	5	S. DenseNet
1853	9.79933732147736	5	S. DenseNet
1854	2.141789854739885	5	S. DenseNet
1855	0.38736974593530754	5	S. DenseNet
1856	0.9948557335349852	5	S. DenseNet
1857	0.7172232692896083	5	S. DenseNet
1858	1.607031901691165	5	S. DenseNet
1859	0.6177266454701318	5	S. DenseNet
1860	1.4541258459368078	5	S. DenseNet
1861	0.19790281200282595	5	S. DenseNet
1862	0.7283385112226601	5	S. DenseNet
1863	0.3284212321558471	5	S. DenseNet
1864	0.7141033203706648	5	S. DenseNet
1865	4.214862197469927	5	S. DenseNet
1866	3.4896730332983465	5	S. DenseNet
1867	0.7301650470392036	5	S. DenseNet
1868	3.6161394834892344	5	S. DenseNet
1869	1.9986402149947013	5	S. DenseNet
1870	3.812421939194204	5	S. DenseNet
1871	2.555538193251684	5	S. DenseNet
1872	8.079471010162338	5	S. DenseNet
1873	4.6117971086592195	5	S. DenseNet
1874	2.8825739208788788	5	S. DenseNet
1875	3.3789686392258216	5	S. DenseNet
1876	1.7184321743826052	5	S. DenseNet
1877	5.9739898669095535	5	S. DenseNet
1878	39.895302411900346	5	S. DenseNet
1879	39.06787021364268	5	S. DenseNet
1880	28.004368140553154	5	S. DenseNet
1881	0.8235373637034998	5	S. DenseNet
1882	2.966241739166303	5	S. DenseNet
1883	2.6481833768121565	5	S. DenseNet
1884	0.5784838103018853	5	S. DenseNet
1885	1.4394094321202604	5	S. DenseNet
1886	1.1084183163638572	5	S. DenseNet
1887	0.3247280378949737	5	S. DenseNet
1888	0.4236986095996087	5	S. DenseNet
1889	0.3749632674124445	5	S. DenseNet
1890	2.692710955431105	5	S. DenseNet
1891	3.2229011382457844	5	S. DenseNet
1892	3.081696445441942	5	S. DenseNet
1893	2.513812624539821	5	S. DenseNet
1894	1.7982296647406475	5	S. DenseNet
1895	0.9780247536386597	5	S. DenseNet
1896	2.3854619471598113	5	S. DenseNet
1897	3.0983485242078266	5	S. DenseNet
1898	0.4736326257043957	5	S. DenseNet
1899	3.9750150918895493	5	S. DenseNet
1900	1.507676975800457	5	S. DenseNet
1901	4.691398048390007	5	S. DenseNet
1902	4.684909735679667	5	S. DenseNet
1903	0.3921513528486925	5	S. DenseNet
1904	1.844135668927043	5	S. DenseNet
1905	24.87769810876552	5	S. DenseNet
1906	21.774146232802117	5	S. DenseNet
1907	17.62792713858043	5	S. DenseNet
1908	0.9495316929793233	5	S. DenseNet
1909	4.55652995832828	5	S. DenseNet
1910	12.837962189171517	5	S. DenseNet
1911	6.396793148175046	5	S. DenseNet
1912	2.850473339821069	5	S. DenseNet
1913	2.287216609952767	5	S. DenseNet
1914	1.5709960632372941	5	S. DenseNet
1915	1.9197723691019308	5	S. DenseNet
1916	3.1256357742572027	5	S. DenseNet
1917	1.970451608404837	5	S. DenseNet
1918	1.394909207395828	5	S. DenseNet
1919	3.91469295927694	5	S. DenseNet
1920	1.673127147584822	5	S. DenseNet
1921	6.165375554373836	5	S. DenseNet
1922	1.0072238135198777	5	S. DenseNet
1923	0.35276473963909977	5	S. DenseNet
1924	0.7941963165686031	5	S. DenseNet
1925	3.414052884763273	5	S. DenseNet
1926	1.860314324583696	5	S. DenseNet
1927	1.0660175853734453	5	S. DenseNet
1928	1.5411059834379779	5	S. DenseNet
1929	0.6337014817177097	5	S. DenseNet
1930	1.618890893676863	5	S. DenseNet
1931	2.48114607271296	5	S. DenseNet
1932	59.28323330255168	5	S. DenseNet
1933	3.08699160485081	5	S. DenseNet
1934	92.96254504174917	5	S. DenseNet
1935	62.91553045048121	5	S. DenseNet
1936	53.26984290311941	5	S. DenseNet
1937	33.503780088227565	5	S. DenseNet
1938	28.7655009086706	5	S. DenseNet
1939	24.519210591803038	5	S. DenseNet
1940	1.0762298720769885	5	S. DenseNet
1941	1.3486813683627832	5	S. DenseNet
1942	1.897056224716856	5	S. DenseNet
1943	3.2035874364711896	5	S. DenseNet
1944	3.087129923542075	5	S. DenseNet
1945	1.4409361470600242	5	S. DenseNet
1946	9.664083063877193	5	S. DenseNet
1947	9.155826651130411	5	S. DenseNet
1948	9.634439883916073	5	S. DenseNet
1949	37.789023289528195	5	S. DenseNet
1950	28.77909991436513	5	S. DenseNet
1951	36.45189585138847	5	S. DenseNet
1952	38.409611669479006	5	S. DenseNet
1953	2.556859922372756	5	S. DenseNet
1954	5.349642220038653	5	S. DenseNet
1955	5.572345751723302	5	S. DenseNet
1956	4.659218768715828	5	S. DenseNet
1957	4.454645788763417	5	S. DenseNet
1958	1.4115729612887946	5	S. DenseNet
1959	1.1711985438572123	5	S. DenseNet
1960	1.2086993921911855	5	S. DenseNet
1961	3.101747930736451	5	S. DenseNet
1962	12.05761055052792	5	S. DenseNet
1963	8.029616794720537	5	S. DenseNet
1964	2.002652526538555	5	S. DenseNet
1965	2.657384670735304	5	S. DenseNet
1966	1.1871628617153585	5	S. DenseNet
1967	0.7664328440113313	5	S. DenseNet
1968	0.37464449916457726	5	S. DenseNet
1969	0.5605796713978071	5	S. DenseNet
1970	4.641891666169424	5	S. DenseNet
1971	4.780405550092359	5	S. DenseNet
1972	2.1690756541322926	5	S. DenseNet
1973	3.6636198688746417	5	S. DenseNet
1974	3.789468715591586	5	S. DenseNet
1975	2.014015182389829	5	S. DenseNet
1976	2.4889921050963526	5	S. DenseNet
1977	1.1935328406563948	5	S. DenseNet
1978	0.8426755856886107	5	S. DenseNet
1979	3.3549362844027018	5	S. DenseNet
1980	7.12977426763627	5	S. DenseNet
1981	3.3598883385599905	5	S. DenseNet
1982	5.944795516744488	5	S. DenseNet
1983	3.9513769950046904	5	S. DenseNet
1984	3.750693165545803	5	S. DenseNet
1985	3.436004692815382	5	S. DenseNet
1986	2.0221733642846993	5	S. DenseNet
1987	3.4456776469586807	5	S. DenseNet
1988	10.211656245283654	5	S. DenseNet
1989	86.14118909547288	5	S. DenseNet
1990	78.43558865304551	5	S. DenseNet
1991	3.4262022922333273	5	S. DenseNet
1992	1.9020519136280751	5	S. DenseNet
1993	2.9758869761351323	5	S. DenseNet
1994	2.306948839223226	5	S. DenseNet
1995	2.2649079474136595	5	S. DenseNet
1996	2.0661680106169182	5	S. DenseNet
1997	9.810953886219243	5	S. DenseNet
1998	3.779026349419584	5	S. DenseNet
[truncated: 317,501 more rows]
