# Supplementary material for: DeepPoseKit, a software toolkit for fast and robust animal pose estimation using deep learning
Source: eLife. 2019 Oct 1;8:e47994. doi: 10.7554/eLife.47994 (PMC6897514; doi:10.7554/eLife.47994)
Supplement: Appendix 8—figure 1—source data 2. — See 'Materials and methods’ for details. [file elife-47994-app8-fig1-data2.csv]

	errors
0	2.3532981837151428
1	1.0346795168243292
2	0.8854090178801641
3	0.884865172258832
4	1.8763057210448069
5	0.1615602032121707
6	2.7008140165841503
7	1.0859249833299294
8	0.8291716906102675
9	1.360967104321023
10	0.4143826357661539
11	1.0300471139122787
12	1.0825955167224164
13	1.5518179077034917
14	0.5860081867170893
15	0.45732975872280524
16	0.5264283217290686
17	1.8676071423308336
18	2.339988015185204
19	0.9535665240817268
20	1.1657694633683533
21	0.2574037719896595
22	0.820254729811922
23	0.5792402072050418
24	2.1779126423293307
25	1.6623369324098254
26	0.8188740352280608
27	1.291372305674337
28	0.08046203369035705
29	0.5559139060074088
30	0.4919194529795736
31	1.646242832312979
32	0.9029432564564588
33	0.28692442619310105
34	0.39987411190207706
35	1.0531778292940595
36	1.691396779682526
37	1.2318067547927234
38	1.958367072708012
39	1.2318206791849085
40	0.8650681773208757
41	0.7001907372128069
42	0.6016870817510073
43	0.44644304313532235
44	2.0172409707181664
45	2.0892303514617376
46	1.71110167350156
47	1.7131568055397055
48	1.0009502745430057
49	1.6692057048422198
50	1.7294522638487806
51	0.06778185443785066
52	1.3366039860209882
53	2.62904622640544
54	0.47909943987559034
55	1.0019842830380046
56	1.3998490163983972
57	0.6713393946852174
58	0.7820130961794866
59	0.919641548545484
60	1.2003811597667273
61	1.3977866224438866
62	0.8237630863072177
63	1.2086486431623502
64	0.9985373449881644
65	2.1440355351565046
66	0.5103200350839917
67	0.7505161944744503
68	1.7897977167988803
69	0.9162887534915463
70	1.9036962626607818
71	1.6043069522336753
72	0.7406380072303641
73	1.6751004834792085
74	1.9332929246452282
75	0.8670942503784709
76	0.7067366213897693
77	0.2842910786537425
78	2.3775957571656483
79	0.47226522260662507
80	0.8554377513249418
81	0.9903888323819738
82	0.3641280112299595
83	1.6655696055725941
84	1.6626070828930641
85	0.8464236132702632
86	3.0656964060681298
87	1.349132177006263
88	0.6000823174418959
89	1.122595166483296
90	1.346246681953121
91	0.826026850930464
92	1.1668601992377836
93	1.2086586881236134
94	0.7764223166603744
95	0.841753366890434
96	0.7860414530135449
97	0.748073258390747
98	1.3640701292557598
99	0.542855370407387
100	0.24969543408868067
101	1.5669096423151676
102	1.5840114937474286
103	0.5121960608385651
104	1.9325346623365725
105	0.5751505496863654
106	1.1356055625504633
107	0.1827922334645395
108	2.029175782439936
109	1.579302480009579
110	0.5271831283303418
111	0.7955633759914276
112	3.001638212790949
113	0.4690899768690763
114	3.790849092349975
115	0.9401240826483083
116	0.09588089256195795
117	1.3945626913542124
118	0.963006065265171
119	0.920359681516322
120	0.2591943366687749
121	1.348255454836481
122	1.0932592677407684
123	0.5192220215386812
124	0.839742959115279
125	0.8862240087862759
126	0.18923348999181486
127	0.6267640608634968
128	0.1489545690714327
129	1.1219278209341579
130	0.4582311465919036
131	0.7951763986336233
132	0.7036732328024048
133	0.3470291008524192
134	0.8153017547546311
135	0.485032112524414
136	1.2149393770798227
137	0.9842175879429873
138	1.0282769793721076
139	0.589966426502022
140	3.6319757629520253
141	1.0698231623879535
142	0.5332127976615331
143	1.1212492566871526
144	0.4085296857952097
145	1.0094085304064926
146	3.7111946983288866
147	1.6166255279947706
148	1.6525512511860805
149	0.2862226013947668
150	2.430868511521285
151	0.9784076664376402
152	0.9640078053913024
153	1.0568645348061378
154	1.9708979016121178
155	1.6169780699441285
156	2.9676213353324394
157	0.5759887879276304
158	1.0930391259499619
159	1.1969733398101992
160	0.6067381291591702
161	1.4982691147557927
162	3.343247959926878
163	0.06184054484467287
164	1.1432162101456136
165	0.7140401289267495
166	1.580963046016836
167	0.5903987737652057
168	1.0832987142288628
169	1.733117130694306
170	0.286941069992723
171	0.44844160662656973
172	0.49965185639842646
173	0.48511798249137006
174	0.9119898015229236
175	1.3334930478077431
176	1.4866533296649993
177	1.1643235187135348
178	1.8999021571061259
179	1.5650104539638652
180	1.1428535385832457
181	1.269078223663471
182	1.9731062306281728
183	0.3885909492542935
184	1.9678160507983236
185	0.9758824833030937
186	1.6699219301460262
187	1.021061721481335
188	0.5371090147864809
189	1.728740774202128
190	0.8289417340659372
191	1.3562869898984697
192	0.7581263487592841
193	2.5246357570237286
194	0.9123389801176099
195	0.12762892545049992
196	1.4634497192715992
197	0.6052731555098689
198	1.0499537118411986
199	0.7109977713698422
200	1.0816420625670435
201	2.16354738963937
202	0.5444740313462203
203	0.2891633466253872
204	0.09879061205325211
205	1.4343680900682871
206	0.7158160660492717
207	0.6860049529769299
208	1.5683633116391704
209	0.474289506164689
210	1.108870433833298
211	0.964156250638069
212	1.419141514726737
213	1.3268298836678483
214	1.242378221621971
215	0.8540752777815368
216	1.674152833373347
217	0.49205135597442684
218	1.4480087367999819
219	0.9114477210824717
220	1.0448056019815075
221	0.7090990195730877
222	1.270294732661281
223	0.31333059545983705
224	1.7442589074031618
225	1.3560525430812087
226	1.6599529703830576
227	0.21540443886849558
228	0.743067549639988
229	0.9257949690996523
230	0.994119623724029
231	1.3349829073657593
232	0.43640361579131576
233	0.5870732104794854
234	1.1376489994417427
235	0.6519135932439603
236	0.9711804917160903
237	1.7899952102566432
238	1.0840058607183303
239	0.8612649343425063
240	0.3526444012976925
241	0.666323158726072
242	0.9412363226033998
243	0.9364460585405862
244	0.369739871159758
245	1.5122533796747188
246	0.5243874958342116
247	0.9196402956876107
248	0.6271843399821654
249	1.413099520248593
250	1.174345282672781
251	0.8071225012781985
252	2.237559730771935
253	1.2209148411506006
254	1.5975412239382871
255	0.6501955716776234
256	0.6352269542078006
257	1.0317224060093828
258	0.260307012538873
259	0.5466856279446389
260	1.0292170509485645
261	1.7729641933931213
262	0.6276651739459064
263	1.5964307830709856
264	2.330033901801209
265	1.4856590688706468
266	1.0062022936460233
267	1.0238754299490698
268	1.3235715585180565
269	0.5440745755709171
270	3.0080702304562585
271	1.7105969881071066
272	1.2903757681013652
273	0.36557592820140616
274	0.8247449311828263
275	1.2480145611401574
276	0.5247809185769353
277	1.681927055808329
278	2.6780466977722672
279	0.6629115452934149
280	1.0398559172408006
281	1.0830519659443532
282	0.5215115893736259
283	0.9210015001043058
284	0.24621760793904499
285	1.9184665235766458
286	1.4009703814820142
287	1.0178491862339827
288	0.30143174277457646
289	0.42308545340459897
290	0.5515509843034306
291	1.1435173383894204
292	0.6568061784316179
293	0.9104594701529218
294	1.0417861974040366
295	0.5718497064215345
296	0.635784651783725
297	1.337882661117991
298	1.4327262893437718
299	0.6427723819272135
300	0.4978724634479332
301	0.3324384479182299
302	0.34406349440149425
303	0.8180058904567629
304	0.8889877409807354
305	0.5697460869327933
306	0.8168618010246363
307	1.2931048090856427
308	0.9570723956413942
309	0.9474835458892186
310	1.5072241721982884
311	0.5475346270391902
312	1.1628223343963964
313	0.8586115862376065
314	0.41170346727248064
315	0.18458089886703788
316	1.2697291196780336
317	1.008579035433334
318	0.6841827897946541
319	0.6042682078379442
320	0.7258833383513954
321	1.5805952936938652
322	0.6284921047124825
323	0.8937935181174923
324	1.2271603560456066
325	1.219745112431611
326	1.0939291406087444
327	0.6433083113892134
328	1.3340397221495661
329	2.799019107849218
330	1.4644629563437854
331	0.9977351338611182
332	1.1469819551730391
333	0.5452124169835623
334	0.765472543823037
335	0.3836439284811534
336	1.9294936604351451
337	0.8761666568067574
338	1.9187619765000627
339	0.9282460583747911
340	0.7523484711038171
341	1.0380126193172845
342	0.8142941564541957
343	0.18725718067359107
344	0.9990242706811784
345	1.220045919629954
346	1.0306226121996374
347	1.0839968791364707
348	0.7403745399248612
349	0.38101122535112886
350	0.5782857004353698
351	0.17901182940639437
352	0.6915271998772189
353	1.8723021946344642
354	1.4318389690684825
355	0.5270452074219253
356	2.797969195522093
357	1.494344099148467
358	2.058994928725671
359	0.24206354389869308
360	1.7800608902286865
361	1.7286582337780165
362	1.5507860241376867
363	0.8537779255839507
364	0.474028205361621
365	2.4147901302938126
366	0.434890621123849
367	0.37546625659612326
368	1.2215612130841544
369	0.3825819905876229
370	0.36063688441193603
371	1.4625019072284366
372	1.4852003890721073
373	1.0901191866606992
374	0.21437660040037299
375	1.041841891905071
376	1.2174213657483142
377	1.0456098882707228
378	1.3041125510996616
379	0.8491650106165342
380	1.5256072819192585
381	1.1179625622754916
382	2.3320295881484965
383	2.9182670051885737
384	0.3585036413389115
385	1.479837584886181
386	0.16861768165413127
387	0.6509691515878246
388	1.7851757119962333
389	3.3601661241376695
390	2.1118613238612096
391	0.7096203935370445
392	2.3984679304425716
393	1.6029953956197287
394	0.9601310718814224
395	3.4533107121475393
396	0.582316354312918
397	0.6608448453789876
398	2.087877020376472
399	1.231324813366542
400	1.2246342383019242
401	1.9548441544081907
402	1.8773095305614795
403	0.6146434520265441
404	0.5825301012492701
405	1.5630193889569568
406	1.8564375389376429
407	0.8713581353266343
408	0.787772804456212
409	1.8698678202668098
410	2.0193184856712247
411	0.7131538924727676
412	1.1653169834371
413	0.5869612400612157
414	1.9582975699178284
415	1.0256928074459482
416	1.3216264762533556
417	1.495652807127539
418	1.03393569107582
419	2.1745287821537347
420	0.8883736622271796
421	0.6411759402215262
422	2.142550707085067
423	0.6776693689402777
424	1.0047190498712277
425	0.6806277395829674
426	0.6252796230105631
427	1.0122868016880804
428	2.118099358063694
429	0.6516736837837722
430	2.2765669955521886
431	1.2099340878524012
432	1.6843513863933812
433	1.1163947991038767
434	0.5883111920342302
435	1.050455025271159
436	0.5955394388943859
437	0.6207959534055897
438	1.0741542648904776
439	0.6614158780345196
440	1.4120751072532793
441	0.9790323137350839
442	0.17148555725075937
443	1.5886876716601668
444	0.9717343806073734
445	0.5997585476139637
446	0.47216161117740973
447	1.0508515716921683
448	2.197741886374371
449	0.5451697714876999
450	0.4785998000648618
451	1.6397083060377267
452	0.8263591134606941
453	3.7014862995746065
454	0.6629432731364354
455	0.7980884379790286
456	2.252766478857328
457	1.2293594844034965
458	0.9657829300655487
459	1.1041598057485116
460	0.5066615394364379
461	2.072252021673427
462	0.414401671489481
463	0.5925506435372873
